1  
2  
3  
4  
5  
6  
7  
8  
9  
10  
11  
12  
13  
14  
15  
16  
17  
18  
19  
20  
21  
22  
23  
24

# Impact of Sample Type and DNA Isolation Procedure on Genomic Inference of Microbiome Composition

Berith E. Knudsen<sup>a</sup>, Lasse Bergmark<sup>a\*</sup>, Patrick Munk<sup>a</sup>, Oksana Lukjancenko<sup>a</sup>, Anders Priemé<sup>2</sup>, Frank M. Aarestrup<sup>a</sup>, Sünje J. Pamp<sup>a#</sup>

<sup>a</sup>National Food Institute, Technical University of Denmark, Kgs. Lyngby, Denmark

<sup>b</sup>Department of Biology, University of Copenhagen, Copenhagen, Denmark

B.E.K and L.B. contributed equally to this work.

\* Present address: Novo Nordisk, Bagsværdvej, 2880 Bagsværd, Denmark

# Address correspondence to: Sünje J. Pamp, [sjpa@food.dtu.dk](mailto:sjpa@food.dtu.dk)

Running title: DNA Isolation Methodology for Microbiome Genomics

Keywords: microbial ecology, microbiome, DNA isolation, 16S rDNA gene sequencing, metagenomics

25 **ABSTRACT**

26

27 Explorations of complex microbiomes using genomics greatly enhance our  
28 understanding about their diversity, biogeography, and function. The isolation of DNA  
29 from microbiome specimens is a key prerequisite for such examinations, but challenges  
30 remain in obtaining sufficient DNA quantities required for certain sequencing  
31 approaches, achieving accurate genomic inference of microbiome composition, and  
32 facilitating comparability of findings across specimen types and sequencing projects.  
33 These aspects are particularly relevant for the genomics-based global surveillance of  
34 infectious agents and antimicrobial resistance from different reservoirs. Here, we  
35 compare a total of eight DNA extraction procedures for three specimen types (human  
36 feces, pig feces, hospital sewage), assess DNA extraction using spike-in controls and  
37 different types of beads for bead-beating facilitating cell lysis. We evaluate DNA  
38 concentration, purity, and stability, and microbial community composition using 16S  
39 rRNA gene sequencing and for selected samples using shotgun metagenomic  
40 sequencing. Our results suggest that inferred community composition was dependent on  
41 inherent specimen properties as well as DNA extraction method. We further show that  
42 bead-beating or enzymatic treatment can increase the extraction of DNA from Gram-  
43 positive bacteria. Final DNA quantities could be increased by isolating DNA from a  
44 larger volume of cell lysate compared to standard protocols. Based on this insight, we  
45 have designed an improved DNA isolation procedure optimized for microbiome  
46 genomics that can be used for the three examined specimen types and potentially also  
47 for other biological specimens.

48 **IMPORTANCE**

49

50 Sequencing-based analyses of microbiomes may lead to a breakthrough in our  
51 understanding of the microbial world associate with humans, animals, and the  
52 environment. Such insight could further the development of innovative ecosystem  
53 management approaches for the protection of our natural resources, and the design of  
54 more effective and sustainable solutions to prevent and control infectious diseases.  
55 Genome sequence information is an organism- (pathogen-) independent language that  
56 can be used across sectors, space, and time. Harmonized standards, protocols, and  
57 workflows for sample processing and analysis can facilitate the generation of such  
58 actionable information. In this study, we assessed several procedures for the isolation of  
59 DNA for next-generation sequencing. Our study highlights several important aspects to  
60 consider in the design and conduction of sequence-based analysis of microbiomes. We  
61 provide a standard operating procedure for the isolation of DNA from a range of  
62 biological specimens particularly relevant in clinical diagnostics and epidemiology.

## 63 INTRODUCTION

64

65 Microbial communities fulfill central roles in biological systems, such as in human,  
66 animal, and environmental ecosystems. Genomics-based interrogations of these  
67 communities can provide unprecedented insight into their composition and function, and  
68 reveal general principles and rules about their ecology and evolution (1-4).

69 Genomics-based microbiome analyses can also have important practical implications,  
70 such as for the diagnosis and management of infectious diseases. Together with  
71 relevant metadata and appropriate bioinformatics and statistical approaches, genomic  
72 sequencing data could enable the global surveillance of emerging and re-emerging  
73 infectious diseases, and teach us about the reservoirs and transmission pathways of  
74 pathogens (5-7). Ultimately, genomics-based information about infectious disease  
75 epidemiology may help us to predict, prevent, and control infectious diseases faster,  
76 more precisely, and more sustainably.

77 In order to facilitate large-scale microbiome analyses, harmonized standards for sample  
78 handling and data analysis need to be ensured. To be able to establish pathogen  
79 reservoirs and transmission pathways, specimens from different sources, such as from  
80 humans, animals, and the environment, will need to be examined. For genomics  
81 analysis, the DNA needs to be isolated from the specimens for DNA sequencing.  
82 However, DNA isolation methods are often only evaluated and established in the context  
83 of specimens from an individual source (e.g. human fecal specimens), and seldom  
84 across a variety of specimen types (8-12), which is addressed in the present study.  
85 Current sequencing technologies, such as Illumina MiSeq and HiSeq, PacBio,  
86 IonTorrent, and Nanopore systems, still require large initial DNA template quantities,

87 particularly from the perspective of PCR-free metagenomics-based analysis. In contrast,  
88 16S rRNA gene profiling can reveal a bacterial and archaeal composition for samples  
89 with low initial DNA template quantities. In metagenomics, low quantities of input DNA  
90 can result in low sequencing data output, and impact the inferred microbial community  
91 composition (13). Hence, modified DNA isolation protocols for increasing DNA quantities  
92 obtained from different types of specimens are desirable.

93 Here, we examine three specimen types (human feces, animal feces, and sewage), a  
94 total of eight commercially available DNA isolation kits, and a number of protocol  
95 modifications in regard to output DNA (quantity, purity, stability) and microbiome  
96 composition (16S rRNA gene profiling, metagenomics). Our results suggest that both,  
97 the specimen itself as well as the DNA isolation procedure, can affect DNA quantity and  
98 quality, and inferred microbiome composition. Based on the insight gained, we  
99 developed an improved laboratory protocol that can be used for DNA isolations from a  
100 variety of biological specimens.

101 **RESULTS**

102

103 **DNA concentration, purity, and stability depend on the type of specimen and DNA**

104 **isolation method.** We extracted DNA from human feces, pig feces, and hospital

105 sewage, using seven commonly used DNA isolation kits and determined DNA

106 concentration, purity, and stability of the isolated DNA (Fig. 1A and Table 1). The DNA

107 concentrations varied greatly (Fig. 1B; see also Table S1A in the supplemental

108 material). For human feces, the highest DNA concentrations were obtained using the

109 EasyDNA, MagNAPure, and QIAStool procedure, for pig feces using the EasyDNA,

110 QIAStool, and QIAStool+BB procedures, and for sewage using the MagNAPure and

111 EasyDNA procedure, while for three methods the DNA concentration from sewage was

112 below the detection limit. On average across the three types of specimen, the highest

113 DNA concentrations were obtained using EasyDNA (44.96 ng/μl +/- 20.99 SEM) and

114 QIAStool (27.88 ng/μl +/- 2.55 SEM), and the lowest using the PowerSoil.HMP (1.55

115 ng/μl +/- 0.31 SEM) and InnuPREP (7.77 ng/μl +/- 5.54 SEM) methods.

116 With regard to DNA purity, the best results for human and pig feces were obtained using

117 the EasyDNA, QIAStool, and QIAStool+BB procedure (see Table S1A in the

118 supplemental material). The DNA was generally stable for at least 7 days when stored at

119 room temperature (22°C) with some exceptions (see Table S1A in the supplemental

120 material). A decrease in DNA concentration over time was observed for example for the

121 human feces when extracted with EasyDNA (57% decrease in DNA concentration) or

122 MagNAPure (21% decrease in DNA concentration), suggesting the presence of DNases

123 in these extracts. In some cases, an increase in DNA concentration over time was

124 observed, such as for the pig feces when extracted with EasyDNA (32% increase in

125 DNA concentration). An increase in DNA concentration over time at room temperature  
126 was previously shown to be related to the hyperchromicity of DNA, and dependent on  
127 the DNA concentration and ionic strength of the solution (14).

128  
129 **Microbial richness and diversity are influenced by DNA isolation procedure.** For  
130 the human fecal specimen, the highest bacterial Operational Taxonomic Unit (OTU)  
131 richness and diversity were detected using the QIAStool+BB and FastDNA methods,  
132 followed by InnuPURE and PowerSoil as assessed by 16S rRNA gene profiling (Fig. 1C;  
133 see also Table S1B in the supplemental material). In comparison, the determined  
134 richness and diversity for the EasyDNA method was low, and the relative abundance of  
135 Ruminococcaceae and Bifidobacteriaceae dominated the composition compared to the  
136 extracts from the other methods (Fig. 1C; see also Fig. S1A in the supplemental  
137 material). Thirty-nine samples (human feces, pig feces, and sewage) with high DNA  
138 concentration were selected and examined using metagenomic sequencing. In this  
139 assessment, the species richness and diversity for human feces was highest for the  
140 EasyDNA procedure, and a high relative abundance of Ruminococcaceae and  
141 Bifidobacteriaceae was apparent in this analysis as well (see Fig. S1A in the  
142 supplemental material).

143 For the pig fecal specimen, the highest bacterial richness and diversity were detected  
144 using the PowerSoil.HMP and MagNAPure methods, followed by QIAStool+BB (Fig. 1C;  
145 see also Table S1B in the supplemental material). Similarly, richness and diversity were  
146 highest using the MagNAPure and EasyDNA methods when assessed using  
147 metagenomics. Based on 16S rRNA gene profiling, the richness and diversity for the  
148 FastDNA method were lower compared to all other methods, and the relative

149 abundance of Clostridiaceae and Turicibacteraceae was higher and the abundance of  
150 Prevotellaceae and Ruminococcaceae lower using this method, compared to the other  
151 methods (Fig. 1C; see also Fig. S1A in the supplemental material).  
152 For the sewage specimen, the highest bacterial richness and diversity was detected  
153 using the InnuPURE method, followed by PowerSoil.HMP and QIAStool+BB, and similar  
154 levels were achieved using the other methods (Fig. 1C; see also Table S1B in the  
155 supplemental material). The relative abundance of Clostridiaceae was highest in the  
156 samples extracted using EasyDNA, and the abundance of Enterobacteriales highest in  
157 the samples extracted using PowerSoil.HMP.  
158 Overall, the relative abundance of predicted Gram-positive bacteria was highest in the  
159 human and sewage specimens when extracted with the EasyDNA method, and highest  
160 in the pig specimen when extracted using the FastDNA method (see Fig. S2 in the  
161 supplemental material). The abundance of predicted Gram-positive bacteria was lowest  
162 using MagNAPure and QIAStool, the two methods that did neither include a bead-  
163 beating step nor specific enzymatic cell-wall digestion.

164  
165 **Microbial community composition depends on the choice of DNA isolation**  
166 **procedure.** The microbial communities from the three types of specimen clustered  
167 separately according to specimen type when examined in PCoA Bray-Curtis ordination,  
168 and not according to DNA isolation procedure (see Fig. S3 in the supplemental  
169 material), indicating that the largest differences between these samples are driven by  
170 the inherent microbiota composition. Bray-Curtis dissimilarity distance analysis carried  
171 out separately for each of the three specimens revealed that the samples largely  
172 clustered according to DNA isolation procedure (Fig. 2A-C). For the human fecal



173 specimen, the bacterial community composition derived from the EasyDNA isolation  
174 differed from the communities obtained using all other methods (Fig. 2A), which is in  
175 agreement with the observations on microbial richness (above). The Bray-Curtis  
176 distances between the samples from InnuPURE, MagNAPure, FastDNA,  
177 PowerSoil.HMP, QIAStool, and QIAStool+BB DNA isolations were on average 0.337 +/-  
178 0.012 SEM, whereas the distances between these and the ones derived from the  
179 EasyDNA procedure were on average 0.825 +/- 0.014 SEM.  
180 For the pig fecal specimen, the bacterial communities derived from the FastDNA  
181 isolation differed from all other communities (Fig. 2B). The average Bray-Curtis distance  
182 between the samples originating from all but the FastDNA procedure was on average  
183 0.473 +/- 0.008 SEM, whereas the distance between these and the ones derived from  
184 the FastDNA procedure was on average 0.877 +/- 0.007 SEM.  
185 For the hospital sewage specimen, the bacterial communities originating from the  
186 EasyDNA method differed from all others (average Bray-Curtis distance 0.600 +/- 0.006  
187 SEM) (Fig. 2C), similar to the human fecal matrix (Fig. 2A). In addition, the communities  
188 originating from the QIAStool DNA isolation differed from all others (average Bray-Curtis  
189 distance 0.514 +/- 0.009 SEM), whereas the average Bray-Curtis distance between all  
190 but the QIAStool and EasyDNA samples was 0.460 +/- 0.11 SEM on average.

191  
192 **Distinct taxa account for the differences observed between DNA isolation**  
193 **methods.** To quantify the effect of DNA isolation method on microbial community  
194 composition we tested for differential abundance of taxa between the communities  
195 derived from the different DNA isolation methods using DESeq2 analyses. In pairwise

196 comparisons, significant differences between the DNA isolation methods were observed  
197 (Fig. 2D-F; see also Table S2 in the supplemental material).

198 The most abundant family on average in the human fecal specimen was Prevotellaceae  
199 (Bacteroidetes), and its abundance was significantly lower in the samples extracted with  
200 EasyDNA as compared to all other methods (e.g. 18.3-fold lower in EasyDNA vs.  
201 QIAStool, adjusted p-value  $1.91^{-6}$ ) (Fig. 2D; see also Table S2 in the supplemental  
202 material). Similarly, the abundance of Bacteroidaceae (Bacteroidetes),  
203 Porphyromonadaceae (Bacteroidetes), Alcaligenaceae ( $\beta$ -Proteobacteria), and  
204 Pasteurellaceae ( $\gamma$ -Proteobacteria) was lower in the samples from the EasyDNA  
205 isolation compared to the other methods. In contrast, the abundance of  
206 Bifidobacteriaceae (Actinobacteria) was higher in the samples originating from the  
207 EasyDNA procedure compared to all other methods (e.g. 770-fold higher in EasyDNA  
208 vs. QIAStool, adjusted p-value  $7.49^{-57}$ ). The abundance of Verrucomicrobiaceae  
209 (Verrucomicrobia) was significantly lower in the samples from the QIAStool+BB and  
210 PowerSoil.HMP DNA isolations (e.g. 4.15-fold lower in QIAStool+BB vs. QIAStool,  
211 adjusted p-value 0.001).

212 The most abundant family on average in the pig fecal specimen was Prevotellaceae  
213 (Bacteroidetes), and its abundance differed significantly between the DNA isolation  
214 procedures (e.g. 2.3-fold lower in EasyDNA vs. PowerSoil.HMP, adjusted p-value  $1.28^{-5}$ )  
215 (Fig. 2E; see also Table S2 in the supplemental material). The abundance of  
216 Clostridiaceae (Clostridia), the on average fourth most abundant family in the pig feces,  
217 was significantly higher in the samples extracted by the FastDNA method (e.g. 166-fold  
218 higher in FastDNA vs. EasyDNA, adjusted p-value  $7.35^{-110}$ ).

219 Moraxellaceae ( $\gamma$ -Proteobacteria) was the most abundant family on average in the  
220 hospital sewage, and its abundance was significantly higher in the samples from the  
221 EasyDNA isolation compared to other DNA isolation methods (e.g. 2.6-fold higher in  
222 EasyDNA vs. PowerSoil.HMP, adjusted p-value  $3.82^{-5}$ ) (Fig. 2F; see also Table S2 in  
223 the supplemental material). Ruminococcaceae (Clostridia), the on average third most  
224 abundant family in sewage, were also significantly more abundant in the samples from  
225 the EasyDNA isolation compared to other DNA isolation procedures (e.g. 7.3-fold higher  
226 in EasyDNA vs. FastDNA, adjusted p-value  $4.28^{-17}$ ).

227  
228 **DNA isolation procedure affects the abundance of taxa differently across**  
229 **specimens.** Given that differential taxa abundances were observed for the different  
230 DNA isolation procedures for the three specimen types, we investigated whether the  
231 abundance differed in the same way between DNA isolation procedures across  
232 specimens. For example, we were asking: If taxon A is observed at a higher abundance  
233 upon DNA isolation with method X compared to method Y in specimen type 1, is this  
234 taxon also observed at a higher abundance upon DNA isolation with method X  
235 compared to method Y in specimen type 2? We examined taxa that were detected in all  
236 three specimen types, and selected representative families from different phyla (Fig. 3).  
237 Similar patterns of differential abundance were observed for certain taxa across  
238 specimen types, with exceptions, including two families from the Bacteroidetes phylum.  
239 The abundance of Prevotellaceae and Bacteroidaceae was significantly lower when  
240 human fecal specimen were extracted with EasyDNA compared to other methods. In  
241 contrast, these two families were observed at a significantly higher abundance when  
242 sewage was extracted with EasyDNA compared to other methods (Fig. 3).

243 Likewise, Ruminococcaceae of the phylum Clostridia were observed at a significantly  
244 higher abundance in human fecal and hospital sewage samples but not in pig fecal  
245 samples when extracted with the EasyDNA method compared to other methods. The  
246 same pattern was however not observed for all families of the phylum Clostridia.  
247 Clostridiaceae abundance appeared higher in human and pig feces when extracted with  
248 FastDNA compared to other methods, and Clostridiaceae abundance appeared higher  
249 in sewage when extracted using the EasyDNA method compared to other methods (Fig.  
250 3).

251 Thus, we found significant differences in the abundance of certain families according to  
252 specimen type, which sometimes depend on the DNA isolation procedure. Some of the  
253 differential abundance patterns were similar across the three types of specimens, while  
254 others differed.

255  
256 **Detection of spiked bacteria is dependent on DNA isolation procedure and**  
257 **specimen type.** In order to quantify DNA isolation efficiency, we spiked the three  
258 specimen with known numbers of two bacterial representatives, namely *Salmonella*  
259 *enterica* serotype Typhimurium DT104 (Gram-negative) and *Staphylococcus aureus*  
260 ST398 (Gram-positive) in a CFU ratio of 1.02. Both, *S. enterica* and *S. aureus* were  
261 present in negligible numbers in the three specimens before spiking. DNA was isolated  
262 from these samples using the seven different DNA isolation methods, and the  
263 abundance of the two strains determined using 16S rRNA gene profiling, and for some  
264 samples also using metagenomics. Based on 16S rRNA gene profiling, the spiked  
265 organisms accounted for an average abundance of 1.0% (+/-0.29 SEM)

266 Enterobacteriaceae, and 0.29% (+/-0.11 SEM) Staphylococcaceae across the three  
267 types of specimen.

268 Using QIAStool, a DNA isolation method that does not involve a bead-beating step, the  
269 abundance of Enterobacteriaceae was higher in the spiked human fecal specimen than  
270 expected, with an Enterobacteriaceae/Staphylococcaceae (E/S) ratio of 13.9 (Fig. 4A).  
271 This ratio was lower in the spiked human fecal specimen using InnuPURE, FastDNA,  
272 PowerSoil.HMP, and QIAStool+BB, which are all methods that involve a bead-beating  
273 step (E/S ratio range 0.3-2.3). The EasyDNA method involves an additional enzymatic  
274 lysis step, and using this method the determined E/S ratio was 3.7. Using the  
275 MagNAPure method no or lower read numbers assigned to Staphylococcaceae were  
276 detected in the spiked samples compared to not spiked samples in the human fecal  
277 specimen, and hence the ratio resulted in negative values (Fig. 4A). A similar result was  
278 obtained when the samples were examined using metagenomics (see Fig. S4 in the  
279 supplemental material).

280 Overall, most DNA isolation methods exhibited a similar tendency across the three types  
281 of specimen. For example, for all three specimen types, the E/S ratio was higher using  
282 the QIAStool method, compared to the other methods (except MagNAPure for sewage).  
283 However, when the strain mix, composed of *S. enterica* and *S. aureus* only, was  
284 extracted using the seven DNA isolation procedures, their determined E/S ratio was in  
285 almost all cases similar to the expected ratio of 1.02, including the QIAStool method.  
286 This suggests that quantification of distinct organisms from complex specimens is more  
287 challenging when the organisms are present at lower abundance levels. Inherent  
288 specimen properties may influence the DNA isolation efficiency leading to a biased  
289 pattern of microbial community composition.

290

291 **Protocol modifications for increasing DNA concentration.** One goal in genomics is

292 to obtain a predicted pattern of microbial community composition that closely resembles

293 the actual composition of microorganisms in a particular environment. Another challenge

294 is to obtain sufficient DNA for metagenome sequencing. To address this aspect, we

295 examined the effect of modifications to standard protocols on output DNA concentration

296 (modifications are described in detail in the Supplemental Materials & Methods section).

297 We chose the QIAStool method as a starting point, as we obtained DNA extracts using

298 this method that were of high purity and stability (see Table S1A in the supplemental

299 material). Another concern is processing time and costs for DNA isolation procedures,

300 particularly for large-scale microbiome projects. The protocol of the QIAamp Fast DNA

301 Stool Mini kit (QIAFast), a kit that became available at the time the present study was

302 carried out, suggested reduced processing time compared to the QIAStool method.

303 When we compared the QIAStool and QIAFast methods using metagenomic

304 sequencing, we obtained a similar richness, diversity, and microbial community

305 composition with these two methods (see Fig. S5 in the supplemental material).

306 Furthermore, given that our previous results suggested that including a bead-beating

307 step might result in a predicted community composition that was more similar to the

308 community of known composition than without this step (Fig. 4), we included a bead-

309 beating step and examined the effect of beads of differing types and cost (Table 1). We

310 obtained a higher DNA concentration using pig feces and the QIAStool kit, when bead

311 beating was applied and the double amount of volume after cell lysis was transferred

312 (Fig. 5A). Similarly, for the QIAFast method, we obtained an on average 2.6-fold higher

313 DNA concentration by including a bead beating step and transferring the double amount

314 of volume after cell lysis, compared to DNA isolations without these modifications (Fig.  
315 5A). Both, DNA purity and stability were in the expected range (see Table S3 in the  
316 supplemental material). Even though the DNA concentration was higher with these  
317 protocol modifications, the richness, diversity and community composition did not  
318 significantly differ when assessed by 16S rRNA gene profiling (Fig. 5A).  
319 A particular DNA isolation method did not however lead to the highest DNA  
320 concentrations for each of the three types of specimen. Whereas the highest DNA  
321 concentration for sewage was achieved using the QIAFast+BB.GBT+2Trans method  
322 (27.30 ng/ul +/- 4.5 SEM), the highest DNA concentration for human feces was obtained  
323 using the QIAStool+BB.LMA method (22.50 ng/ul +/- 4.77 SEM) (Fig. 5B). For pig feces,  
324 the highest DNA concentrations were obtained using the QIAStool+BB.LMA (15.43 ng/ul  
325 +/-3.48 SEM) and QIAStool (14.57 ng/ul +/-3.62 SEM) methods. On average across the  
326 three types of specimen, the highest DNA concentrations were obtained using the  
327 QIAFast+BB.GBT+2Trans (17.66 ng/ul +/- 4.82 SEM) and QIAStool+BB.LMA (17.46  
328 ng/ul +/- 2.54 SEM) methods.

329

## 330 **DISCUSSION**

331

332 Genomics-based investigations of complex microbiomes greatly enhance our  
333 understanding about microbial community composition and function relevant to human,  
334 animal, and plant health, infectious diseases, environmental pollution, agriculture, and  
335 food safety. One current ambitious goal is to establish a global surveillance system for  
336 infectious agents and antimicrobial resistance based on next-generation DNA  
337 sequencing approaches (15). Given that infectious agents occupy various ecological

338 habitats, DNA needs to be extracted from various types of specimen using standardized  
339 approaches in a time- and cost-efficient manner. It is advantageous, if a range of  
340 different specimens can be processed using the same standard operating procedure. In  
341 light of these considerations, we compared a total of eight DNA isolation procedures,  
342 and based on the findings developed an improved protocol using the QIAamp<sup>®</sup> Fast  
343 DNA Stool Mini kit.

344 Overall, the amounts of DNA obtained from each DNA isolation method differed greatly,  
345 and there was no significant correlation between increasing DNA amount and increase  
346 in community diversity or richness. The taxonomic microbiome composition appeared to  
347 be dependent on both, the specimen and DNA isolation method. For example, the  
348 EasyDNA procedure preferentially extracted DNA from Gram-positive bacteria from the  
349 human feces and hospital sewage, while the FastDNA procedure preferentially extracted  
350 DNA from Gram-positive bacteria from pig feces. Methods that did not include a bead-  
351 beating or enzymatic treatment step generally extracted less DNA from Gram-positive  
352 bacteria.

353 When using a particular procedure we found some similar abundance patterns of  
354 specific bacterial families between the three specimen types. However, we also  
355 observed several differences. Hence, one cannot conclude that the DNA from a  
356 particular bacterial family will be extracted preferentially using one specific DNA isolation  
357 method across different types of specimens. This could be due to different inherent  
358 cellular properties of the taxa belonging to a specific family, affecting mechanical and  
359 enzymatic cell lysis. Moreover, the chemical and physical composition of the specimen  
360 could influence DNA isolation and downstream procedures. For example, it is well  
361 known that certain compounds, such as humic acid, polysaccharides, and bilirubin can



362 affect PCR (16). Furthermore, fecal sample consistency, reflecting differences in water  
363 content and activity, can impact on microbial community composition (17).

364 Our observations from 16S rRNA gene profiling and metagenomics generally agreed,  
365 but the taxonomic patterns also exhibited some differences. One reason could be the  
366 known primer biases towards certain taxa in 16S rRNA gene based analysis (18). An  
367 additional reason could be differences in the composition of the reference databases  
368 used for the two sequence-based strategies. While 16S rRNA gene databases are  
369 composed of 16S rRNA gene sequences from a large diversity of taxa, the  
370 metagenomic sequence databases are based on whole and draft genome sequences  
371 from fewer and less diverse taxa. Both strategies complement each other, and efforts  
372 are ongoing in developing harmonized analytical workflows for sequence-based  
373 microbial community analysis.

374 Based on the insight gained in this study, we have developed an improved DNA  
375 isolation method based on the QIAamp<sup>®</sup> Fast DNA Stool Mini kit. This procedure  
376 includes a bead beading step to obtain DNA from both, Gram-positive and Gram-  
377 negative taxa, and a step in which the double amount of cell lysate is transferred to the  
378 column to increase the DNA quantity. A standard operating procedure for this DNA  
379 isolation method is available from <https://dx.doi.org/10.6084/m9.figshare.3475406.v1>,  
380 and which can be used for different specimen types relevant to projects like EFFORT-  
381 against-AMR, COMPARE-Europe, the International Microbiome Initiative, and  
382 International Human Microbiome Standards.

383 In summary, our findings provide new insight into the effect of different specimen types  
384 and DNA isolation methods on DNA quantities and genomic-based inference of  
385 microbiome composition. We offer an optimized strategy for the DNA isolation for

386 different sample types providing a representative insight into community composition,  
387 and which can be conducted in a time- and cost-efficient manner.

## 388 MATERIAL AND METHODS

389

### 390 Specimen Collection and Handling

391 Human fecal specimens were collected from a healthy individual. Pig fecal specimens

392 were collected from animals at a conventional pig production farm in Denmark.

393 Untreated sewage was collected from the sewage inlet of the Herlev hospital waste

394 water treatment plant, Denmark. For details regarding sample handling and processing,

395 see Supplemental Materials and Methods.

396

### 397 Spiking with strain mix

398 Subsequent to specimen collection, about half of the aliquots from the human, pig, and

399 sewage were spiked with a representative of Gram-positive and Gram-negative bacteria,

400 namely *Staphylococcus aureus* ST398 (strain S0385) and *Salmonella enterica* serotype

401 Typhimurium DT104. For details regarding the preparation of the strain mix, see

402 Supplemental Materials and Methods.

403

### 404 DNA isolation

405 In a first step, seven DNA isolation procedures were examined, namely: InnuPure® C16,

406 Analytic Jena AG (InnuPURE); MagNA Pure LC DNA isolation Kit III, Roche

407 (MagNAPure); Easy-DNA™ gDNA Purification Kit, Invitrogen (EasyDNA); MP

408 FastDNA™ Spin Kit, MP Biomedicals (FastDNA); PowerSoil® DNA Isolation kit, MoBio

409 (PowerSoil.HMP); QIAamp® DNA Stool Mini Kit, Qiagen (QIAstool); QIAamp® DNA

410 Stool Mini Kit +Bead Beating, Qiagen (QIAstool+BB) (see Table 1, and details below).

411 In a second step, a variety of modifications to two Qiagen kits were examined, namely

412 the QIAamp<sup>®</sup> DNA Stool Mini Kit (QIAStool), and QIAamp<sup>®</sup> Fast DNA Stool Mini Kit  
413 (QIAFast). The standard operating procedure for an improved DNA isolation method (i.e.  
414 QIAamp Fast DNA Stool Modified, corresponding to QIAFast+BB.GBT+2Trans  
415 described here) can be found at <https://dx.doi.org/10.6084/m9.figshare.3475406.v1>. For  
416 details regarding the individual DNA isolation procedures, see Supplemental Materials  
417 and Methods.

418

#### 419 **DNA quantitation and quality assessment**

420 Subsequent to DNA isolation, the DNA was portioned into 10- $\mu$ l aliquots to prevent  
421 repeated freeze-thawing cycles, and stored at -20°C. DNA concentrations were  
422 measured using Qubit<sup>®</sup> dsDNA BR Assay Kit on a Qubit<sup>®</sup> 2.0 Fluorometer (Invitrogen,  
423 Carlsbad, CA). As DNA extracts can contain contaminants, such as proteins and other  
424 organic molecules that can affect downstream procedures such as DNA amplifications in  
425 PCR, we determined the DNA purity by measuring the ratios of absorbance at 260/280  
426 and 260/230, respectively, using a NanoDrop 1000 Spectrophotometer (Thermo  
427 Scientific, Pittsburgh, USA). DNA extracts with a 260/280 ratio between ~1.7 to ~ 2.0,  
428 and 260/230 ration between ~2.0 to ~2.2 are regarded as “pure”. The stability of the  
429 DNA in the extracts was determined by measuring the DNA concentration after 2 and 7  
430 days incubation at 22°C. A decrease in DNA concentration over time can indicate the  
431 presence of DNases in the extract.

432

#### 433 **16S rRNA gene profiling**

434 16S rRNA gene amplicon libraries were generated using a two-step protocol similar as  
435 described in Part # 15044223 Rev. B by Illumina. In a first PCR, the V4 region of the  
436 16S rRNA genes were amplified using the universal primers (515f 5'-

437 TGCCAGCAGCCGCGGTAATAC (19) and 806r 5'-GGACTACNNGGGTATCTAAT (20).  
438 The samples were pooled in equal concentrations, and concentrated using 'DNA clean  
439 and concentrator-5 kit' (Zymo Research, Orange, CA). Paired-end 2 × 250 bp  
440 sequencing of barcoded amplicons was performed on a MiSeq machine running v2  
441 chemistry (Illumina Inc., San Diego, CA, USA). The sequences were processed using  
442 the UPARSE pipeline (21) and a OTU x sample contingency table was created. Using  
443 QIIME1.8.0 (22), taxonomy was assigned with uclust using assign\_taxonomy.py based  
444 on the Greengenes 13.8 reference database. Ecological diversity estimates and  
445 microbial community comparisons were performed using the relevant scripts provided by  
446 QIIME, phyloseq, and R (22-24). For details regarding the 16S rRNA gene-based  
447 microbial community analysis, see Supplemental Materials and Methods.

448

#### 449 **Metagenomics**

450 A subset of the DNA extracts was subjected to metagenomic sequencing. The samples  
451 were prepared and sequenced following the Nextera XT DNA Library Preparation Guide  
452 for the MiSeq system Part # 15031942 Rev. D, using paired-end v2 2×250bp  
453 sequencing. The taxonomic microbiome compositions were determined through the use  
454 of the MGmapper pipeline (25). The MGmapper package is available for download at  
455 [www.cbs.dtu.dk/public/MGmapper/](http://www.cbs.dtu.dk/public/MGmapper/). For details regarding the metagenomics-based  
456 microbial community analysis, see Supplemental Materials and Methods.

457

#### 458 **Differential abundance analysis**

459 In order to test for the differential abundance of taxa that may drive the differences  
460 observed between the communities derived from the different DNA isolation procedures,  
461 we performed DESeq2 analyses. The read count tables from the 16S rRNA gene

462 profiling and metagenomics sequence analysis, respectively, were aggregated to the  
463 family level in R (v. 3.2.3, 64bit) (24) We performed an analysis that allows for varied  
464 sequencing depth, similar as suggested previously (26), and carried out two-sided Wald  
465 tests as implemented in the DESeq2 (v. 1.10.1) package (27). The size factors were  
466 determined by DESeq2 from the read count tables. For details regarding the differential  
467 abundance analysis, see Supplemental Materials and Methods.

468

### 469 **Quantification of strain mix**

470 The samples that were spiked with the strain mix composed of *S. enterica* Typhimurium  
471 DT104 and *S. aureus* ST398 were extracted, sequenced, and analyzed together with  
472 the non-spiked samples. For each type of specimen and isolation method, the  
473 abundance of Enterobacteriaceae and Staphylococcaceae for 16S rRNA gene profiling  
474 and metagenomics, respectively, were determined. The ratios between  
475 Enterobacteriaceae and Staphylococcaceae was determined for each sample matrix  
476 and isolation method, and compared to the *S. enterica* Typhimurium DT104 / *S. aureus*  
477 ST398 ratio of CFU that were added to the original samples. For details regarding the  
478 quantification of the strain mix, see Supplemental Materials and Methods.

479

### 480 **Ethics**

481 The collection of human and pig fecal specimens as well as sewage was non-invasive,  
482 and were performed in accordance with the Declaration of Helsinki, and complied with  
483 Danish and European directives (86/609/EEC). The collection of specimens was  
484 conducted in accordance with the act on research ethics of health research projects as  
485 administrated and confirmed by the National Committee on Health Research Ethics of  
486 Denmark (Region Hovedstaden), Journal nr. H-14013582.

487

## 488 **Nucleotide sequences**

489 The 16S rRNA gene sequences are available from the European Nucleotide Archive  
490 (ENA) at the European Bioinformatics Institute (EBI) under accession number  
491 PRJEB12431, and the metagenomic sequences from ENA at EBI under accession  
492 number PRJEB14814.

493

## 494 **ACKNOWLEDGEMENTS**

495 We thank Karin Vestberg (University of Copenhagen), Christina A. Svendsen (Technical  
496 University of Denmark) and Jacob D. Jensen (Technical University of Denmark) for  
497 technical assistance related to DNA sequencing. Marie S. Jensen (Technical University  
498 of Denmark) is acknowledged for the collection of pig fecal samples.

499

## 500 **FUNDING INFORMATION**

501 This work was supported by the European Unions's Seventh Framework Programme,  
502 FP7 (613754), the Framework Programme for Research and Innovation, Horizon2020  
503 (643476), and The Villum Foundation (VWR023052). Sünje J. Pamp was supported by a  
504 grant from Carlsbergfondet (2013\_01\_0377). The funders had no role in study design,  
505 data collection and interpretation, or the decision to submit the work for publication.

506

## 507 **AUTHOR CONTRIBUTIONS**

508 B.E.K., L.B., F.M.A., and S.J.P. designed the research; B.E.K., L.B., O.L., and P.M.  
509 performed the research; B.E.K., L.B., O.L., P.M., A.P., F.M.A., and S.J.P. contributed

510 analytic tools; B.E.K., L.B., O.L., P.M., and S.J.P. analyzed the data; B.E.K., L.B., and  
511 S.J.P. wrote the manuscript; and O.L., P.M., and A.P. edited the manuscript.



512 **REFERENCES**

- 513 1. **Ding T, Schloss PD.** 2015. Dynamics and associations of microbial community types  
514 across the human body. *Nature* **509**:357–360.
- 515 2. **Schloissnig S, Arumugam M, Sunagawa S, Mitreva M, Tap J, Zhu A, Waller A,**  
516 **Mende DR, Kultima JR, Martin J, Kota K, Sunyaev SR, Weinstock GM, Bork P.** 2013.  
517 Genomic variation landscape of the human gut microbiome. *Nature* **493**:45–50.
- 518 3. **Guidi L, Chaffron S, Bittner L, Eveillard D, Larhlimi A, Roux S, Darzi Y, Audic S,**  
519 **Berline L, Brum JR, Coelho LP, Espinoza JCI, Malviya S, Sunagawa S, Dimier C,**  
520 **Kandels-Lewis S, Picheral M, Poulain J, Searson S, Stemmann L, Not F, Hingamp P,**  
521 **Speich S, Follows M, Karp-Boss L, Boss E, Ogata H, Pesant S, Weissenbach J,**  
522 **Wincker P, Acinas SG, Bork P, de Vargas C, Iudicone D, Sullivan MB, Raes J,**  
523 **Karsenti E, Bowler C, Gorsky G.** 2016. Plankton networks driving carbon export in the  
524 oligotrophic ocean. *Nature* **532**:465–470.
- 525 4. **Costello EK, Stagaman K, Dethlefsen L, Bohannan BJM, Relman DA.** 2012. The  
526 application of ecological theory toward an understanding of the human microbiome.  
527 *Science* **336**:1255–1262.
- 528 5. **Relman DA.** 2014. Actionable Sequence Data on Infectious Diseases in the Clinical  
529 Workplace. *Clinical Chemistry* **61**:38–40.
- 530 6. **Petersen TN, Rasmussen S, Hasman H, Carøe C, Bælum J, Schultz AC, Bergmark L,**  
531 **Svendsen CA, Lund O, Sicheritz-Ponten T, Aarestrup FM.** 2015. Meta-genomic  
532 analysis of toilet waste from long distance flights; a step towards global surveillance of  
533 infectious diseases and antimicrobial resistance. *Sci Rep* 1–9.
- 534 7. **Lipkin WI.** 2013. The changing face of pathogen discovery and surveillance. *Nature*  
535 *Reviews Microbiology* **11**:133–141.

- 536 8. **Wesolowska-Andersen A, Bahl MI, Carvalho V, Kristiansen K, n TS-P, Gupta R,**  
537 **Licht TR.** 2014. Choice of bacterial DNA extraction method from fecal material influences  
538 community structure as evaluated by metagenomic analysis. *Microbiome* **2**:1–11.
- 539 9. **Mackenzie BW, Taylor MW, Waite DW.** 2015. Evaluating variation in human gut  
540 microbiota profiles due to DNA extraction method and inter-subject differences 1–11.
- 541 10. **Henderson G, Cox F, Kittelmann S, Miri VH, Zethof M, Noel SJ, Waghorn GC,**  
542 **Janssen PH.** 2013. Effect of DNA Extraction Methods and Sampling Techniques on the  
543 Apparent Structure of Cow and Sheep Rumen Microbial Communities. *PLoS ONE*  
544 **8**:e74787.
- 545 11. **Yuan S, Cohen DB, Ravel J, Abdo Z, Forney LJ.** 2012. Evaluation of Methods for the  
546 Extraction and Purification of DNA from the Human Microbiome. *PLoS ONE* **7**:e33865.
- 547 12. **Albertsen M, Karst SM, Ziegler AS, Kirkegaard RH, Nielsen PH.** 2015. Back to Basics  
548 – The Influence of DNA Extraction and Primer Choice on Phylogenetic Analysis of  
549 Activated Sludge Communities. *PLoS ONE* **10**:e0132783.
- 550 13. **Bowers RM, Clum A, Tice H, Lim J, Singh K, Ciobanu D, Ngan CY, Cheng J-F,**  
551 **Tringe SG, Woyke T.** 2015. Impact of library preparation protocols and template quantity  
552 on the metagenomic reconstruction of a mock microbial community. *BMC Genomics*  
553 **16**:1–12.
- 554 14. **Gupta Das NN, Basu S, Bagchi B.** 1967. Conformational Changes in Denaturated DNA,  
555 pp. 663–688. *In* Ramachandran, GN (ed.), *Conformation of Biopolymers*. Academic  
556 Press, London and New York.
- 557 15. **Aarestrup FM, Koopmans MG.** 2016. Sharing Data for Global Infectious Disease  
558 Surveillance and Outbreak Detection. *Trends in Microbiology* **24**:241–245.

- 559 16. **Radstrom P, Knutsson R, Wolffs P, Lovenklev M, Lofstrom C.** 2004. Pre-PCR  
560 processing: strategies to generate PCR-compatible samples. *Mol Biotechnol* **26**:133–146.
- 561 17. **Vandeputte D, Falony G, Vieira-Silva S, Tito RY, Joossens M, Raes J.** 2016. Stool  
562 consistency is strongly associated with gut microbiota richness and composition,  
563 enterotypes and bacterial growth rates. *Gut* **65**:57–62.
- 564 18. **Klindworth A, Pruesse E, Schweer T, Peplies J, Quast C, Horn M, Glockner FO.**  
565 2012. Evaluation of general 16S ribosomal RNA gene PCR primers for classical and next-  
566 generation sequencing-based diversity studies. *Nucleic Acids Research* **41**:e1–e1.
- 567 19. **Yu Y, Lee C, Kim J, Hwang S.** 2005. Group-specific primer and probe sets to detect  
568 methanogenic communities using quantitative real-time polymerase chain reaction.  
569 *Biotechnol Bioeng* **89**:670–679.
- 570 20. **Sundberg C, Al-Soud WA, Larsson M, Alm E, Yekta SS, Svensson BH, Sørensen SJ,**  
571 **Karlsson A.** 2013. 454 pyrosequencing analyses of bacterial and archaeal richness in 21  
572 full-scale biogas digesters. *FEMS Microbiology Ecology* **85**:612–626.
- 573 21. **Edgar RC.** 2013. UPARSE: highly accurate OTU sequences from microbial amplicon  
574 reads. *Nature Methods* **10**:996–998.
- 575 22. **Caporaso JG, Kuczynski J, Stombaugh J, Bittinger K, Bushman FD, Costello EK,**  
576 **Fierer N, Peña AG, Goodrich JK, Gordon JI, Huttley GA, Kelley ST, Knights D,**  
577 **Koenig JE, Ley RE, Lozupone CA, McDonald D, Muegge BD, Pirrung M, Reeder J,**  
578 **Sevinsky JR, Turnbaugh PJ, Walters WA, Widmann J, Yatsunenko T, Zaneveld J,**  
579 **Knight R.** 2010. QIIME allows analysis of high-throughput community sequencing data.  
580 *Nature Methods* **7**:335–336.
- 581 23. **McMurdie PJ, Holmes S.** 2013. phyloseq: An R Package for Reproducible Interactive

- 582            Analysis and Graphics of Microbiome Census Data. PLoS ONE **8**:e61217.
- 583    24.    **R Development Core Team**. 2014. R: A Language and Environment for Statistical  
584            Computing. R Foundation for Statistical Computing, Vienna, Austria.
- 585    25.    **Petersen TN, Bælum J, Lukjancenko O, Geertz-Hansen HM, Thomsen MCF,**  
586            **Sperotto MM, Lund O, Aarestrup FM, Sicheritz-Ponten T**. 2015. MGmapper: an  
587            automated pipeline for mapping and stratification of metagenomics sequence data.  
588            Submitted.
- 589    26.    **McMurdie PJ, Holmes S**. 2014. Waste Not, Want Not: Why Rarefying Microbiome Data  
590            Is Inadmissible. PLOS Computational Biology **10**:e1003531.
- 591    27.    **Love MI, Huber W, Anders S**. 2014. Moderated estimation of fold change and dispersion  
592            for RNA-seq data with DESeq2. Genome Biology **15**:31.

## FIGURES

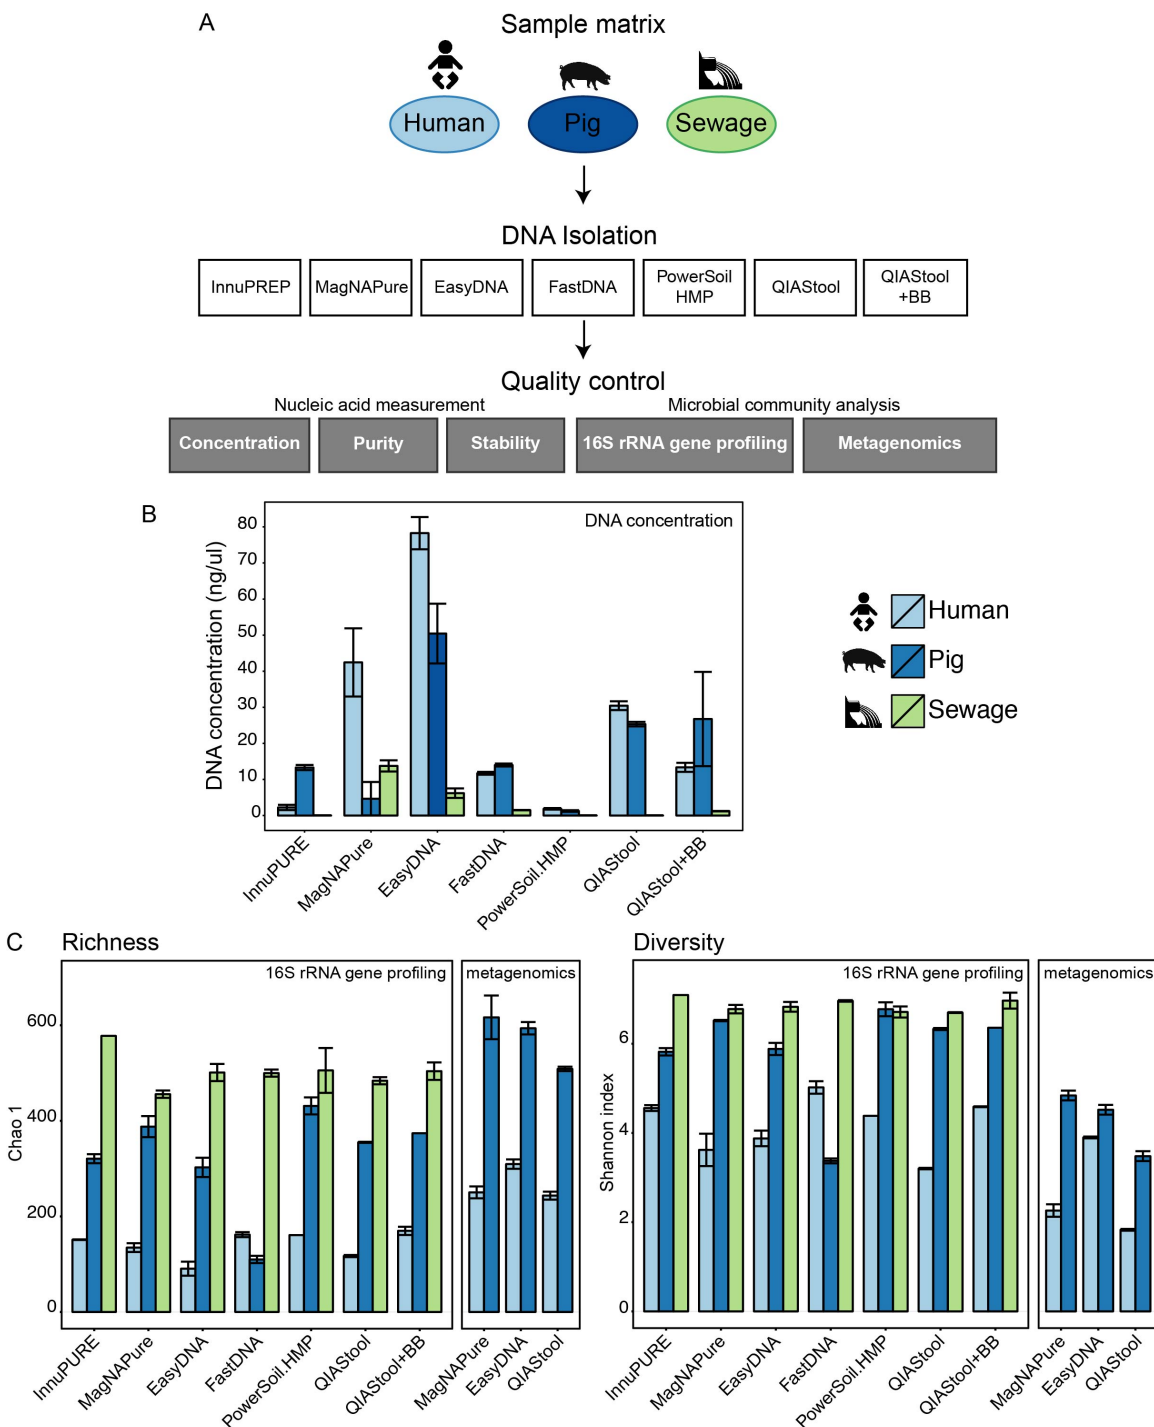

**FIG 1. Comparison of DNA extraction methods.** (A) Experimental design. Human feces, pig feces, and hospital sewage were extracted using seven different DNA extraction methods (see also Table 1): InnuPure® C16, MagNA Pure LC DNA isolation Kit III, Easy-DNA™ gDNA Purification Kit, MP FastDNA™ Spin Kit, PowerSoil® DNA

*Impact of Sample Type and DNA Isolation Procedure on Genomic Inference of Microbiome Composition*

Knudsen *et al.*

Isolation kit, QIAamp® DNA Stool Mini Kit, QIAamp® DNA Stool Mini Kit + Bead Beating (For details see Materials and Methods). DNA concentration, purity, and stability were examined, and microbial community composition determined using 16S rRNA gene profiling and metagenomics (selected samples). (B) DNA from each method was dissolved in 100 ul solution and DNA concentrations were determined using Qubit® dsDNA BR Assay Kit measurements. Values represent averages from duplicate or triplicate DNA extractions (See also Supplemental Table S1A). (C) Ecological richness (Chao 1) and diversity (Shannon index) were determined based on contingency tables from 16S rRNA gene profiling and metagenomic sequencing data at OTU and species levels, respectively (See also Supplemental Table S1B).

*Impact of Sample Type and DNA Isolation Procedure on Genomic Inference of Microbiome Composition*

Knudsen *et al.*

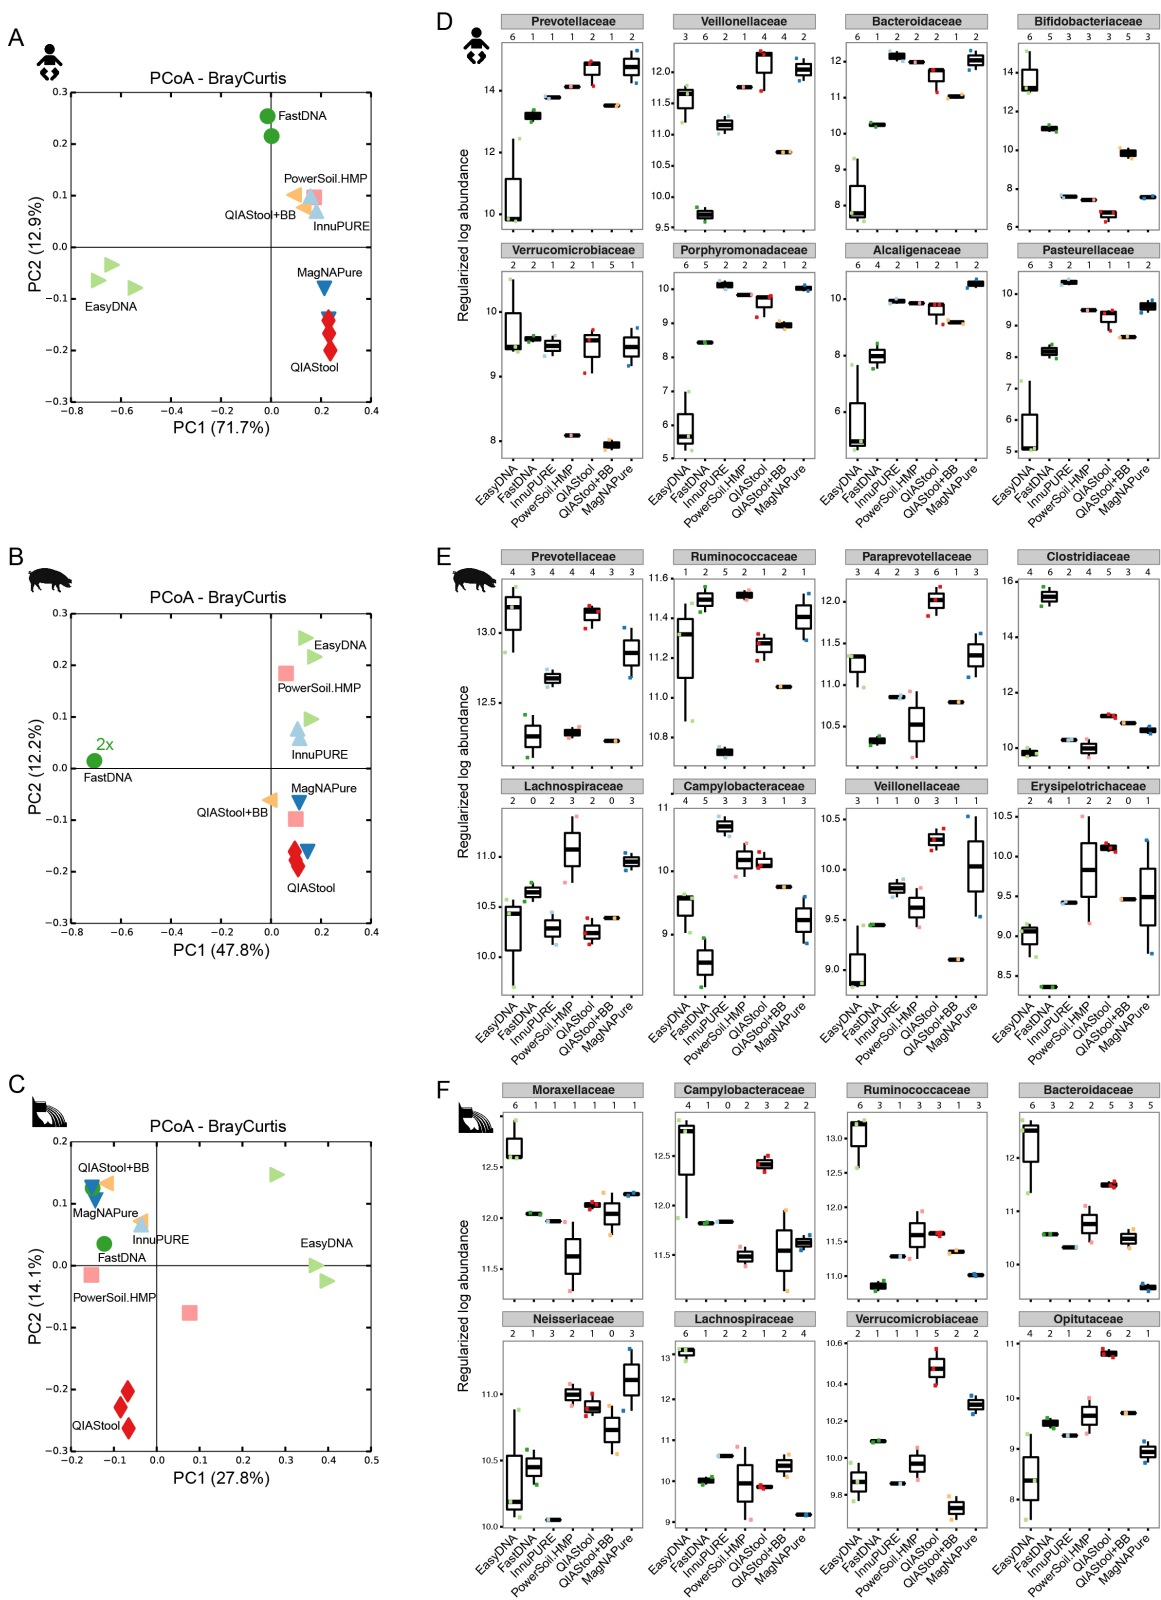

**FIG 2. Microbial community dissimilarity.** The dissimilarity between the microbiotas from the human, pig, and sewage samples based on DNA extraction methods was

*Impact of Sample Type and DNA Isolation Procedure on Genomic Inference of Microbiome Composition*

Knudsen *et al.*

examined using Principal Coordinates Analysis of Bray-Curtis distances (A-C) and differential abundance analysis using DESeq2 (D-F) from 16S rRNA amplicon data. (A-F) For the PCoA Bray-Curtis ordination analysis only samples with 800 or more reads were included. (D-F) For the differential abundance analysis pairwise testing by DNA extraction method was performed, and bacterial families were considered significantly differentially abundant if their adjusted P-value was <0.1 (see also Table S2 in the supplemental material). Examples for differentially abundant families are shown that are among the top10 most abundant taxa found in the sample, respectively. For each family, the total number of DNA isolation procedures, that exhibit significantly different abundance values compared to a particular DNA isolation procedure, are indicated above the plot, respectively.

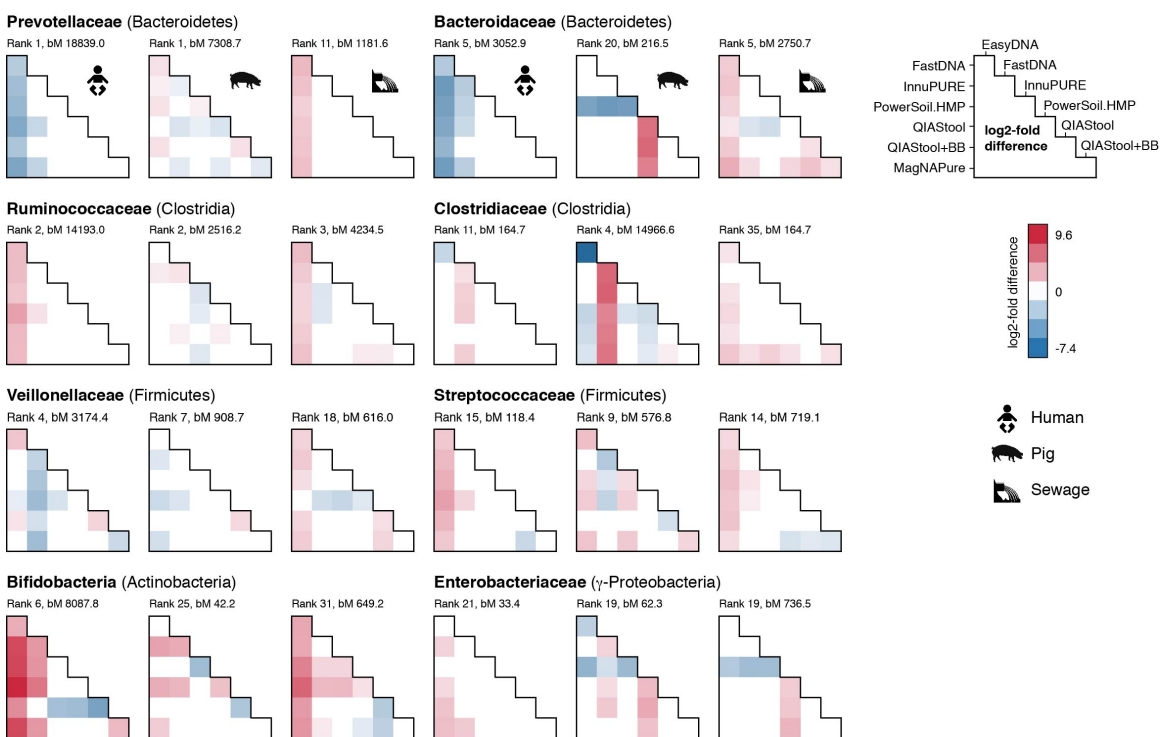

**FIG 3. Differential abundance of bacterial families.** Pairwise testing by DNA extraction method was performed using DESeq2, and the log<sub>2</sub>-fold difference displayed (column vs. rows) for selected families present in all sample matrices if their adjusted P-value was <0.1 (see also Table S2 in the supplemental material). The rank abundance position for each family per sample matrix type is noted according to their regularized log abundance. The baseMean (bM) indicates the mean of negative-binomial-based normalized read counts.



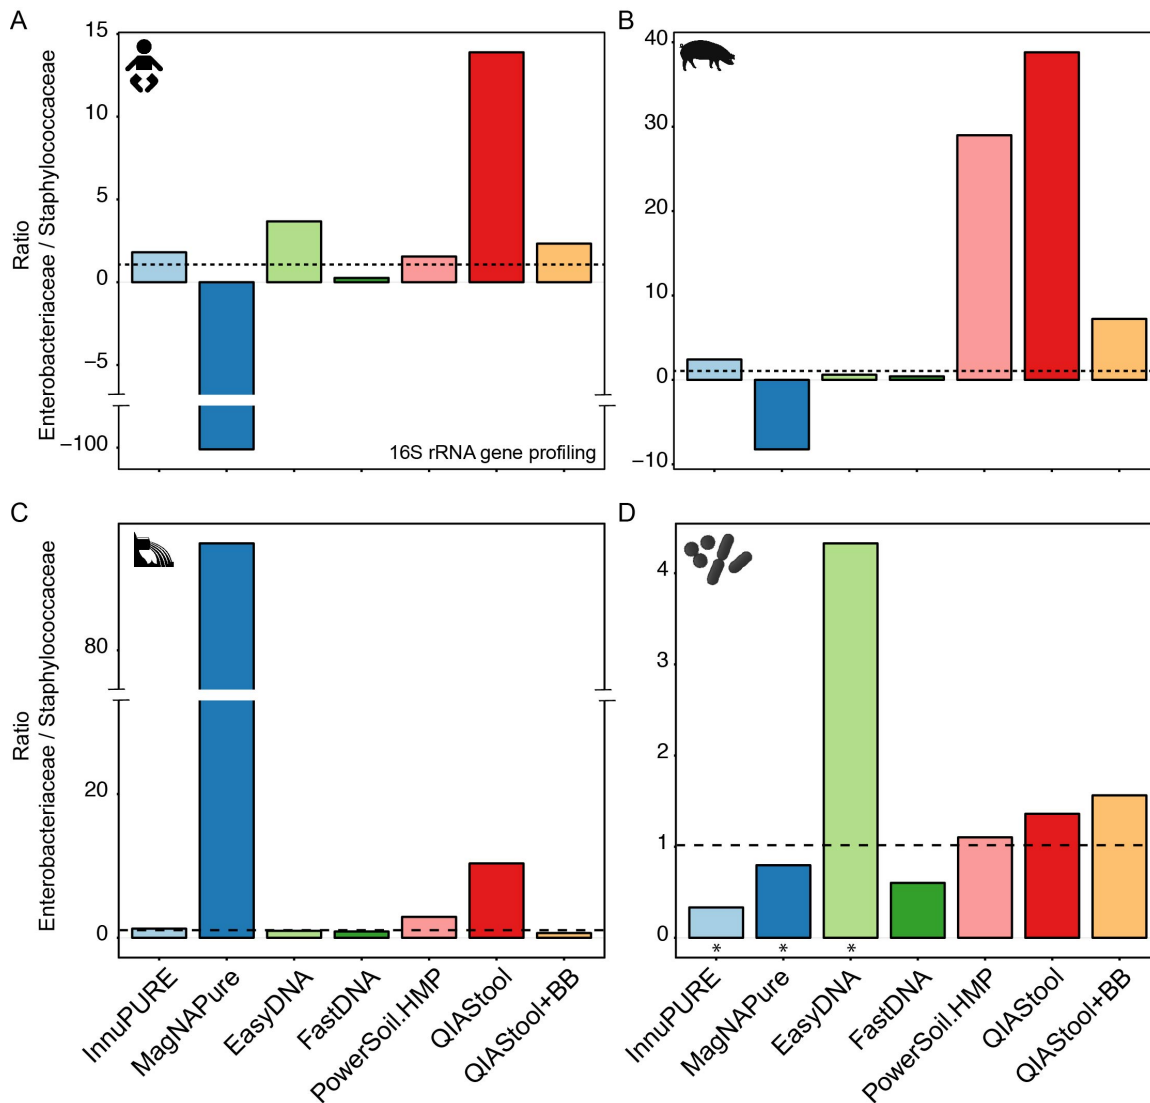

**FIG 4. Detection of spiked bacteria.** The human fecal (A), pig fecal (B), and hospital sewage (C) samples were spiked with a strain mix composed of *Salmonella enterica* serotype Typhimurium DT104 and *Staphylococcus aureus* ST398 in a CFU ratio of 1.02. The three sample matrices, as well as aliquots of the strain mix (D) were extracted using seven different DNA extraction methods. The two strains were detected by 16S rRNA gene profiling, and their ratios determined. For details, see Materials and Methods. An asterisk in (D) indicates that the values for the particular DNA extraction of the strain mix are based on single measurements. All other values are based on averages from duplicate or triplicate DNA extractions. The dashed line indicates the ratio of the strain mix based on CFU determinations.

*Impact of Sample Type and DNA Isolation Procedure on Genomic Inference of Microbiome Composition*

Knudsen *et al.*

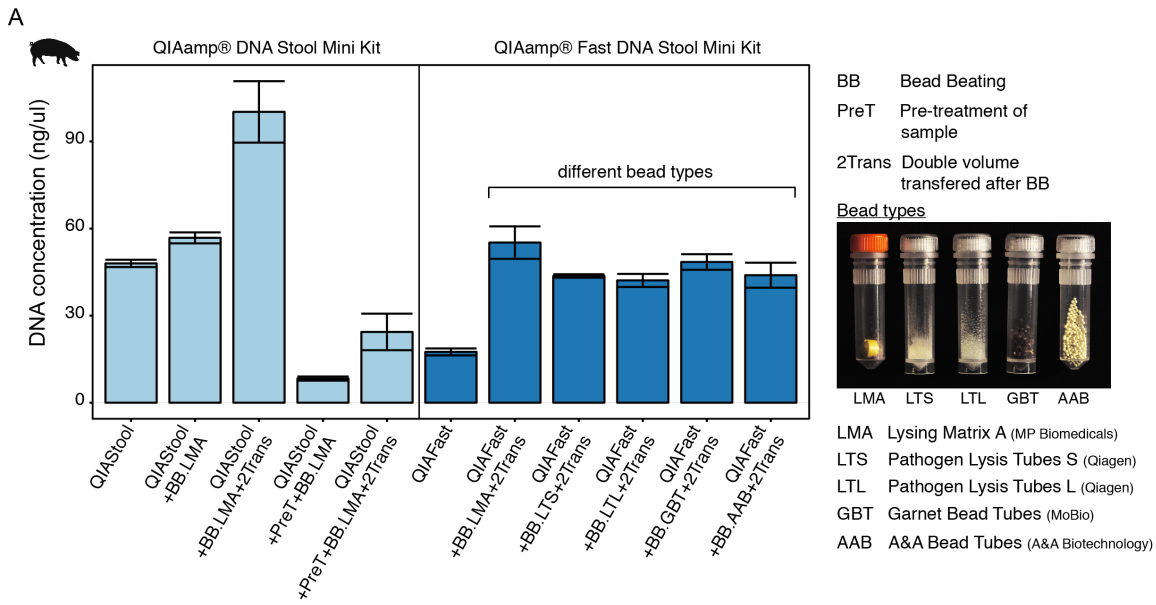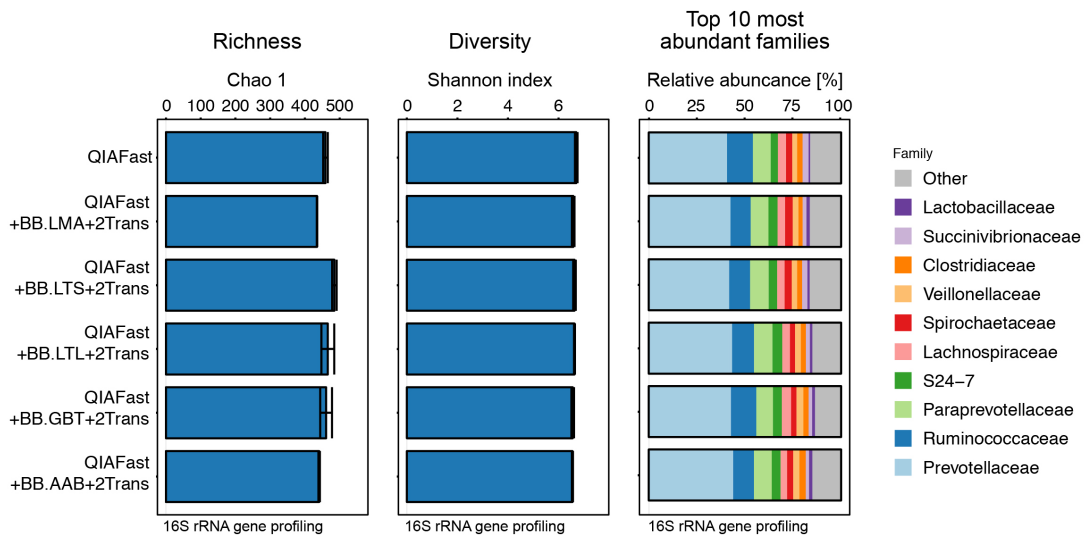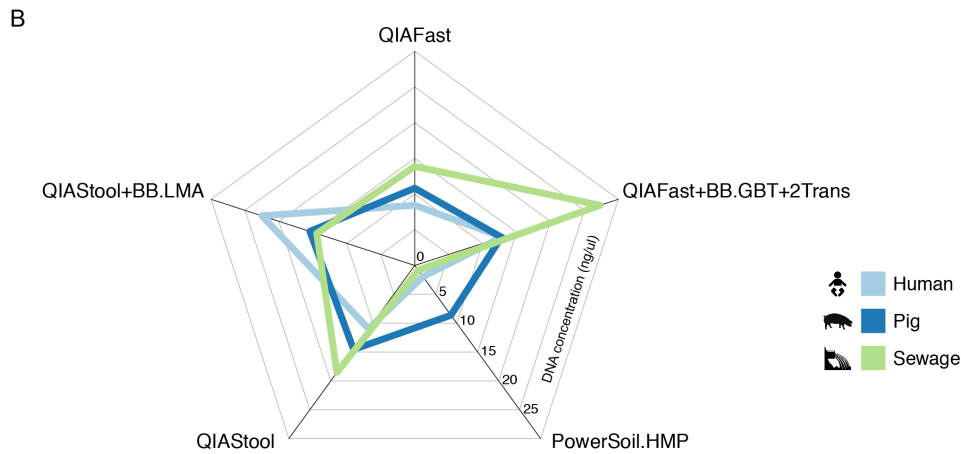

**FIG 5. Effect of protocol modifications.** A) Pig feces was extracted using standard as well as modified protocols based on the QIAamp<sup>®</sup> DNA Stool Mini and QIAamp<sup>®</sup> Fast DNA Stool Mini kits. The modifications included bead beating, pre-treatment of the sample, and transfer of the double amount of volume after cell lysis. In the bead-beating step, different bead types were examined (For details, see Materials and Methods, and Table 1). The alpha diversity (Chao 1 and Shannon index) was determined at OTU-level, and the microbial community composition examined at family-level based on 16S rRNA gene profiling. B) Selected standard and modified DNA extraction protocols were employed to extract DNA from human feces, pig feces, and sewage and their DNA concentration was displayed in a star plot. The values indicate the averages from duplicate extractions.

**TABLE 1. Overview of DNA extraction procedures**

| Extraction Method                                                         | Sample amount (g) | Cell lysis method          | Bead type        | DNA separation                   | Cost pr. extraction (€) <sup>a</sup> | Processing time for 20 samples (h) |
|---------------------------------------------------------------------------|-------------------|----------------------------|------------------|----------------------------------|--------------------------------------|------------------------------------|
| <b>Step 1: Seven commonly used DNA extraction kits</b>                    |                   |                            |                  |                                  |                                      |                                    |
| InnuPure® C16 (Analytic Jena AG) [A]                                      | 0.1               | Chemical, Mechanical, Heat | Ceramic          | Magnetic beads                   | 7.3                                  | 4                                  |
| MagNA Pure LC DNA isolation Kit III (Roche) [A]                           | 0.25              | Chemical, Heat             | -                | Magnetic beads                   | 2.6 <sup>b</sup>                     | 2.5                                |
| Easy-DNA™ gDNA Purification Kit (Invitrogen)                              | 0.25              | Chemical, Enzymatic        | None             | Phenol:Chloroform, Precipitation | 4.5                                  | 8.8                                |
| MP FastDNA™ Spin Kit (MP Biomedicals)                                     | 0.5               | Chemical, Mechanical       | Ceramic & Garnet | Silica membrane-based columns    | 14.1 <sup>c</sup>                    | 5                                  |
| PowerSoil® DNA Isolation kit (MoBio)                                      | 0.25              | Chemical, Mechanical, Heat | Garnet           | Silica membrane-based columns    | 5.3                                  | 5.5                                |
| QIAamp® DNA Stool Mini Kit (Qiagen)                                       | 0.2               | Chemical, Heat             | -                | Silica membrane-based columns    | 5.3                                  | 4                                  |
| QIAamp® DNA Stool Mini Kit (Qiagen) +BB (Lysing Matrix A, MP Biomedicals) | 0.2               | Chemical, Mechanical, Heat | Ceramic & Garnet | Silica membrane-based columns    | 12.7                                 | 4                                  |
| <b>Step 2: New and modified DNA extraction procedures</b>                 |                   |                            |                  |                                  |                                      |                                    |
| QIAamp® DNA Stool Mini Kit (Qiagen) +BB (Garnet Bead Tubes, MoBio)        | 0.2               | Chemical, Mechanical, Heat | Garnet           | Silica membrane-based columns    | 8.5                                  | 3                                  |
| QIAamp Fast DNA Stool Mini                                                | 0.2               | Chemical, Mechanical, Heat | -                | Silica membrane-based columns    | 6.2                                  | 2.6                                |
| QIAamp Fast DNA Stool Mini +BB (Lysing Matrix A, MP Biomedicals)          | 0.2               | Chemical, Mechanical, Heat | Ceramic & Garnet | Silica membrane-based columns    | 13.6                                 | 3                                  |
| QIAamp Fast DNA Stool Mini +BB                                            | 0.2               | Chemical, Mechanical,      | Glass            | Silica membrane-based columns    | 10                                   | 3                                  |

|                                                                              |     |                                  |                      |                                   |     |   |
|------------------------------------------------------------------------------|-----|----------------------------------|----------------------|-----------------------------------|-----|---|
| (Pathogen Lysis Tubes S, Qiagen)                                             |     | Heat                             |                      |                                   |     |   |
| QIAamp Fast DNA Stool Mini +BB<br>(Pathogen Lysis Tubes L, Qiagen)           | 0.2 | Chemical,<br>Mechanical,<br>Heat | Glass                | Silica membrane-<br>based columns | 10  | 3 |
| QIAamp Fast DNA Stool Mini +BB<br>(Garnet Bead Tubes, MoBio)                 | 0.2 | Chemical,<br>Mechanical,<br>Heat | Garnet               | Silica membrane-<br>based columns | 8.5 | 3 |
| QIAamp Fast DNA Stool Mini +BB<br>(Bead Beating Tubes, A&A<br>Biotechnology) | 0.2 | Chemical,<br>Mechanical,<br>Heat | Zirconia /<br>Silica | Silica membrane-<br>based columns | 8.2 | 3 |

[A] Automated procedure

BB Bead beating

<sup>a</sup>Calculations do not include costs for additional laboratory supply, such as pipette tips and reaction tubes.

<sup>b</sup>Excluding costs for special pipette tips and plastic cartridges required for the robot.

<sup>c</sup>Based on price in the USA, excluding general sales tax that is being added in other countries.

## SUPPLEMENTAL MATERIAL

### I) Supplemental Materials and Methods

#### Specimen Collection and Handling

Human fecal specimens were collected from a healthy individual at three time points over a single day. The specimens were kept at 4°C, and transported to the laboratory within 24 hours. Upon arrival, the three samples were pooled and homogenized. For this study, fecal specimens from an infant were chosen, as infant fecal samples often contain a high proportion of Actinobacteria (e.g. Bifidobacteria), from which genomic DNA can be difficult to isolate. Pig fecal specimens were collected from animals at a conventional pig production farm in Denmark. Samples from individual animals were obtained directly after defecation, stored in a cooling box, and transported to the laboratory within four hours. Upon arrival, three random samples were pooled and homogenized. Untreated sewage was collected from the sewage inlet of the Herlev hospital waste water treatment plant, Denmark. Specimens were stored in a cooling box and transported to the laboratory within two hours. Upon arrival 24 x 40 ml sewage samples were sedimented for 10 minutes at 8000xg in an Eppendorf 5810R centrifuge. The sewage pellets were pooled and homogenized. For all three types of specimen (human feces, pig feces, sewage), the homogenized samples were separated into 0.5 g aliquots, respectively. A subset of aliquots for each specimen type was spiked with two bacterial strains (see details below). The individual sample aliquots with and without strain mix were stored at -80°C until further processing.

#### Spiking with strain mix

Subsequent to specimen collection, about half of the aliquots from the human feces, pig feces, and sewage were spiked with a representative of Gram-positive and Gram-negative bacteria, namely *Staphylococcus aureus* ST398 (strain S0385) and *Salmonella enterica* serotype Typhimurium DT104. The strains were cultivated in Luria-Bertani (LB) broth at 37°C. Cells were harvested when the culture reached late exponential growth phase at OD<sub>600</sub> ~0.9. The strain mix was prepared by mixing equal volumes of the bacterial cultures. To determine the number of cells of *S. aureus* ST398 and *Salmonella* Typhimurium DT104 in the two cultures, dilutions of these were plated on LB agar, the plates incubated overnight at 37°C, and colony forming units (CFU) determined the following day. The strain mix was added at about 5% of the volume of the aliquot, and the added cell numbers of *S. aureus* and *S. enterica* Typhimurium were calculated based on the CFU determinations.

#### DNA isolation

In a first step, seven DNA isolation procedures were examined, namely: InnuPure® C16 (Analytic Jena AG), MagNA Pure LC DNA isolation Kit III (Roche), Easy-DNA™ gDNA Purification Kit (Invitrogen), MP FastDNA™ Spin Kit (MP Biomedicals), PowerSoil® DNA Isolation kit (MoBio), QIAamp® DNA Stool

Mini Kit (Qiagen), QIAamp® DNA Stool Mini Kit (Qiagen) +Bead Beating (see Table 1, and details below). These methods were selected because they are widely used and represent a variety of isolation procedures involving manual or automated DNA isolation, DNA separation using filter-columns or magnetic beads, chemical or mechanical lysis, and phenol/chloroform-based or non-chloroform based isolations. Bead-beating steps were performed in a Qiagen TissueLyser II if not stated otherwise, and centrifugation steps were carried out in an Ole Dich 157.MP Microcentrifuge (Denmark). DNA isolation was performed on duplicate or triplicate aliquots, dependent on specimen availability. One to two isolation controls were included at each round of isolation.

*InnuPure® C16, Analytic Jena AG (InnuPURE)*

Automatic isolation with the InnuPURE–C16 robot using the InnuPURE Stool DNA Kit–IP–C16 according to the manufacture’s instructions. Prior to the automatic isolation, a lysis step was performed according to the protocol for lysis of bacterial DNA from stool samples using a SpeedMILL PLUS provided by the manufacturer. The cell disruption process was carried out two times for 30 sec at 50 Hz (50 s<sup>-1</sup>). The DNA was eluted in 100 ul of buffer supplied with the kit.

*MagNA Pure LC DNA isolation Kit III, Roche (MagNAPure)*

Automatic isolation with the MagNA Pure LC instrument using the DNA Isolation Kit III (Bacteria, Fungi) according to the manufacture’s instructions. The pre-isolation step for stool samples described in the protocol was performed before transferring the samples to the MagNA Pure LC. The protocol states a starting amount of a peanut-size sample, and in order to ensure consistency across isolations a starting amount of 0.25 g was chosen. The DNA was eluted in 100 ul of buffer supplied with the kit.

*Easy-DNA™ gDNA Purification Kit, Invitrogen (EasyDNA)*

The DNA isolation was performed according to the manufacturer’s instructions with minor modifications. Pretreatment of the samples were performed following the protocol for small amounts of cells, tissues, or plant leaves. Initially, 0.25 g sample aliquots were dissolved in 1.5 ml 0.9% NaCl, respectively. The samples were centrifuged at 600xg for 3 minutes. The supernatant was transferred to new tubes and centrifuged at 8000xg for 10 minutes. After centrifugation, the supernatant was discarded and the pellet was resuspended in 200 µl PBS. 30 µl lysozyme (10 mg/ml) and 15 µl lysostaphin (10 mg/ml) were added and the samples were incubated at 37°C for 20 minutes shaking at 550 ppm, before adding 30 µl 10% SDS. The final pretreatment step included the addition of 15 µl proteinase K (20 mg/ml) and incubation at 37°C for 20 minutes. The final step in the isolation protocol was prolonged to an incubation for 1.5 (instead of 0.5) hours at 37°C. The DNA was eluted in 100 ul of buffer supplied with the kit.

*MP FastDNA™ Spin Kit, MP Biomedicals (FastDNA)*

The DNA isolation was performed according to the manufacturer’s instructions with minor modifications. A centrifugation step at 3000xg for 2 minutes was

included to ensure proper settling of the silica matrix. The protocol suggested eluting the DNA in 50-100  $\mu$ l DNase/Pyrogen-Free water, and here the DNA was eluted in 100  $\mu$ l.

*PowerSoil<sup>®</sup> DNA Isolation kit, MoBio Laboratories Inc. (PowerSoil.HMP)*

The DNA isolation was performed according to the protocol employed in the Human Microbiome Project (HMP Protocol # 07-001 version 12), with a minor modification to the initial protocol step. The HMP protocol states to resuspend 2 ml fecal sample in 5 ml MoBio lysis buffer. Here, we resuspended 0.5 g sample in 1.25 ml MoBio lysis buffer (i.e. same ratio). Subsequently, the samples were centrifuged according to the HMP protocol and 1 ml of supernatant transferred to a garnet bead tube containing 0.75 ml MoBio buffer. The samples were heated at 65°C for 10 minutes followed by an additional heating step at 95°C for 10 minutes. The samples were processed further according to the HMP protocol including the modification at step 12, where the centrifugation step was prolonged to 2 minutes. The DNA was eluted in 100  $\mu$ l of buffer supplied with the kit.

*QIAamp<sup>®</sup> DNA Stool Mini Kit, Qiagen (QIAstool)*

The DNA isolation was performed according to the manufacturer's protocol for isolation of DNA from stool for pathogen detection with minor modifications. In the lysis step, the samples were first heated at 70°C for 5 minutes and subsequently at 95°C for 5 minutes. The DNA was eluted in 100  $\mu$ l elution buffer.

*QIAamp<sup>®</sup> DNA Stool Mini Kit, Qiagen +Bead Beating (QIAstool+BB)*

The DNA isolation was performed according to the manufacturer's protocol for isolation of DNA from stool for pathogen detection with minor modifications that included a bead-beating step. Sample aliquots of 0.2 g were mixed with 1.4 ml ASL buffer, respectively, and added to Lysing matrix A bead beating tubes (MP Biomedicals) and were briefly homogenized. The samples were treated in a Qiagen TissueLyser II at 30 f/s (Hz) three times for 30 seconds, with placement of the samples on ice in between bead beating steps. Subsequently, the samples were heated at 95°C for 15 minutes. The remaining steps were carried out according to the manufacturer's recommendations, and the DNA eluted in 100  $\mu$ l elution buffer.

In a second step, a variety of modifications to two Qiagen kits were examined, namely the QIAamp<sup>®</sup> DNA Stool Mini Kit (QIAstool), and QIAamp<sup>®</sup> Fast DNA Stool Mini Kit (QIAFast). The latter was released to the market during the course of this study. The main difference between the QIAstool and the QIAFast kits relies in the way inhibitor compounds are being removed. In the QIAstool kit, InhibitEX tablets are being dissolved in the samples that are adsorbing the inhibitors and together are removed via centrifugation. The QIAFast kit contains an InhibitEX buffer to remove inhibitor compounds, and no tablets are required.

*QIAamp<sup>®</sup> DNA Stool Mini Kit, Qiagen and Modifications*



Five different protocols based on the QIAamp<sup>®</sup> DNA Stool Mini Kit were examined. i) QIAStool: see above, ii) QIAStool+BB.LMA: QIAStool+BB procedure using Lysing matrix A tubes (see above), iii) QIAStool+BB.LMA+2Trans: QIAStool+BB procedure using Lysing matrix A tubes (see above) with modifications. To reduce the loss of sample, the double amount of supernatant was transferred to proteinase K (i.e. 400  $\mu$ l instead of 200  $\mu$ l). The volumes of Proteinase K, buffer AL and ethanol were doubled, respectively. Due to the increased volume, the passing of the sample through the spin columns is performed in two centrifugation steps. The DNA was washed twice before elution in 100  $\mu$ l elution buffer. iv) QIAStool+PreT+BB.LMA: QIAStool+BB procedure using Lysing matrix A tubes (see above) with modifications. An increased starting sample amount was used and pre-treated. 0.5g of sample was mixed with 1.5 ml 0.9% NaCl solution. After homogenization by vortexing, the samples were centrifuged at 600 x g for 3 minutes to settle large particles. The supernatant was centrifuged at 8000 x g for 10 minutes to pellet microbial cells. The pellet was resuspended in 200  $\mu$ l PBS and transferred to Lysing Matrix A bead beating tubes. v) QIAStool+PreT+BB.LMA+2Trans: QIAStool+BB procedure using Lysing matrix A tubes (see above) with modifications described in iii) and iv).

#### *QIAamp<sup>®</sup> Fast DNA Stool Mini Kit, Qiagen and Modifications*

Six different protocols (i–vi) based on the QIAamp<sup>®</sup> Fast DNA Stool Mini Kit were examined using five different bead types (ii–vi). i) QIAFast: The DNA isolation was performed according to the manufacturer's protocol for isolation of DNA from stool for pathogen detection with minor modifications. In the lysis-step, the samples were first heated at 70°C for 5 minutes and subsequently at 90°C for 5 minutes. The DNA was eluted in 100  $\mu$ l elution buffer for 2 minutes. ii) QIAFast+BB.LMA+2Trans: The DNA isolation was performed according to the manufacturer's protocol for isolation of DNA from stool for pathogen detection with minor modifications that included a bead-beating step. Sample aliquots of 0.2 g were mixed with 1 ml InhibitEX buffer, respectively, and added to Lysing matrix A bead beating tubes (MP Biomedicals) and are briefly homogenized. The samples are treated in a Qiagen TissueLyser II at 30 f/s (Hz) three times for 30 seconds, with placement of the samples on ice in between bead beating steps. Subsequently, the samples are heated at 95°C for 7 minutes. Similar to the modifications described above, following the bead-beating and heating steps, the double amount of supernatant was transferred to proteinase K (i.e. 400  $\mu$ l instead of 200  $\mu$ l). The volumes of proteinase K, Buffer AL and ethanol were also doubled. The passing of the sample through the filter columns were subsequently carried out in two centrifugation steps rather than one, to accommodate the increased sample volume. The remaining steps were carried out according to the manufacturer's recommendations, and the DNA eluted in 100  $\mu$ l elution buffer. A laboratory protocol for this procedure can be found at <https://dx.doi.org/10.6084/m9.figshare.3475406.v1>. iii) QIAFast+BB.LTS+2Trans: Same procedure as described in ii) with Pathogen Lysis Tubes S (Qiagen). iv) QIAFast+BB.LTL+2Trans: Same procedure as described in ii) with Pathogen Lysis Tubes L (Qiagen). v) QIAFast+BB.GBT+2Trans: Same procedure as

described in ii) with Garnet Bead Tubes (MoBio). vi) QIAFast+BB.AAB+2Trans: Same procedure as described in ii) with A&A Bead Tubes (A&A Biotechnology, Gdynia, Poland).

Together, the evaluation and improvements of DNA isolation methods were carried out in a step-wise approach. In the first step, seven DNA extraction kits were evaluated using human feces, pig feces, and hospital sewage (Figures 1–4, Supplemental Figures S1-S4, and Supplemental Tables S1+S2). The standard and modified procedures based on the QIAStool and QIAFast methods were tested using a second set of pig fecal samples (Figure 5A, and Supplemental Figure S5, and Supplemental Table S3). Upon evaluation of the different DNA isolation methods, promising procedures were selected and examined using a new set of human feces, pig feces, and hospital sewage (Figure 5B).

### **DNA quantitation and quality assessment**

Subsequent to DNA isolation, the DNA was portioned into 10 µl aliquots to prevent repeated freeze-thawing cycles, and stored at -20°C. DNA concentrations were measured using Qubit® dsDNA BR Assay Kit on a Qubit® 2.0 Fluorometer (Invitrogen, Carlsbad, CA). As DNA extracts can contain contaminants, such as proteins or other organic molecules that can affect downstream procedures such as DNA amplifications in PCR, we determined the DNA purity by measuring the ratios of absorbance at 260/280 and 260/230, respectively, using a NanoDrop 1000 Spectrophotometer (Thermo Scientific, Pittsburgh, USA). DNA extracts with a 260/280 ratio between ~1.7 to ~2.0, and 260/230 ratio between ~2.0 to ~2.2 are regarded as “pure”. The stability of the DNA in the extracts was determined by measuring the DNA concentration after 2 and 7 days incubation at 22°C. A decrease in DNA concentration over time can indicate the presence of DNases in the extract.

### **16S rRNA gene profiling**

16S rRNA amplicon libraries were generated using a two-step protocol similar as described in Part # 15044223 Rev. B by Illumina ([http://www.illumina.com/content/dam/illumina-support/documents/documentation/chemistry\\_documentation/16s/16s-metagenomic-library-prep-guide-15044223-b.pdf](http://www.illumina.com/content/dam/illumina-support/documents/documentation/chemistry_documentation/16s/16s-metagenomic-library-prep-guide-15044223-b.pdf)). In a first PCR, the V4 region of the 16S rRNA genes were amplified using the universal primers (515f 5'-TGCCAGCAGCCGCGGTAATAC (1) and 806r 5'-GGACTACNNGGTATCTAAT (2)). Each 20-µl PCR reaction contained 2 µl of 10 x AccuPrime PCR Buffer II (15mM MgCl<sub>2</sub>, Invitrogen), 1 µl (10 µM) of the primers, 0.12 µl AccuPrime Taq DNA polymerase (2 units/µl, Invitrogen), 1 µl template DNA and 14.88 µl ddH<sub>2</sub>O. PCR conditions: denaturation at 94°C for 2 min; 30 cycles at 94°C for 20 s, 56°C for 20 s, 68°C for 30 s; followed by 68°C for 5 min, and 3 min at 70 °C. Subsequently, the PCR products were placed on ice to prevent hybridization between PCR products and nonspecific amplicons. Samples were quantified using Quant-iT™ PicoGreen® dsDNA Assay Kit (Invitrogen, Carlsbad, CA) on a Lightcycler 96 (Roche, Mannheim, Germany) and adjusted to equal concentrations. In the second PCR the same conditions were

used as in the first round, except the PCR was reduced to 15 cycles and the primers had a unique adaptor/linker/index sequence per sample (3). The PCR products were purified using Agencourt AmPure XP beads (Beckman Coulter Inc, A63881), and concentrations were measured using Quant-iT™ PicoGreen® dsDNA Assay Kit on a Lightcycler 96. The samples were pooled in equal concentrations, and concentrated using 'DNA clean and concentrator-5 kit' (Zymo Research, Orange, CA). Paired-end 2 × 250 bp sequencing of barcoded amplicons was performed on a MiSeq machine running v2 chemistry (Illumina Inc., San Diego, CA, USA) at University of Copenhagen, Section of Microbiology.

The primer sequences were trimmed, quality filtering performed, and paired sequences assembled using the UPARSE pipeline (4). Low quality reads were removed with a maximum expected error threshold of 0.5 (maxee). Sequences were barcoded and pooled before dereplication and removal of duplicates (-minseqlength 64). Prior to clustering of the OTUs the dereplicated reads were sorted according to abundance, and singletons were removed. Chimera filtering was performed using UCHIME (5) with rdp\_gold.fa as reference database. The reads were mapped back to OTUs, including singletons, at a 97% identity level and an OTU-table was generated using uc2otutab.py. Using QIIME1.8.0 (6), taxonomy was assigned with uclust using assign\_taxonomy.py based on the Greengenes 13.8 reference database. The average number of reads per sample was 192965, and the read length was between 186-251 bp. The average number of reads in the isolation controls was 34063 and the majority of these reads were affiliated with the two strains used for spiking (Enterobacteriaceae and Staphylococcaceae), as well as dominant taxa that were present in the complex samples, such as Ruminococcaceae, Prevotellaceae, and Bacteroidales. Ecological diversity estimates and microbial community comparisons were performed using the relevant scripts provided by QIIME, phyloseq, and R (6-8). For the estimation of bacterial diversity and richness (Fig. 1C, and Fig. 5A), and principal coordinate analysis (Fig. 2A-C, and Fig. S3) the samples were rarefied to 800 reads per sample. The abundance of Gram-positive and Gram-negative bacteria was predicted at order levels based on information from the literature. For some bacteria (mainly Firmicutes), the Gram status could not be assigned at this level, and for those the family level was used instead.

### **Metagenomics**

A subset of thirty-nine DNA extracts was subjected to metagenomic sequencing. The samples were prepared and sequenced following the Nextera XT DNA Library Preparation Guide for the MiSeq system, Part # 15031942 Rev. D ([http://support.illumina.com/content/dam/illumina-support/documents/documentation/chemistry\\_documentation/samplepreps\\_nextera/nextera-xt/nextera-xt-library-prep-guide-15031942-01.pdf](http://support.illumina.com/content/dam/illumina-support/documents/documentation/chemistry_documentation/samplepreps_nextera/nextera-xt/nextera-xt-library-prep-guide-15031942-01.pdf)), using paired-end v2 2×250bp sequencing. The taxonomic microbiome compositions were determined through the use of the MGmapper pipeline (9). The MGmapper package is available for download at [www.cbs.dtu.dk/public/MGmapper/](http://www.cbs.dtu.dk/public/MGmapper/). The analysis consisted of three main steps: i) Pre-processing and quality trimming of raw reads, ii) Mapping of reads to

reference sequence databases, and iii) Analysis of read count data. In the first step, cutadapt (10) was employed for adapter sequence removal, trimming of low-quality bases from the ends of the reads (-q 30), and removal of reads that were shorter than 30 bp. In a second step, the remaining paired-end reads were mapped in chain-mode to four databases: 1. complete bacterial genomes, 2. draft bacterial genomes, 3. MetaHit Assembly (<http://www.sanger.ac.uk/resources/downloads/bacteria/metahit/>, July 2014), and 4. Human Microbiome assembly ([http://www.hmpdacc.org/resources/data\\_browser.php](http://www.hmpdacc.org/resources/data_browser.php), July 2014) using the BWA-MEM algorithm (<http://bio-bwa.sourceforge.net>). For the analysis in the present study only the reads mapping to the two primary bacterial databases (complete and draft bacterial genomes) were considered. These two databases were composed of 2685 complete and 22224 draft bacterial and archaeal genomes obtained from Genbank on July 2014 and December 2014, respectively. The order by which the databases are specified in chain-mode is important, as reads that exhibit a significant hit to the previous reference database are removed before mapping to the next database. Samtools (10) was used to remove singletons and all reads that did not map as pairs. An alignment of a read pair with a region in a genome was considered a hit only if the sum of the alignment scores (SAS) was higher than any SAS values from other hits in the database. In the third step, the alignments were filtered based on the Fraction of Matches+Mismatches (FMM) threshold, i.e. the fraction of a read that should align. Here, the default FMM threshold of 80% was used. From 96 155 142 raw read pairs, 7 567 574 read pairs mapped genomes in the two reference databases. The final read count table was composed of 9436 bacterial and archaeal reference strains with an average of 69952 mapped read pairs per sample. For each sample, the read counts were normalized according to the genome length of the respective genomes in the database, and for sequencing depth using total sum scaling.

### **Differential abundance analysis**

In order to test for the differential abundance of taxa that may drive the differences observed between the communities derived from the different DNA isolation procedures, we performed DESeq2 analyses. The (unnormalized) read count tables from the 16S rRNA gene profiling and metagenomics sequence analysis, respectively, were aggregated to the family level in R (v. 3.2.3, 64bit) (8) We performed an analysis that allows for varied sequencing depth, similar as suggested previously (12), and carried out two-sided Wald tests as implemented in the DESeq2 package (v. 1.10.1) (13). The size factors were determined by DESeq2 from the read count tables. An example for such an analysis is available from <https://figshare.com/s/99fc2ac5e1ed54fa641c>.

When testing the effect of added strain mix, we included the samples to which the strain mix was added as well as the corresponding samples to which no strain mix was added and accounted for DNA isolation method and sample matrix type. When testing the effects of the DNA isolation method, we analyzed the data from the three types of fecal specimen separately and extracted results from all two-wise comparisons of DNA isolation methods. For each DESeq2 test,

p-values were adjusted for the false-discovery rate (FDR) using the Benjamini-Hochberg procedure (14). As recommended by DESeq2, comparisons with an FDR below 0.1 were considered significant. For the visualization of the data, the read count data were variance-stabilized using the DESeq2 regularized log (rlog) transformation. This transformation also accounts for sequencing depth differences, allowing inter-sample comparisons of taxa.

### **Quantification of strain mix**

The samples that were spiked with the strain mix composed of *S. enterica* Typhimurium DT104 and *S. aureus* ST398 were extracted, sequenced, and analyzed together with the non-spiked samples. For each type of specimen and isolation method, the relative abundance of Enterobacteriaceae and Staphylococcaceae for 16S rRNA gene profiling and metagenomics, respectively, were determined. Our differential abundance analysis using DESeq2 confirmed, that these two strains were present in significantly higher abundance in the spiked samples than in the not spiked samples for 16S rRNA gene profiling: Enterobacteriaceae adjusted P-value  $3.08^{-30}$  and Staphylococcaceae adjusted P-value  $2.13^{-10}$ ; and for metagenomics: Enterobacteriaceae adjusted P-value  $1.74^{-77}$  and Staphylococcaceae adjusted P-value  $1.07^{-4}$ . The average relative abundance values from the samples without added strain mix were subtracted from the corresponding samples to which the strain mix was added. Subsequently, the 16S rRNA gene copy numbers of the two added strains were taken into account with 5 for *S. aureus* and 7 for *S. enterica* (for 16S rRNA gene profiling). The ratios between Enterobacteriaceae and Staphylococcaceae were determined for each sample matrix and isolation method, and compared to the *S. enterica* Typhimurium DT104 / *S. aureus* ST398 ratio of CFU that were added to the original samples.



## II) Supplemental Figures

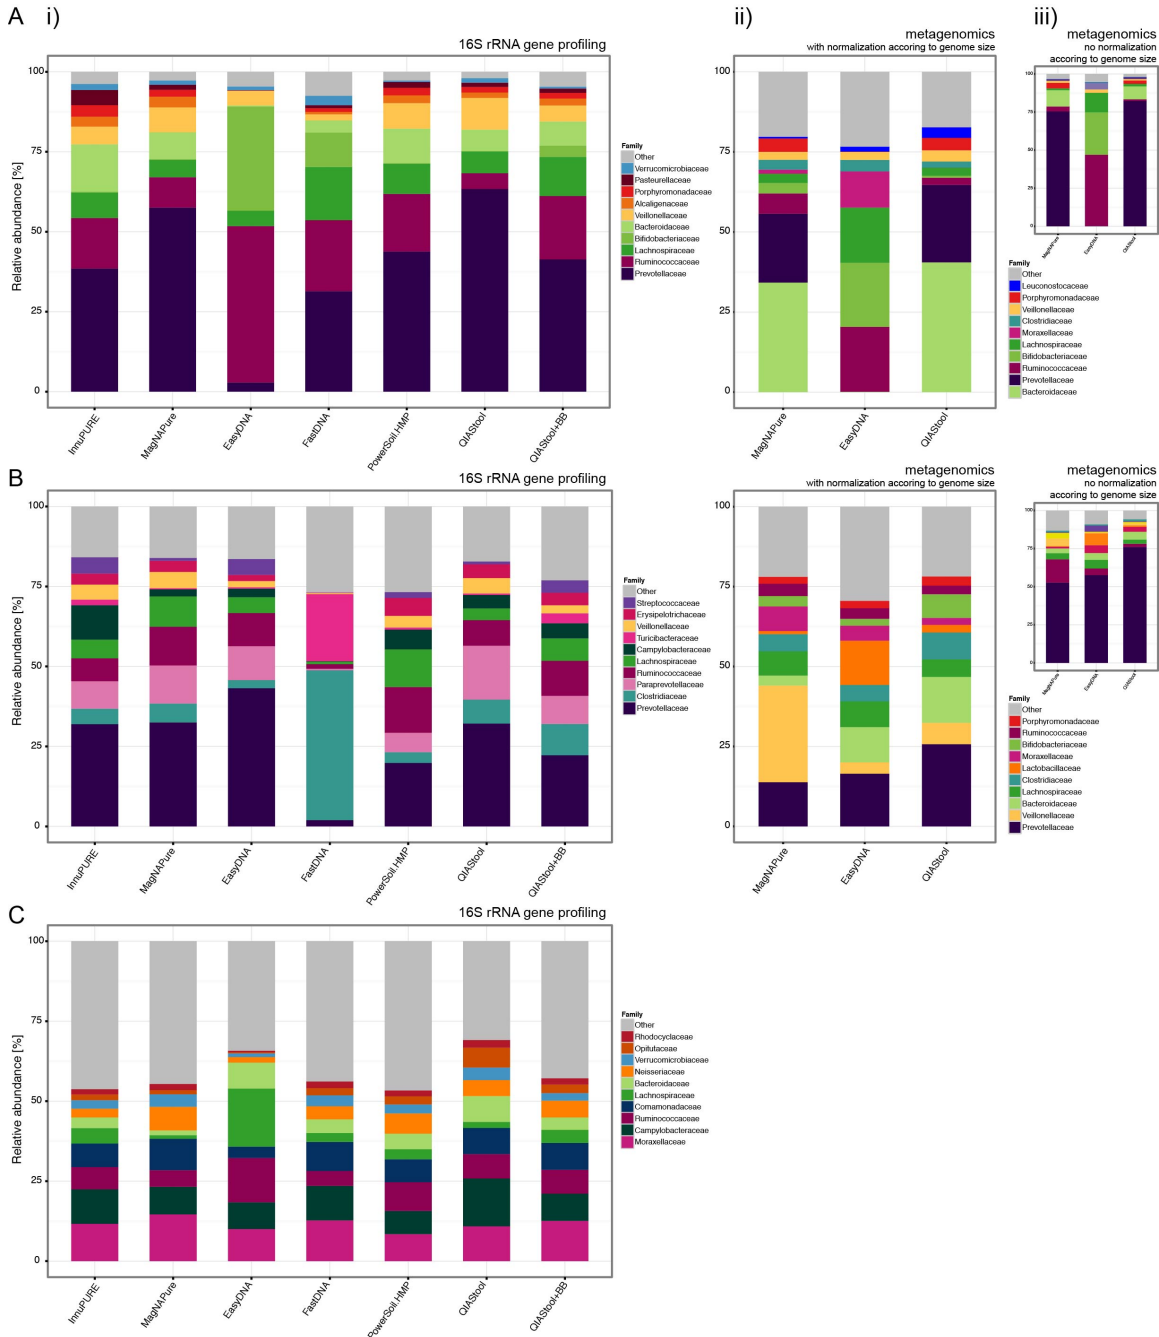

**FIG S1. Microbial community composition.** The Top 10 most abundant families for the human fecal (A), pig fecal (B), and hospital sewage (C) samples based on (i) 16S rRNA gene profiling, (ii) metagenomics analysis that include normalization based on reference genome size, and (iii) metagenomics analysis without normalization according

to genome size. For details regarding sequence data analysis and normalization see Materials and Methods.

*Impact of Sample Type and DNA Isolation Procedure on Genomic Inference of Microbiome Composition*

Knudsen *et al.*

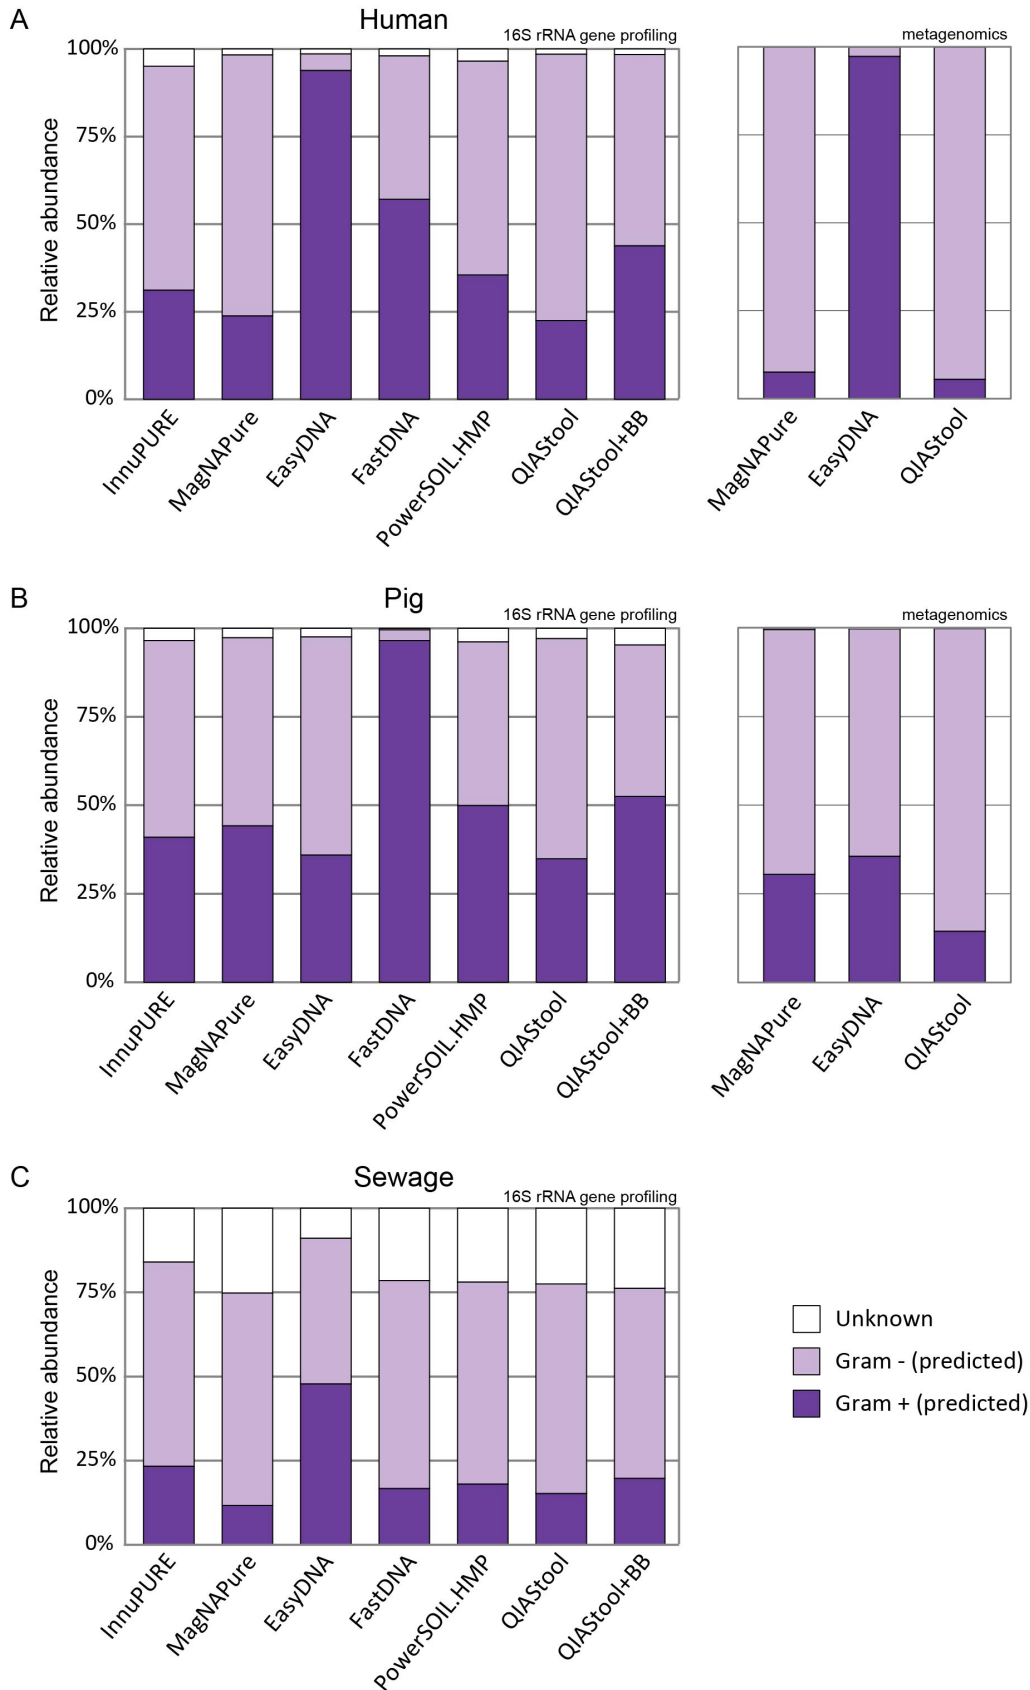



**FIG S2. Microbial community composition based on predicted Gram-staining.** Gram-positive and Gram-negative affiliations were assigned at the order-level based on information found in the literature. For some taxa the Gram-staining status was unknown.

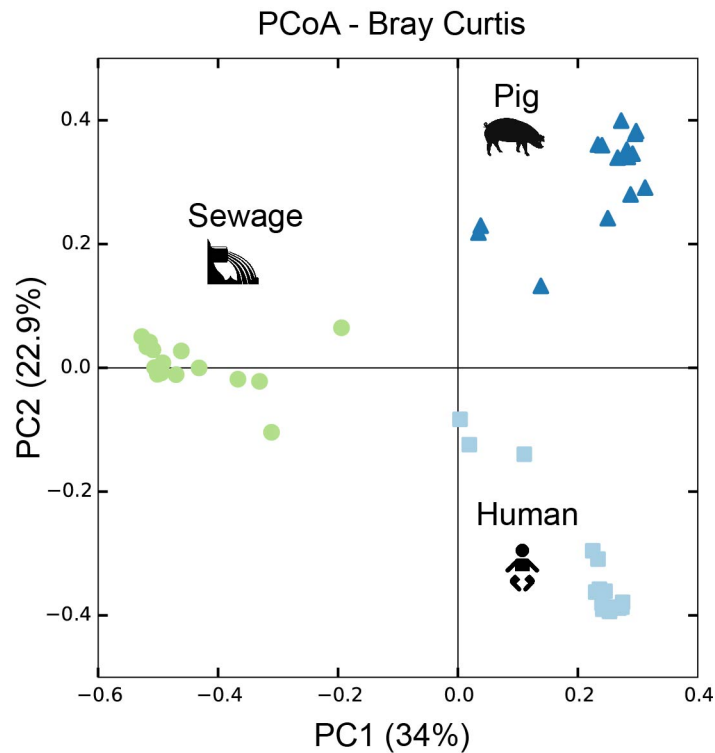

**FIG S3. Microbial community dissimilarity.** The dissimilarity between the microbiotas from the human, pig, and sewage samples was examined using Principal Coordinates Analysis of Bray-Curtis distances based on the 16S rRNA gene count data. For the PCoA Bray-Curtis ordination analysis only samples with a minimum of 800 reads were included.

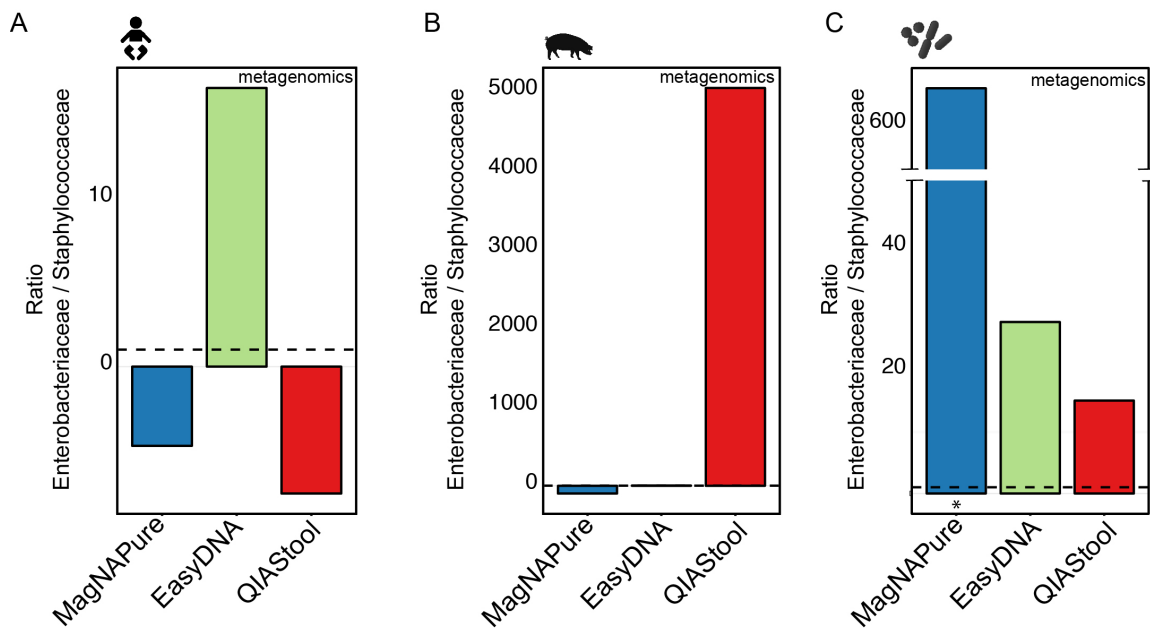

**FIG S4. Detection of spiked bacteria using metagenomics.** The human fecal (A), and pig fecal (B) samples were spiked with a strain mix composed of *Salmonella enterica* serotype Typhimurium DT104 and *Staphylococcus aureus* ST398 in a CFU ratio of 1.02. These two sample matrices, as well as aliquots of the strain mix (C) were extracted using three different DNA extraction methods. The two strains were detected by metagenomics analysis, and their ratios determined. For details, see Materials and Methods. An asterisk indicates that the values for the particular DNA extraction of the strain mix (D) are based on single measurements. All other values are based on averages from duplicate or triplicate measurements. The dashed line indicates the ratio of the strain mix based on CFU determinations.

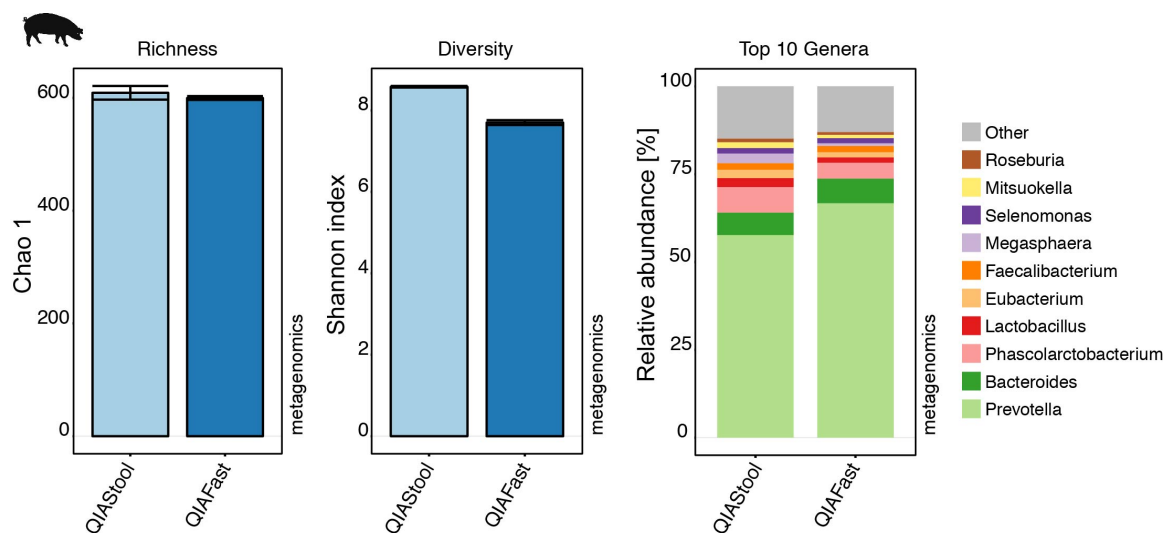

**FIG 5. Comparison between QIAStool and QIAFast DNA extraction methods by metagenomics.** Pig feces was extracted using the QIAamp<sup>®</sup> DNA Stool Mini and QIAamp<sup>®</sup> Fast DNA Stool Mini kits, and analyzed using metagenomics. The alpha diversity (Chao 1 and Shannon index) was determined at species-level. The microbial community composition was examined at genus-level and the relative abundance of the Top 10 most abundant taxa are shown here.

## Supplemental References

1. **Yu Y, Lee C, Kim J, Hwang S.** 2005. Group-specific primer and probe sets to detect methanogenic communities using quantitative real-time polymerase chain reaction. *Biotechnol Bioeng* **89**:670–679.
2. **Sundberg C, Al-Soud WA, Larsson M, Alm E, Yekta SS, Svensson BH, Sørensen SJ, Karlsson A.** 2013. 454 pyrosequencing analyses of bacterial and archaeal richness in 21 full-scale biogas digesters. *FEMS Microbiology Ecology* **85**:612–626.
3. **Riber L, Poulsen PHB, Al-Soud WA, Skov Hansen LB, Bergmark L, Brejnrod A, Norman A, Hansen LH, Magid J, Sørensen SJ.** 2014. Exploring the immediate and long-term impact on bacterial communities in soil amended with animal and urban organic waste fertilizers using pyrosequencing and screening for horizontal transfer of antibiotic resistance. *FEMS Microbiology Ecology* **90**:206–224.
4. **Edgar RC.** 2013. UPARSE: highly accurate OTU sequences from microbial amplicon reads. *Nature Methods* **10**:996–998.
5. **Edgar RC, Haas BJ, Clemente JC, Quince C, Knight R.** 2011. UCHIME improves sensitivity and speed of chimera detection. *Bioinformatics* **27**:2194–2200.
6. **Caporaso JG, Kuczynski J, Stombaugh J, Bittinger K, Bushman FD, Costello EK, Fierer N, Peña AG, Goodrich JK, Gordon JI, Huttley GA, Kelley ST, Knights D, Koenig JE, Ley RE, Lozupone CA, McDonald D, Muegge BD, Pirrung M, Reeder J, Sevinsky JR, Turnbaugh PJ, Walters WA, Widmann J, Yatsunenko T, Zaneveld J, Knight R.** 2010. QIIME allows analysis of high-throughput community sequencing data. *Nature Methods* **7**:335–336.
7. **McMurdie PJ, Holmes S.** 2013. phyloseq: An R Package for Reproducible Interactive Analysis and Graphics of Microbiome Census Data. *PLoS ONE* **8**:e61217.
8. **Team RDC.** 2014. R: A Language and Environment for Statistical Computing. R Foundation for Statistical Computing, Vienna, Austria.
9. **Petersen TN, Bælum J, Lukjancenko O, Geertz-Hansen HM, Thomsen MCF, Sperotto MM, Lund O, Aarestrup FM, Sicheritz-Ponten T.** 2015. MGmapper: an automated pipeline for mapping and stratification of metagenomics sequence data. Submitted.
10. **Martin M.** 2011. Cutadapt removes adapter sequences from high-throughput sequencing reads. *EMBnetjournal* **17**:10–12.
11. **Li H, Handsaker B, Wysoker A, Fennell T, Ruan J, Homer N, Marth G, Abecasis G, Durbin R, 1000 Genome Project Data Processing Subgroup.** 2009. The Sequence Alignment/Map format and SAMtools. *Bioinformatics*

25:2078–2079.

12. **McMurdie PJ, Holmes S.** 2014. Waste Not, Want Not: Why Rarefying Microbiome Data Is Inadmissible. *PLOS Computational Biology* **10**:e1003531.
13. **Love MI, Huber W, Anders S.** 2014. Moderated estimation of fold change and dispersion for RNA-seq data with DESeq2. *Genome Biology* **15**:31.
14. **Benjamini Y, Hochberg Y.** 1995. Controlling the False Discovery Rate: a Practical and Powerful Approach to Multiple Testing. *Journal of the Royal Statistical Society Series B (Methodological)* **57**:289–300.

Table S1A. DNA concentration, purity, and stability.

| DNA extraction method*                | HUMAN                     |      |                |      |                 |                                  |                   |                        |                   |      | PIG                       |       |                |      |                                  |       |                        |      | SEWAGE                    |      |                |      |                                  |      |                        |      |                   |      |       |      |
|---------------------------------------|---------------------------|------|----------------|------|-----------------|----------------------------------|-------------------|------------------------|-------------------|------|---------------------------|-------|----------------|------|----------------------------------|-------|------------------------|------|---------------------------|------|----------------|------|----------------------------------|------|------------------------|------|-------------------|------|-------|------|
|                                       | Nucleic acid quantitation |      |                |      |                 | DNA stability at 22 degree C**** |                   |                        |                   |      | Nucleic acid quantitation |       |                |      | DNA stability at 22 degree C**** |       |                        |      | Nucleic acid quantitation |      |                |      | DNA stability at 22 degree C**** |      |                        |      |                   |      |       |      |
|                                       | DNA concentration         |      | DNA Purity     |      |                 | DNA conc. after 2 days           |                   | DNA conc. after 7 days |                   |      | DNA concentration         |       | DNA Purity     |      | DNA conc. after 2 days           |       | DNA conc. after 7 days |      | DNA concentration         |      | DNA Purity     |      | DNA conc. after 2 days           |      | DNA conc. after 7 days |      |                   |      |       |      |
|                                       | DNA conc. [ng/ul]         | SE   | DNA A260/280** | SE   | DNA A260/230*** | SE                               | DNA conc. [ng/ul] | SE                     | DNA conc. [ng/ul] | SE   | DNA conc. [ng/ul]         | SE    | DNA A260/280** | SE   | DNA A260/230***                  | SE    | DNA conc. [ng/ul]      | SE   | DNA conc. [ng/ul]         | SE   | DNA A260/280** | SE   | DNA A260/230***                  | SE   | DNA conc. [ng/ul]      | SE   | DNA conc. [ng/ul] | SE   |       |      |
| A InnuPURE Stool DNA [A]              | 2.23                      | 0.73 | 2.15           | 0.23 | 1.19            | 0.54                             | ND                | ND                     | ND                | ND   | 13.3                      | 0.7   | 1.99           | 0.03 | 1.81                             | 0.01  | ND                     | ND   | ND                        | ND   | <0.01          | -    | <0                               | 3.22 | 1.28                   | 0.36 | ND                | ND   | ND    | ND   |
| E MagNA Pure LC DNA isolation Kit [A] | 42.45                     | 9.45 | 1.52           | 0.01 | 0.75            | 0.02                             | 33.75             | 3.15                   | 33.35             | 0.65 | 4.66                      | 4.65  | 1.62           | 0.14 | 0.83                             | 0.09  | 9.88                   | 0.22 | 9.69                      | 0.28 | 13.75          | 1.55 | 1.76                             | 0.16 | 1.12                   | 0.11 | 13.35             | 0.75 | 14.15 | 0.55 |
| G Easy-DNA™ gDNA Purification Kit     | 78.27                     | 4.48 | 1.97           | 0.01 | 2.02            | 0.02                             | 61.93             | 15.3                   | 33.47             | 6.3  | 50.43                     | 8.29  | 1.77           | 0.02 | 1.55                             | 0.06  | 68.7                   | 5.07 | 74.57                     | 4.14 | 6.19           | 1.32 | 1.77                             | 0.03 | 0.53                   | 0.07 | 4.85              | 0.92 | 4.5   | 0.71 |
| C MP FastDNA™ Spin Kit                | 11.7                      | 0.4  | 2              | 0.03 | 0.36            | 0.05                             | ND                | ND                     | ND                | ND   | 14                        | 0.4   | 1.92           | 0.03 | 0.98                             | 0.09  | ND                     | ND   | ND                        | ND   | 1.5            | 0.07 | 2.4                              | 0.27 | 0.02                   | 0    | ND                | ND   | ND    | ND   |
| B PowerSoil® DNA Isolation kit        | 1.85                      | 0.1  | 1.46           | 0.02 | 1.46            | 0.02                             | ND                | ND                     | ND                | ND   | 1.24                      | 0.24  | 1.52           | 0.1  | 0.41                             | 0.005 | ND                     | ND   | ND                        | ND   | <0.01          | -    | 1.96                             | 0.34 | 0.53                   | 0.06 | ND                | ND   | ND    | ND   |
| F QIAamp® DNA Stool Mini Kit          | 30.43                     | 1.22 | 2.08           | 0.02 | 1.73            | 0.07                             | 28.33             | 0.24                   | 28.07             | 0.55 | 25.33                     | 0.64  | 1.98           | 0.02 | 1.38                             | 0.07  | 23.6                   | 0.72 | 23.5                      | 0.78 | <0.01          | -    | 2.25                             | 0.07 | 0.26                   | 0.02 | <0.01             | -    | <0.01 | -    |
| D QIAamp® DNA Stool Mini Kit +BB      | 13.35                     | 1.25 | 1.98           | 0.12 | 0.75            | 0.12                             | ND                | ND                     | ND                | ND   | 26.75                     | 13.03 | 2.06           | 0.08 | 1.03                             | 0.18  | ND                     | ND   | ND                        | ND   | 1.2            | 0.04 | 2.48                             | 0.24 | 0.17                   | 0.02 | ND                | ND   | ND    | ND   |

\*Duplicate sample aliquods were extracted using procedure A, B, C, D, E. Triplicate sample aliquods were extracted using procedure F, G.

\*\* Expected ~1.7 to ~ 2.0

\*\*\* Expected ~2.0 to ~2.2

\*\*\*\*Expected >95% after 2-7 days incubation at room temperature

ND=Not determined

Table S1B. Microbiome richness and diversity.

|                           |                                     | HUMAN                   |       |               |      |              |       |               |      | PIG                     |       |                 |      |              |       |                 |      | SEWAGE                  |       |                 |      |              |    |                 |    |
|---------------------------|-------------------------------------|-------------------------|-------|---------------|------|--------------|-------|---------------|------|-------------------------|-------|-----------------|------|--------------|-------|-----------------|------|-------------------------|-------|-----------------|------|--------------|----|-----------------|----|
|                           |                                     | 16S rRNA gene profiling |       |               |      | Metagenomics |       |               |      | 16S rRNA gene profiling |       |                 |      | Metagenomics |       |                 |      | 16S rRNA gene profiling |       |                 |      | Metagenomics |    |                 |    |
|                           |                                     | Richness                |       | Diversity     |      | Richness     |       | Diversity     |      | Richness                |       | Alpha Diversity |      | Richness     |       | Alpha Diversity |      | Richness                |       | Alpha Diversity |      | Richness     |    | Alpha Diversity |    |
| DNA extraction procedure* |                                     | Chao1                   | SE    | Shannon index | SE   | Chao1        | SE    | Shannon index | SE   | Chao1                   | SE    | Shannon index   | SE   | Chao1        | SE    | Shannon index   | SE   | Chao1                   | SE    | Shannon index   | SE   | Chao1        | SE | Shannon index   | SE |
| A                         | InnuPURE Stool DNA [A]              | 151.25                  | 0.58  | 4.56          | 0.07 | ND           | -     | ND            | -    | 320.78                  | 9.46  | 5.82            | 0.08 | ND           | -     | ND              | -    | 577.67                  | -     | 7.09            | -    | ND           | -  | ND              | -  |
| E                         | MagNA Pure LC DNA isolation Kit [A] | 134.59                  | 9.21  | 3.62          | 0.36 | 250.34       | 12.44 | 2.26          | 0.14 | 387.82                  | 22.04 | 6.52            | 0.02 | 616.45       | 45.79 | 4.84            | 0.11 | 455.71                  | 7.69  | 6.78            | 0.09 | ND           | -  | ND              | -  |
| G                         | Easy-DNA™ gDNA Purification Kit     | 90.52                   | 14.66 | 3.88          | 0.18 | 309.43       | 9.75  | 3.90          | 0.02 | 302.63                  | 20.15 | 5.88            | 0.14 | 593.61       | 12.94 | 4.52            | 0.11 | 501.08                  | 18.01 | 6.83            | 0.11 | ND           | -  | ND              | -  |
| C                         | MP FastDNA™ Spin Kit                | 161.82                  | 5.33  | 5.02          | 0.14 | ND           | -     | ND            | -    | 109.9                   | 7.52  | 3.37            | 0.06 | ND           | -     | ND              | -    | 499.81                  | 7.48  | 6.96            | 0.02 | ND           | -  | ND              | -  |
| B                         | PowerSoil® DNA Isolation kit        | 160.9                   | -     | 4.38          | -    | ND           | -     | ND            | -    | 431.11                  | 17.86 | 6.77            | 0.16 | ND           | -     | ND              | -    | 505.42                  | 47.02 | 6.71            | 0.12 | ND           | -  | ND              | -  |
| F                         | QIAamp® DNA Stool Mini Kit          | 117.04                  | 2.34  | 3.2           | 0.02 | 243.49       | 8.37  | 1.83          | 0.02 | 355.07                  | 1.14  | 6.33            | 0.02 | 508.55       | 4.61  | 3.48            | 0.11 | 483.96                  | 7.48  | 6.7             | 0.01 | ND           | -  | ND              | -  |
| D                         | QIAamp® DNA Stool Mini Kit +BB      | 169.69                  | 8.62  | 4.59          | 0.01 | ND           | -     | ND            | -    | 373.97                  | -     | 6.36            | -    | ND           | -     | ND              | -    | 503.87                  | 18.27 | 6.97            | 0.18 | ND           | -  | ND              | -  |

\*Duplicate sample aliquods were extracted using procedure A, B, C, D, E. Triplicate sample aliquods were extracted using procedure F, G.

ND=Not determined



**Table S2A. Difference abundance of families - Human fecal microbial community**

| baseMean   | log2FoldChai | lfcSE      | stat       | pvalue   | padj     | family              | compare                  |
|------------|--------------|------------|------------|----------|----------|---------------------|--------------------------|
| 8087.80815 | 9.58965882   | 0.59563182 | 16.0999775 | 2.55E-58 | 7.49E-57 | Bifidobacteriaceae  | EasyDNA vs QIAStool      |
| 261.894528 | 9.6387835    | 0.59914643 | 16.0875255 | 3.12E-58 | 7.49E-57 | [Mogibacteriaceae]  | EasyDNA vs QIAStool      |
| 261.894528 | 6.9943178    | 0.50812435 | 13.7649727 | 4.14E-43 | 2.19E-41 | [Mogibacteriaceae]  | EasyDNA vs InnuPURE      |
| 261.894528 | 5.98959231   | 0.47453074 | 12.6221376 | 1.59E-36 | 9.88E-35 | [Mogibacteriaceae]  | EasyDNA vs FastDNA       |
| 261.894528 | 5.68437867   | 0.45525408 | 12.4861675 | 8.88E-36 | 4.26E-34 | [Mogibacteriaceae]  | EasyDNA vs QIAStool+BB   |
| 8087.80815 | 8.06288475   | 0.6580903  | 12.251943  | 1.64E-34 | 4.35E-33 | Bifidobacteriaceae  | EasyDNA vs InnuPURE      |
| 8087.80815 | 8.10323384   | 0.66343913 | 12.2139824 | 2.62E-34 | 1.52E-32 | Bifidobacteriaceae  | EasyDNA vs MagNAPure     |
| 261.894528 | 7.46735031   | 0.63949976 | 11.6768617 | 1.67E-31 | 4.85E-30 | [Mogibacteriaceae]  | EasyDNA vs MagNAPure     |
| 195.592384 | 7.11547535   | 0.63330982 | 11.2353782 | 2.73E-29 | 4.37E-28 | Coriobacteriaceae   | EasyDNA vs QIAStool      |
| 8087.80815 | 8.22252999   | 0.81577634 | 10.0793925 | 6.81E-24 | 3.13E-22 | Bifidobacteriaceae  | EasyDNA vs PowerSoil.HMP |
| 118.367167 | 4.14939619   | 0.43086714 | 9.6303379  | 5.95E-22 | 7.14E-21 | Streptococcaceae    | EasyDNA vs QIAStool      |
| 261.894528 | 6.50010878   | 0.67196014 | 9.67335475 | 3.91E-22 | 9.00E-21 | [Mogibacteriaceae]  | EasyDNA vs PowerSoil.HMP |
| 195.592384 | 6.52674567   | 0.70556721 | 9.25035285 | 2.24E-20 | 3.95E-19 | Coriobacteriaceae   | EasyDNA vs InnuPURE      |
| 8087.80815 | 6.05120873   | 0.6598584  | 9.17046551 | 4.71E-20 | 1.70E-18 | Bifidobacteriaceae  | FastDNA vs QIAStool      |
| 750.272969 | -5.5100567   | 0.62548793 | -8.8092135 | 1.26E-18 | 1.67E-17 | Porphyromonadaceae  | EasyDNA vs InnuPURE      |
| 750.272969 | -4.8876587   | 0.57173354 | -8.5488402 | 1.24E-17 | 1.19E-16 | Porphyromonadaceae  | EasyDNA vs QIAStool      |
| 750.272969 | -5.3905037   | 0.62605815 | -8.6102285 | 7.29E-18 | 1.41E-16 | Porphyromonadaceae  | EasyDNA vs MagNAPure     |
| 195.592384 | 6.37027321   | 0.76210202 | 8.35881943 | 6.33E-17 | 9.19E-16 | Coriobacteriaceae   | EasyDNA vs MagNAPure     |
| 195.592384 | 5.59941114   | 0.66873123 | 8.37318631 | 5.61E-17 | 1.35E-15 | Coriobacteriaceae   | EasyDNA vs QIAStool+BB   |
| 14192.9873 | 4.1205321    | 0.50198036 | 8.20855245 | 2.24E-16 | 1.79E-15 | Ruminococcaceae     | EasyDNA vs QIAStool      |
| 3174.43554 | -3.2374316   | 0.4150328  | -7.8004235 | 6.17E-15 | 9.84E-14 | Veillonellaceae     | FastDNA vs QIAStool      |
| 195.592384 | 5.37934136   | 0.69281817 | 7.76443455 | 8.20E-15 | 9.84E-14 | Coriobacteriaceae   | FastDNA vs QIAStool      |
| 8087.80815 | 5.04874196   | 0.65458206 | 7.71292439 | 1.23E-14 | 1.97E-13 | Bifidobacteriaceae  | EasyDNA vs QIAStool+BB   |
| 195.592384 | 7.26194948   | 0.9934254  | 7.31000989 | 2.67E-13 | 4.10E-12 | Coriobacteriaceae   | EasyDNA vs PowerSoil.HMP |
| 188.732855 | -5.3331196   | 0.7367495  | -7.2387149 | 4.53E-13 | 5.25E-12 | [Barnesiellaceae]   | EasyDNA vs MagNAPure     |
| 3052.94009 | -4.8906164   | 0.69105732 | -7.0770053 | 1.47E-12 | 1.56E-11 | Bacteroidaceae      | EasyDNA vs InnuPURE      |
| 3052.94009 | -4.7809223   | 0.6911788  | -6.9170558 | 4.61E-12 | 4.46E-11 | Bacteroidaceae      | EasyDNA vs MagNAPure     |
| 680.114734 | -5.3983716   | 0.79094213 | -6.8252422 | 8.78E-12 | 7.75E-11 | Pasteurellaceae     | EasyDNA vs InnuPURE      |
| 3052.94009 | -4.2181346   | 0.62453115 | -6.754082  | 1.44E-11 | 9.86E-11 | Bacteroidaceae      | EasyDNA vs QIAStool      |
| 750.272969 | -5.1128      | 0.75653447 | -6.7581851 | 1.40E-11 | 1.61E-10 | Porphyromonadaceae  | EasyDNA vs PowerSoil.HMP |
| 3174.43554 | -3.1274017   | 0.45366454 | -6.8936438 | 5.44E-12 | 2.23E-10 | Veillonellaceae     | FastDNA vs MagNAPure     |
| 118.367167 | 3.1468372    | 0.46933577 | 6.70487405 | 2.02E-11 | 2.42E-10 | Streptococcaceae    | EasyDNA vs QIAStool+BB   |
| 188.732855 | -4.4807982   | 0.6822668  | -6.5675161 | 5.12E-11 | 3.07E-10 | [Barnesiellaceae]   | EasyDNA vs QIAStool      |
| 50.0848862 | -6.0497647   | 0.91762758 | -6.5928322 | 4.32E-11 | 3.58E-10 | [Odoribacteraceae]  | EasyDNA vs MagNAPure     |
| 8087.80815 | -4.5409169   | 0.65998484 | -6.8803351 | 5.97E-12 | 5.73E-10 | Bifidobacteriaceae  | QIAStool vs QIAStool+BB  |
| 12.0964552 | 6.19822102   | 0.96500816 | 6.42297263 | 1.34E-10 | 7.13E-10 | Actinomycetaceae    | EasyDNA vs QIAStool      |
| 118.367167 | 3.04916807   | 0.47421688 | 6.429902   | 1.28E-10 | 9.67E-10 | Streptococcaceae    | EasyDNA vs InnuPURE      |
| 750.272969 | -4.0416602   | 0.62575935 | -6.4588091 | 1.06E-10 | 1.01E-09 | Porphyromonadaceae  | EasyDNA vs QIAStool+BB   |
| 50.0848862 | -5.8312903   | 0.91432374 | -6.3777085 | 1.80E-10 | 1.19E-09 | [Odoribacteraceae]  | EasyDNA vs InnuPURE      |
| 8087.80815 | 4.56478376   | 0.72120492 | 6.32938523 | 2.46E-10 | 5.05E-09 | Bifidobacteriaceae  | FastDNA vs MagNAPure     |
| 188.732855 | -4.5085906   | 0.73616033 | -6.1244683 | 9.10E-10 | 5.36E-09 | [Barnesiellaceae]   | EasyDNA vs InnuPURE      |
| 8087.80815 | 4.52443467   | 0.7163253  | 6.31617319 | 2.68E-10 | 6.19E-09 | Bifidobacteriaceae  | FastDNA vs InnuPURE      |
| 195.592384 | 4.79061167   | 0.75894457 | 6.31220231 | 2.75E-10 | 6.19E-09 | Coriobacteriaceae   | FastDNA vs InnuPURE      |
| 261.894528 | -3.9544048   | 0.64127777 | -6.1664462 | 6.98E-10 | 3.35E-08 | [Mogibacteriaceae]  | QIAStool vs QIAStool+BB  |
| 3174.43554 | 2.51360524   | 0.41567177 | 6.04709158 | 1.47E-09 | 4.57E-08 | Veillonellaceae     | EasyDNA vs FastDNA       |
| 680.114734 | -4.0974239   | 0.72004633 | -5.6905004 | 1.27E-08 | 6.08E-08 | Pasteurellaceae     | EasyDNA vs QIAStool      |
| 52.7372451 | -4.7893782   | 0.84104417 | -5.6945621 | 1.24E-08 | 6.56E-08 | Rikenellaceae       | EasyDNA vs InnuPURE      |
| 680.114734 | -4.5127186   | 0.79165921 | -5.7003298 | 1.20E-08 | 8.67E-08 | Pasteurellaceae     | EasyDNA vs MagNAPure     |
| 55.8474481 | 4.94136357   | 0.85181641 | 5.80097251 | 6.59E-09 | 9.01E-08 | Lactobacillaceae    | FastDNA vs MagNAPure     |
| 195.592384 | 4.63413921   | 0.81137436 | 5.71146864 | 1.12E-08 | 1.15E-07 | Coriobacteriaceae   | FastDNA vs MagNAPure     |
| 118.367167 | 3.5108296    | 0.62265509 | 5.6384821  | 1.72E-08 | 1.58E-07 | Streptococcaceae    | EasyDNA vs PowerSoil.HMP |
| 129.697728 | -2.7013853   | 0.46425926 | -5.8187    | 5.93E-09 | 1.90E-07 | Erysipelotrichaceae | QIAStool vs QIAStool+BB  |
| 261.894528 | 3.6491912    | 0.65484847 | 5.57257343 | 2.51E-08 | 2.26E-07 | [Mogibacteriaceae]  | FastDNA vs QIAStool      |
| 3052.94009 | -4.6400461   | 0.84608129 | -5.4841611 | 4.15E-08 | 3.19E-07 | Bacteroidaceae      | EasyDNA vs PowerSoil.HMP |
| 14192.9873 | 3.01986302   | 0.55817717 | 5.4102231  | 6.29E-08 | 5.04E-07 | Ruminococcaceae     | EasyDNA vs QIAStool+BB   |
| 12.8572515 | 4.68299174   | 0.87546116 | 5.34917137 | 8.84E-08 | 6.36E-07 | Turicibacteraceae   | FastDNA vs QIAStool      |
| 129.697728 | 2.47103163   | 0.46631338 | 5.29907944 | 1.16E-07 | 6.98E-07 | Erysipelotrichaceae | FastDNA vs QIAStool      |
| 14192.9873 | 2.93847088   | 0.55833808 | 5.26288821 | 1.42E-07 | 9.14E-07 | Ruminococcaceae     | EasyDNA vs MagNAPure     |
| 14192.9873 | 2.89591167   | 0.55820633 | 5.18788757 | 2.13E-07 | 1.02E-06 | Ruminococcaceae     | EasyDNA vs InnuPURE      |
| 8087.80815 | 3.53845009   | 0.6544545  | 5.40671674 | 6.42E-08 | 1.06E-06 | Bifidobacteriaceae  | EasyDNA vs FastDNA       |
| 750.272969 | -3.3818974   | 0.62676068 | -5.3958354 | 6.82E-08 | 1.06E-06 | Porphyromonadaceae  | EasyDNA vs FastDNA       |
| 12.0964552 | 5.12847194   | 0.99982132 | 5.12938846 | 2.91E-07 | 1.28E-06 | Actinomycetaceae    | EasyDNA vs InnuPURE      |
| 188.732855 | -4.5189874   | 0.86857022 | -5.2027888 | 1.96E-07 | 1.29E-06 | [Barnesiellaceae]   | EasyDNA vs PowerSoil.HMP |



bioRxiv preprint doi: <https://doi.org/10.1101/064394>; this version posted July 18, 2016. The copyright holder for this preprint (which was not certified by peer review) is the author/funder, who has granted bioRxiv a license to display the preprint in perpetuity. It is made available under aCC-BY 4.0 International license.

|            |            |            |            |            |            |                      |                          |
|------------|------------|------------|------------|------------|------------|----------------------|--------------------------|
| 128.300954 | -3.9366676 | 0.7636346  | -5.1551718 | 2.53E-07   | 1.47E-06   | [Paraprevotellaceae] | EasyDNA vs MagNAPure     |
| 52.7372451 | -4.3339548 | 0.84802512 | -5.1106443 | 3.21E-07   | 1.69E-06   | Rikenellaceae        | EasyDNA vs MagNAPure     |
| 8087.80815 | 4.6840799  | 0.86240099 | 5.43144078 | 5.59E-08   | 1.87E-06   | Bifidobacteriaceae   | FastDNA vs PowerSoil.HMP |
| 195.592384 | 5.52581549 | 1.03014075 | 5.36413637 | 8.13E-08   | 1.87E-06   | Coriobacteriaceae    | FastDNA vs PowerSoil.HMP |
| 18839.0105 | -4.1923769 | 0.82982709 | -5.052109  | 4.37E-07   | 1.91E-06   | Prevotellaceae       | EasyDNA vs QIAstool      |
| 833.096381 | -4.9687451 | 0.98221289 | -5.0587252 | 4.22E-07   | 2.04E-06   | Alcaligenaceae       | EasyDNA vs MagNAPure     |
| 3052.94009 | -3.5171962 | 0.69110702 | -5.0892208 | 3.60E-07   | 2.21E-06   | Bacteroidaceae       | EasyDNA vs QIAstool+BB   |
| 188.732855 | -3.7434477 | 0.73628464 | -5.0842398 | 3.69E-07   | 2.21E-06   | [Barnesiellaceae]    | EasyDNA vs QIAstool+BB   |
| 12.0964552 | 4.43642641 | 0.88398443 | 5.0186703  | 5.20E-07   | 2.77E-06   | Actinomycetaceae     | EasyDNA vs QIAstool+BB   |
| 717.960343 | 2.58858006 | 0.5178777  | 4.99843893 | 5.78E-07   | 2.77E-06   | Verrucomicrobiaceae  | EasyDNA vs QIAstool+BB   |
| 55.8474481 | 3.13191814 | 0.62594371 | 5.00351402 | 5.63E-07   | 2.90E-06   | Lactobacillaceae     | FastDNA vs QIAstool      |
| 14192.9873 | 2.87901713 | 0.55820744 | 5.15761149 | 2.50E-07   | 3.10E-06   | Ruminococcaceae      | EasyDNA vs FastDNA       |
| 118.367167 | 2.38319975 | 0.48150613 | 4.94946913 | 7.44E-07   | 3.32E-06   | Streptococcaceae     | EasyDNA vs MagNAPure     |
| 129.697728 | 2.12324888 | 0.43267331 | 4.90727959 | 9.23E-07   | 3.69E-06   | Erysipelotrichaceae  | EasyDNA vs QIAstool      |
| 55.8474481 | 4.67527328 | 0.85115964 | 5.49282774 | 3.96E-08   | 3.80E-06   | Lactobacillaceae     | QIAstool+BB vs MagNAPure |
| 118.367167 | 2.38330929 | 0.46888891 | 5.08288693 | 3.72E-07   | 3.84E-06   | Streptococcaceae     | EasyDNA vs FastDNA       |
| 128.300954 | -3.3578675 | 0.69956976 | -4.7999038 | 1.59E-06   | 5.86E-06   | [Paraprevotellaceae] | EasyDNA vs QIAstool      |
| 52.7372451 | -3.7686587 | 0.79504946 | -4.7401563 | 2.14E-06   | 7.32E-06   | Rikenellaceae        | EasyDNA vs QIAstool      |
| 18839.0105 | -4.359738  | 0.91400032 | -4.7699524 | 1.84E-06   | 7.63E-06   | Prevotellaceae       | EasyDNA vs MagNAPure     |
| 3174.43554 | -2.7465167 | 0.55002666 | -4.9934247 | 5.93E-07   | 9.10E-06   | Veillonellaceae      | FastDNA vs PowerSoil.HMP |
| 128.300954 | -3.603787  | 0.76190786 | -4.7299512 | 2.25E-06   | 9.16E-06   | [Paraprevotellaceae] | EasyDNA vs InnuPURE      |
| 195.592384 | 3.86327715 | 0.72509531 | 5.32795768 | 9.93E-08   | 9.54E-06   | Coriobacteriaceae    | FastDNA vs QIAstool+BB   |
| 50.0848862 | -4.1453968 | 0.88843557 | -4.665951  | 3.07E-06   | 9.83E-06   | [Odoribacteraceae]   | EasyDNA vs QIAstool+BB   |
| 50.0848862 | -4.7429127 | 1.00547833 | -4.717071  | 2.39E-06   | 1.38E-05   | [Odoribacteraceae]   | EasyDNA vs PowerSoil.HMP |
| 50.0848862 | -4.157899  | 0.9175784  | -4.5313829 | 5.86E-06   | 2.56E-05   | [Odoribacteraceae]   | EasyDNA vs QIAstool+BB   |
| 129.697728 | 2.38013376 | 0.4664827  | 5.10229799 | 3.36E-07   | 3.22E-05   | Erysipelotrichaceae  | InnuPURE vs QIAstool     |
| 680.114734 | -4.3059154 | 0.95466001 | -4.5104173 | 6.47E-06   | 3.31E-05   | Pasteurellaceae      | EasyDNA vs PowerSoil.HMP |
| 833.096381 | -3.9165388 | 0.89595272 | -4.3713677 | 1.23E-05   | 3.70E-05   | Alcaligenaceae       | EasyDNA vs QIAstool      |
| 833.096381 | -4.2614855 | 0.98211348 | -4.3390969 | 1.43E-05   | 5.42E-05   | Alcaligenaceae       | EasyDNA vs InnuPURE      |
| 188.732855 | -3.231528  | 0.73880545 | -4.3739905 | 1.22E-05   | 0.00010307 | [Barnesiellaceae]    | EasyDNA vs FastDNA       |
| 12.0964552 | 3.88737674 | 0.89260058 | 4.35511339 | 1.33E-05   | 0.00010307 | Actinomycetaceae     | EasyDNA vs FastDNA       |
| 55.8474481 | -2.8658279 | 0.62501984 | -4.585179  | 4.54E-06   | 0.00010886 | Lactobacillaceae     | QIAstool vs QIAstool+BB  |
| 680.114734 | -3.3086423 | 0.79130163 | -4.1812656 | 2.90E-05   | 0.00011596 | Pasteurellaceae      | EasyDNA vs QIAstool+BB   |
| 24.9775852 | -3.3034167 | 0.79477138 | -4.1564363 | 3.23E-05   | 0.00012499 | S24-7                | EasyDNA vs MagNAPure     |
| 164.683395 | 2.16861441 | 0.52508211 | 4.13004815 | 3.63E-05   | 0.00016321 | Clostridiaceae       | FastDNA vs QIAstool      |
| 3174.43554 | 1.83931522 | 0.41386092 | 4.44428346 | 8.82E-06   | 0.00016932 | Veillonellaceae      | QIAstool vs QIAstool+BB  |
| 52.7372451 | -3.9821991 | 0.96797847 | -4.1139335 | 3.89E-05   | 0.00017893 | Rikenellaceae        | EasyDNA vs PowerSoil.HMP |
| 3174.43554 | -1.9851163 | 0.45364194 | -4.3759541 | 1.21E-05   | 0.00018135 | Veillonellaceae      | FastDNA vs InnuPURE      |
| 50.0848862 | -3.8686456 | 0.92385007 | -4.1875253 | 2.82E-05   | 0.00019428 | [Odoribacteraceae]   | EasyDNA vs FastDNA       |
| 12.8572515 | 4.81248863 | 1.14323741 | 4.20952688 | 2.56E-05   | 0.00020984 | Turicibacteraceae    | FastDNA vs MagNAPure     |
| 52.7372451 | -3.2306201 | 0.84373606 | -3.8289464 | 0.00012869 | 0.00047517 | Rikenellaceae        | EasyDNA vs QIAstool+BB   |
| 12.8572515 | 3.82479629 | 0.94129838 | 4.06331974 | 4.84E-05   | 0.00054427 | Turicibacteraceae    | FastDNA vs InnuPURE      |
| 2.90835369 | 5.801207   | 1.54291246 | 3.75990677 | 0.00016998 | 0.00058278 | Flavobacteriaceae    | EasyDNA vs QIAstool+BB   |
| 24.9775852 | -2.6872704 | 0.73960427 | -3.6333895 | 0.00027972 | 0.0007898  | S24-7                | EasyDNA vs QIAstool      |
| 20.5947041 | -2.5767744 | 0.70109054 | -3.6753803 | 0.0002375  | 0.00086092 | Desulfovibrionaceae  | EasyDNA vs MagNAPure     |
| 118.367167 | 1.7660869  | 0.47972483 | 3.68145821 | 0.0002319  | 0.00092762 | Streptococcaceae     | FastDNA vs QIAstool      |
| 20.5947041 | -2.2850151 | 0.64393127 | -3.5485389 | 0.00038737 | 0.001033   | Desulfovibrionaceae  | EasyDNA vs QIAstool      |
| 8087.80815 | 3.05449188 | 0.72131966 | 4.2345884  | 2.29E-05   | 0.00109906 | Bifidobacteriaceae   | QIAstool+BB vs MagNAPure |
| 717.960343 | 2.05393444 | 0.51665248 | 3.97546612 | 7.02E-05   | 0.00112386 | Verrucomicrobiaceae  | QIAstool vs QIAstool+BB  |
| 717.960343 | 2.34984392 | 0.64833575 | 3.62442444 | 0.00028961 | 0.00121108 | Verrucomicrobiaceae  | EasyDNA vs PowerSoil.HMP |
| 55.8474481 | 3.38899548 | 0.87536361 | 3.87152888 | 0.00010815 | 0.00124378 | Lactobacillaceae     | FastDNA vs PowerSoil.HMP |
| 14192.9873 | 2.47838617 | 0.69245926 | 3.57910753 | 0.00034477 | 0.00132162 | Ruminococcaceae      | EasyDNA vs PowerSoil.HMP |
| 833.096381 | -4.1016476 | 1.16606691 | -3.5175062 | 0.00043562 | 0.00154143 | Alcaligenaceae       | EasyDNA vs PowerSoil.HMP |
| 3052.94009 | -2.5171693 | 0.6913973  | -3.6406987 | 0.0002719  | 0.00156067 | Bacteroidaceae       | EasyDNA vs FastDNA       |
| 55.8474481 | -2.3828644 | 0.6553515  | -3.6360097 | 0.00027689 | 0.00156067 | Lactobacillaceae     | EasyDNA vs FastDNA       |
| 2.90835369 | 5.46873449 | 1.5682075  | 3.48725183 | 0.00048801 | 0.00169597 | Flavobacteriaceae    | EasyDNA vs InnuPURE      |
| 24.9775852 | -2.7362663 | 0.78754989 | -3.4744037 | 0.00051199 | 0.00169597 | S24-7                | EasyDNA vs InnuPURE      |
| 833.096381 | -3.3916737 | 0.98214712 | -3.4533255 | 0.00055372 | 0.00177191 | Alcaligenaceae       | EasyDNA vs QIAstool+BB   |
| 50.0848862 | -2.1811191 | 0.60399625 | -3.6111467 | 0.00030485 | 0.00196263 | [Odoribacteraceae]   | FastDNA vs MagNAPure     |
| 164.683395 | 2.091138   | 0.58305007 | 3.5865496  | 0.00033508 | 0.00196263 | Clostridiaceae       | FastDNA vs MagNAPure     |
| 164.683395 | -1.8905223 | 0.53660316 | -3.5231293 | 0.00042648 | 0.0022035  | Clostridiaceae       | EasyDNA vs FastDNA       |
| 1.64901163 | 5.58253937 | 1.67724193 | 3.32840438 | 0.00087345 | 0.00220661 | Corynebacteriaceae   | EasyDNA vs QIAstool      |
| 680.114734 | -2.7600494 | 0.79209328 | -3.4845004 | 0.00049306 | 0.0023515  | Pasteurellaceae      | EasyDNA vs FastDNA       |
| 18839.0105 | -3.0749852 | 0.91400099 | -3.3643128 | 0.00076735 | 0.00239231 | Prevotellaceae       | EasyDNA vs InnuPURE      |
| 8087.80815 | -3.0141428 | 0.71644091 | -4.2071059 | 2.59E-05   | 0.00248315 | Bifidobacteriaceae   | InnuPURE vs QIAstool+BB  |

bioRxiv preprint doi: <https://doi.org/10.1101/064394>; this version posted July 18, 2016. The copyright holder for this preprint (which was not certified by peer review) is the author/funder, who has granted bioRxiv a license to display the preprint in perpetuity. It is made available under aCC-BY 4.0 International license.

|            |            |            |            |            |            |                       |                              |
|------------|------------|------------|------------|------------|------------|-----------------------|------------------------------|
| 11.6781466 | 2.99916116 | 0.92454824 | 3.2439207  | 0.00117897 | 0.00282952 | Staphylococcaceae     | EasyDNA vs QIAStool          |
| 52.7372451 | -2.5787944 | 0.72537335 | -3.555127  | 0.0003778  | 0.00340017 | Rikenellaceae         | FastDNA vs InnuPURE          |
| 717.960343 | 2.18530557 | 0.56391756 | 3.87522171 | 0.00010653 | 0.00350549 | Verrucomicrobiaceae   | FastDNA vs QIAStool+BB       |
| 12.8572515 | 3.50252691 | 0.90541725 | 3.86841197 | 0.00010955 | 0.00350549 | Turicibacteraceae     | FastDNA vs QIAStool+BB       |
| 55.8474481 | -2.1167741 | 0.65447232 | -3.2343219 | 0.00121932 | 0.00365796 | Lactobacillaceae      | EasyDNA vs QIAStool+BB       |
| 128.300954 | -2.9732328 | 0.91355445 | -3.2545765 | 0.00113562 | 0.00373131 | [Paraprevotellaceae]  | EasyDNA vs PowerSoil.HMP     |
| 12.0964552 | 3.6784619  | 1.13856961 | 3.23077471 | 0.00123455 | 0.00378596 | Actinomycetaceae      | EasyDNA vs PowerSoil.HMP     |
| 33.4361572 | 2.81733334 | 0.86547361 | 3.25525042 | 0.00113292 | 0.00386527 | Enterobacteriaceae    | EasyDNA vs MagNAPure         |
| 1.82114912 | 5.23886708 | 1.65581045 | 3.16392923 | 0.00155655 | 0.00402037 | Sphingobacteriaceae   | EasyDNA vs QIAStool+BB       |
| 128.300954 | -2.4114715 | 0.76277926 | -3.1614277 | 0.00156998 | 0.00402037 | [Paraprevotellaceae]  | EasyDNA vs QIAStool+BB       |
| 33.4361572 | 2.54187917 | 0.80503432 | 3.15747925 | 0.0015914  | 0.00402037 | Enterobacteriaceae    | EasyDNA vs QIAStool+BB       |
| 3174.43554 | -1.7292853 | 0.45259586 | -3.8208156 | 0.00013301 | 0.00425635 | Veillonellaceae       | QIAStool+BB vs MagNAPure     |
| 12.0964552 | 2.92089424 | 0.9106931  | 3.20733102 | 0.00133973 | 0.0043169  | Actinomycetaceae      | EasyDNA vs MagNAPure         |
| 261.894528 | 2.6444657  | 0.67913295 | 3.89388516 | 9.87E-05   | 0.00473527 | [Mogibacteriaceae]    | InnuPURE vs QIAStool         |
| 18839.0105 | -3.4408077 | 1.0966717  | -3.1375002 | 0.00170395 | 0.00479902 | Prevotellaceae        | EasyDNA vs PowerSoil.HMP     |
| 2.73031934 | -5.5948167 | 1.78991433 | -3.1257455 | 0.00177355 | 0.00479902 | Aerococcaceae         | EasyDNA vs PowerSoil.HMP     |
| 55.8474481 | 3.46324375 | 0.85610471 | 4.04535067 | 5.22E-05   | 0.00501551 | Lactobacillaceae      | InnuPURE vs MagNAPure        |
| 717.960343 | -2.0716363 | 0.56501412 | -3.6665213 | 0.00024587 | 0.00590094 | Verrucomicrobiaceae   | QIAStool+BB vs MagNAPure     |
| 18839.0105 | -2.7588902 | 0.91399679 | -3.01849   | 0.00254038 | 0.00609691 | Prevotellaceae        | EasyDNA vs QIAStool+BB       |
| 3.42322903 | 4.0050664  | 1.33425048 | 3.00173503 | 0.00268446 | 0.0061359  | Pseudomonadaceae      | EasyDNA vs QIAStool+BB       |
| 750.272969 | -2.1281593 | 0.63659993 | -3.343009  | 0.00082875 | 0.00621564 | Porphyromonadaceae    | FastDNA vs InnuPURE          |
| 50.0848862 | -1.9626447 | 0.59872204 | -3.2780565 | 0.00104524 | 0.00671943 | [Odoribacteriaceae]   | FastDNA vs InnuPURE          |
| 55.8474481 | 2.55849915 | 0.84174411 | 3.03952131 | 0.00236954 | 0.00723335 | Lactobacillaceae      | EasyDNA vs MagNAPure         |
| 3052.94009 | -2.3734471 | 0.74564072 | -3.1830975 | 0.00145709 | 0.00779712 | Bacteroidaceae        | FastDNA vs InnuPURE          |
| 680.114734 | -2.6383223 | 0.83401698 | -3.1633915 | 0.00155942 | 0.00779712 | Pasteurellaceae       | FastDNA vs InnuPURE          |
| 261.894528 | 3.13867473 | 0.8067979  | 3.89028617 | 0.00010013 | 0.00795635 | [Mogibacteriaceae]    | PowerSoil.HMP vs QIAStool    |
| 129.697728 | 2.20203213 | 0.58468421 | 3.76619048 | 0.00016576 | 0.00795635 | Erysipelotrichaceae   | PowerSoil.HMP vs QIAStool    |
| 2.73031934 | -5.9403078 | 1.78353589 | -3.3306354 | 0.00086648 | 0.00797162 | Aerococcaceae         | FastDNA vs PowerSoil.HMP     |
| 750.272969 | -2.0086063 | 0.63715947 | -3.1524389 | 0.00161913 | 0.00829803 | Porphyromonadaceae    | FastDNA vs MagNAPure         |
| 12.8572515 | 2.52115646 | 0.87157181 | 2.89265487 | 0.00382001 | 0.00873145 | Turicibacteraceae     | EasyDNA vs QIAStool          |
| 12.8249831 | 2.47583548 | 0.80177935 | 3.08792622 | 0.00201559 | 0.00907013 | Peptostreptococcaceae | FastDNA vs InnuPURE          |
| 12.8572515 | 3.81865729 | 1.18165368 | 3.23162137 | 0.0012309  | 0.0094369  | Turicibacteraceae     | FastDNA vs PowerSoil.HMP     |
| 24.9775852 | -2.6351797 | 0.91756811 | -2.8719173 | 0.0040799  | 0.0104264  | S24-7                 | EasyDNA vs PowerSoil.HMP     |
| 3052.94009 | -2.2637531 | 0.74575245 | -3.0355288 | 0.00240114 | 0.01086238 | Bacteroidaceae        | FastDNA vs MagNAPure         |
| 188.732855 | -2.1015916 | 0.6991929  | -3.0057393 | 0.00264936 | 0.01086238 | [Barnesiellaceae]     | FastDNA vs MagNAPure         |
| 128.300954 | -2.2809055 | 0.7707057  | -2.9595026 | 0.00308136 | 0.01148507 | [Paraprevotellaceae]  | FastDNA vs MagNAPure         |
| 717.960343 | 2.05912098 | 0.56396613 | 3.65114298 | 0.00026108 | 0.01253164 | Verrucomicrobiaceae   | InnuPURE vs QIAStool+BB      |
| 52.7372451 | -2.1233709 | 0.7336022  | -2.8944446 | 0.0037983  | 0.01297752 | Rikenellaceae         | FastDNA vs MagNAPure         |
| 2.90835369 | 4.49112126 | 1.61342038 | 2.78360267 | 0.00537588 | 0.0130153  | Flavobacteriaceae     | EasyDNA vs PowerSoil.HMP     |
| 3174.43554 | 1.11548884 | 0.41450174 | 2.69115597 | 0.00712049 | 0.01529563 | Veillonellaceae       | EasyDNA vs QIAStool+BB       |
| 11.6781466 | 2.68984272 | 1.00310889 | 2.6815062  | 0.00732916 | 0.01529563 | Staphylococcaceae     | EasyDNA vs QIAStool+BB       |
| 129.697728 | -1.7885614 | 0.47769996 | -3.7441104 | 0.00018103 | 0.01536327 | Erysipelotrichaceae   | QIAStool vs MagNAPure        |
| 118.367167 | -1.7661964 | 0.4920531  | -3.5894428 | 0.00033139 | 0.01536327 | Streptococcaceae      | QIAStool vs MagNAPure        |
| 50.0848862 | -1.9043678 | 0.54541108 | -3.4916192 | 0.0004801  | 0.01536327 | [Odoribacteriaceae]   | QIAStool vs MagNAPure        |
| 12.8249831 | -2.3955975 | 0.82460766 | -2.9051361 | 0.00367093 | 0.01625699 | Peptostreptococcaceae | EasyDNA vs FastDNA           |
| 833.096381 | -2.9212505 | 1.04951845 | -2.7834198 | 0.00537892 | 0.01696427 | Alcaligenaceae        | FastDNA vs MagNAPure         |
| 8087.80815 | -3.173788  | 0.86249486 | -3.6797762 | 0.00023344 | 0.01712544 | Bifidobacteriaceae    | PowerSoil.HMP vs QIAStool+BB |
| 55.8474481 | -3.1229052 | 0.87472716 | -3.5701477 | 0.00035678 | 0.01712544 | Lactobacillaceae      | PowerSoil.HMP vs QIAStool+BB |
| 11.6781466 | 2.79196033 | 1.02507165 | 2.72367334 | 0.00645603 | 0.01900943 | Staphylococcaceae     | EasyDNA vs InnuPURE          |
| 24.9775852 | -2.0060866 | 0.78814538 | -2.5453256 | 0.01091759 | 0.02183518 | S24-7                 | EasyDNA vs QIAStool+BB       |
| 3.42322903 | -4.3875174 | 1.50304307 | -2.9190896 | 0.00351055 | 0.02298506 | Pseudomonadaceae      | FastDNA vs PowerSoil.HMP     |
| 164.683395 | 1.99810261 | 0.70063696 | 2.85183728 | 0.00434673 | 0.02298506 | Clostridiaceae        | FastDNA vs PowerSoil.HMP     |
| 717.960343 | 1.94656943 | 0.68516789 | 2.84101089 | 0.00449708 | 0.02298506 | Verrucomicrobiaceae   | FastDNA vs PowerSoil.HMP     |
| 1.64901163 | 4.49276703 | 1.71286008 | 2.62296208 | 0.0087169  | 0.025279   | Corynebacteriaceae    | EasyDNA vs MagNAPure         |
| 1.82114912 | 4.39593515 | 1.68839485 | 2.60361796 | 0.00922455 | 0.02547733 | Sphingobacteriaceae   | EasyDNA vs MagNAPure         |
| 24.9775852 | -1.8300403 | 0.6984518  | -2.6201383 | 0.00878941 | 0.02574042 | S24-7                 | FastDNA vs MagNAPure         |
| 50.0848862 | -1.8918656 | 0.59388004 | -3.1856023 | 0.00144453 | 0.02773498 | [Odoribacteriaceae]   | QIAStool+BB vs MagNAPure     |
| 1.64901163 | 4.22462547 | 1.68481228 | 2.50747548 | 0.0121597  | 0.02796731 | Corynebacteriaceae    | EasyDNA vs PowerSoil.HMP     |
| 1.82114912 | 4.10868763 | 1.67143497 | 2.45817976 | 0.01396433 | 0.03058852 | Sphingobacteriaceae   | EasyDNA vs PowerSoil.HMP     |
| 195.592384 | 1.736134   | 0.65109372 | 2.66648864 | 0.00766482 | 0.03168125 | Coriobacteriaceae     | EasyDNA vs FastDNA           |
| 3.42322903 | 4.86140167 | 1.48339223 | 3.27721931 | 0.00104835 | 0.03354717 | Pseudomonadaceae      | PowerSoil.HMP vs QIAStool+BB |
| 3.42322903 | 3.53118218 | 1.35773544 | 2.6007881  | 0.00930099 | 0.03403901 | Pseudomonadaceae      | EasyDNA vs FastDNA           |
| 18839.0105 | -2.3758961 | 0.91401379 | -2.5994094 | 0.00933843 | 0.03403901 | Prevotellaceae        | EasyDNA vs FastDNA           |
| 52.7372451 | -2.2105839 | 0.85684169 | -2.579921  | 0.00988229 | 0.03403901 | Rikenellaceae         | EasyDNA vs FastDNA           |
| 750.272969 | -1.5057613 | 0.58394147 | -2.5786168 | 0.00991968 | 0.03571084 | Porphyromonadaceae    | FastDNA vs QIAStool          |

bioRxiv preprint doi: <https://doi.org/10.1101/064394>; this version posted July 18, 2016. The copyright holder for this preprint (which was not certified by peer review) is the author/funder, who has granted bioRxiv a license to display the preprint in perpetuity. It is made available under aCC-BY 4.0 International license.

|            |            |            |            |            |            |                      |                           |
|------------|------------|------------|------------|------------|------------|----------------------|---------------------------|
| 33.4361572 | 2.28011708 | 0.9191566  | 2.48066226 | 0.01511388 | 0.05584454 | Enterobacteriaceae   | FastDNA vs MagNAPure      |
| 12.8572515 | -2.1618353 | 0.86641893 | -2.4951386 | 0.0125908  | 0.04108575 | Turicibacteraceae    | EasyDNA vs FastDNA        |
| 20.5947041 | -1.6911916 | 0.69469488 | -2.434438  | 0.01491493 | 0.04160481 | Desulfovibrionaceae  | EasyDNA vs InnuPURE       |
| 3052.94009 | -1.7009654 | 0.68492375 | -2.4834376 | 0.01301211 | 0.0425851  | Bacteroidaceae       | FastDNA vs QIAStool       |
| 3.96627812 | 2.57800025 | 1.13190334 | 2.27757986 | 0.02275162 | 0.04368311 | Comamonadaceae       | EasyDNA vs QIAStool+BB    |
| 128.300954 | -1.9480249 | 0.76899668 | -2.5332033 | 0.01130254 | 0.04623766 | [Paraprevotellaceae] | FastDNA vs InnuPURE       |
| 33.4361572 | 1.66163853 | 0.72289861 | 2.29857756 | 0.02152894 | 0.04635089 | Enterobacteriaceae   | EasyDNA vs QIAStool       |
| 1.29933147 | 3.68974709 | 1.61352576 | 2.28676057 | 0.0222098  | 0.04635089 | Xanthomonadaceae     | EasyDNA vs QIAStool       |
| 33.4361572 | 1.91151815 | 0.80544298 | 2.37325075 | 0.01763229 | 0.04672557 | Enterobacteriaceae   | EasyDNA vs InnuPURE       |
| 128.300954 | -1.7021055 | 0.70735254 | -2.4063043 | 0.01611483 | 0.0483445  | [Paraprevotellaceae] | FastDNA vs QIAStool       |
| 3174.43554 | -1.3981164 | 0.45362294 | -3.0821114 | 0.00205538 | 0.0493291  | Veillonellaceae      | FastDNA vs QIAStool+BB    |
| 12.8572515 | 2.65065335 | 1.14044478 | 2.32422771 | 0.02011329 | 0.05302595 | Turicibacteraceae    | EasyDNA vs MagNAPure      |
| 52.7372451 | -1.5580748 | 0.67048579 | -2.3238    | 0.02013622 | 0.05576183 | Rikenellaceae        | FastDNA vs QIAStool       |
| 50.0848862 | 1.68589343 | 0.53952737 | 3.1247598  | 0.0017795  | 0.0569441  | [Odoribacteraceae]   | InnuPURE vs QIAStool      |
| 20.5947041 | -1.4101301 | 0.61823455 | -2.2808982 | 0.02255447 | 0.05779583 | Desulfovibrionaceae  | FastDNA vs MagNAPure      |
| 3174.43554 | -1.2523153 | 0.41388181 | -3.02578   | 0.00247993 | 0.05951824 | Veillonellaceae      | InnuPURE vs QIAStool      |
| 0.882185   | 4.0371131  | 1.78622755 | 2.26013371 | 0.02381295 | 0.06009936 | Gemellaceae          | EasyDNA vs InnuPURE       |
| 2.90835369 | 2.46128406 | 1.15648797 | 2.12824009 | 0.03331718 | 0.06663437 | Flavobacteriaceae    | EasyDNA vs QIAStool       |
| 14192.9873 | 1.24151496 | 0.55827928 | 2.2238242  | 0.02616027 | 0.06726928 | Ruminococcaceae      | FastDNA vs QIAStool       |
| 12.0964552 | -3.2773268 | 1.09799283 | -2.9848344 | 0.00283732 | 0.06809565 | Actinomycetaceae     | QIAStool vs MagNAPure     |
| 1.64901163 | 3.77525052 | 1.6511205  | 2.2864779  | 0.02222632 | 0.06890158 | Corynebacteriaceae   | EasyDNA vs FastDNA        |
| 1.64901163 | 3.58183657 | 1.63651122 | 2.18870272 | 0.02861845 | 0.06894446 | Corynebacteriaceae   | EasyDNA vs InnuPURE       |
| 164.683395 | 1.34909893 | 0.57279168 | 2.3553047  | 0.01850752 | 0.06940321 | Clostridiaceae       | FastDNA vs InnuPURE       |
| 0.882185   | 4.01816686 | 1.78597331 | 2.24984709 | 0.02445865 | 0.07095808 | Gemellaceae          | EasyDNA vs FastDNA        |
| 1.82114912 | 3.54033456 | 1.58145933 | 2.2386504  | 0.02517867 | 0.07095808 | Sphingobacteriaceae  | EasyDNA vs FastDNA        |
| 2.73031934 | 4.97244546 | 1.63772663 | 3.03618771 | 0.0023959  | 0.07666885 | Aerococcaceae        | PowerSoil.HMP vs QIAStool |
| 1.29933147 | 3.36579674 | 1.65782097 | 2.03025344 | 0.04233078 | 0.07814914 | Xanthomonadaceae     | EasyDNA vs QIAStool+BB    |
| 3052.94009 | -2.1228769 | 0.89019477 | -2.384733  | 0.01709152 | 0.07862099 | Bacteroidaceae       | FastDNA vs PowerSoil.HMP  |
| 261.894528 | 1.477758   | 0.69172546 | 2.136336   | 0.03265204 | 0.07874903 | [Mogibacteriaceae]   | FastDNA vs MagNAPure      |
| 12.0964552 | 2.31084429 | 1.08368228 | 2.13240017 | 0.03297396 | 0.07913751 | Actinomycetaceae     | FastDNA vs QIAStool       |
| 680.114734 | -1.7526692 | 0.83469225 | -2.099779  | 0.03574829 | 0.08142665 | Pasteurellaceae      | FastDNA vs MagNAPure      |
| 128.300954 | -1.6557621 | 0.76773858 | -2.1566743 | 0.03103105 | 0.08364892 | [Paraprevotellaceae] | EasyDNA vs FastDNA        |
| 11.6015749 | -2.2504463 | 1.0243547  | -2.1969405 | 0.0280247  | 0.09112658 | Campylobacteraceae   | FastDNA vs InnuPURE       |
| 55.8474481 | 1.47811982 | 0.67420109 | 2.19240201 | 0.02835049 | 0.09112658 | Lactobacillaceae     | FastDNA vs InnuPURE       |
| 0.882185   | 3.39994624 | 1.70295575 | 1.99649711 | 0.04587984 | 0.09593057 | Gemellaceae          | EasyDNA vs PowerSoil.HMP  |
| 20.5947041 | -1.1183708 | 0.55185161 | -2.0265789 | 0.04270549 | 0.09608736 | Desulfovibrionaceae  | FastDNA vs QIAStool       |
| 833.096381 | -2.0474946 | 0.98295866 | -2.0829916 | 0.03725199 | 0.09623431 | Alcaligenaceae       | EasyDNA vs FastDNA        |
| 1.19877439 | 3.49866232 | 1.81740826 | 1.92508331 | 0.05421894 | 0.09638922 | Cryomorphaceae       | EasyDNA vs QIAStool+BB    |
| 1.82114912 | 3.1528737  | 1.55024005 | 2.0337971  | 0.04197206 | 0.09671822 | Sphingobacteriaceae  | EasyDNA vs InnuPURE       |
| 18839.0105 | -1.9838419 | 0.98946509 | -2.004964  | 0.04496689 | 0.09703382 | Prevotellaceae       | FastDNA vs MagNAPure      |
| 2.73031934 | -3.6259805 | 1.69469176 | -2.1396106 | 0.03238625 | 0.09715874 | Aerococcaceae        | FastDNA vs InnuPURE       |
| 2.90835369 | 2.67380324 | 1.29756082 | 2.06063809 | 0.03933758 | 0.0975572  | Flavobacteriaceae    | EasyDNA vs FastDNA        |
| 11.6781466 | 2.16807721 | 1.05257629 | 2.05978154 | 0.03941943 | 0.0977461  | Staphylococcaceae    | EasyDNA vs MagNAPure      |
| 0.882185   | 3.61138826 | 1.76237664 | 2.04915804 | 0.04044666 | 0.0977461  | Gemellaceae          | EasyDNA vs MagNAPure      |
| 833.096381 | -2.2139909 | 1.04942688 | -2.1097143 | 0.03488297 | 0.09810835 | Alcaligenaceae       | FastDNA vs InnuPURE       |
| 3174.43554 | -0.7238264 | 0.37173907 | -1.9471356 | 0.05151847 | 0.09891547 | Veillonellaceae      | EasyDNA vs QIAStool       |
| 18839.0105 | -1.8164808 | 0.91354221 | -1.9883929 | 0.04676826 | 0.09903866 | Prevotellaceae       | FastDNA vs QIAStool       |
| 750.272969 | -1.7309025 | 0.76559114 | -2.2608707 | 0.02376727 | 0.09939039 | Porphyromonadaceae   | FastDNA vs PowerSoil.HMP  |
| 188.732855 | -1.2492702 | 0.64121456 | -1.9482873 | 0.0513806  | 0.09998639 | [Barnesiellaceae]    | FastDNA vs QIAStool       |
| 833.096381 | -1.8690442 | 0.97057026 | -1.9257176 | 0.05413965 | 0.09998639 | Alcaligenaceae       | FastDNA vs QIAStool       |
| 24.9775852 | -1.213894  | 0.63403122 | -1.9145651 | 0.05554799 | 0.09998639 | S24-7                | FastDNA vs QIAStool       |

**Table S2B. Difference abundance of families - Pig fecal microbial community**

| baseMean   | log2FoldChai | lfcSE      | stat       | pvalue    | padj      | family                | compare                      |
|------------|--------------|------------|------------|-----------|-----------|-----------------------|------------------------------|
| 6226.33527 | 8.23337231   | 0.2901671  | 28.3745898 | 4.16E-177 | 2.96E-175 | Turicibacteraceae     | FastDNA vs QIAStool          |
| 6226.33527 | -8.9600238   | 0.31794514 | -28.181037 | 9.99E-175 | 7.99E-173 | Turicibacteraceae     | EasyDNA vs FastDNA           |
| 1329.00016 | -7.3100807   | 0.26522532 | -27.561776 | 3.20E-167 | 1.28E-165 | Peptostreptococcaceae | EasyDNA vs FastDNA           |
| 1329.00016 | 6.29759341   | 0.23184427 | 27.1630318 | 1.78E-162 | 6.31E-161 | Peptostreptococcaceae | FastDNA vs QIAStool          |
| 6226.33527 | 9.16361787   | 0.33891741 | 27.0379083 | 5.30E-161 | 3.44E-159 | Turicibacteraceae     | FastDNA vs MagNAPure         |
| 1329.00016 | 6.95674527   | 0.26345927 | 26.4053921 | 1.19E-153 | 6.18E-152 | Peptostreptococcaceae | FastDNA vs InnuPURE          |
| 1329.00016 | 6.24786129   | 0.26803077 | 23.310239  | 3.49E-120 | 1.13E-118 | Peptostreptococcaceae | FastDNA vs MagNAPure         |
| 6226.33527 | 8.37938709   | 0.35930749 | 23.3209362 | 2.72E-120 | 1.88E-118 | Turicibacteraceae     | FastDNA vs PowerSoil.HMP     |
| 14966.648  | -7.3777612   | 0.32913136 | -22.415856 | 2.76E-111 | 7.35E-110 | Clostridiaceae        | EasyDNA vs FastDNA           |
| 6226.33527 | 6.98112067   | 0.31642099 | 22.0627609 | 7.20E-108 | 1.87E-106 | Turicibacteraceae     | FastDNA vs InnuPURE          |
| 1329.00016 | 6.57818334   | 0.30059891 | 21.8835905 | 3.72E-106 | 1.28E-104 | Peptostreptococcaceae | FastDNA vs PowerSoil.HMP     |
| 1329.00016 | 6.11331273   | 0.30715449 | 19.903055  | 3.83E-88  | 2.18E-86  | Peptostreptococcaceae | FastDNA vs QIAStool+BB       |
| 14966.648  | 7.01386817   | 0.36120224 | 19.4181191 | 5.42E-84  | 1.25E-82  | Clostridiaceae        | FastDNA vs PowerSoil.HMP     |
| 14966.648  | 6.69216818   | 0.34940405 | 19.153093  | 9.12E-82  | 1.58E-80  | Clostridiaceae        | FastDNA vs InnuPURE          |
| 14966.648  | 6.16102466   | 0.34985453 | 17.6102467 | 2.06E-69  | 4.45E-68  | Clostridiaceae        | FastDNA vs MagNAPure         |
| 14966.648  | 5.44539513   | 0.318726   | 17.0848791 | 1.92E-65  | 4.55E-64  | Clostridiaceae        | FastDNA vs QIAStool          |
| 6226.33527 | 6.27791748   | 0.38345515 | 16.3719732 | 3.03E-60  | 8.64E-59  | Turicibacteraceae     | FastDNA vs QIAStool+BB       |
| 14966.648  | 5.80051888   | 0.42495209 | 13.6498186 | 2.02E-42  | 3.85E-41  | Clostridiaceae        | FastDNA vs QIAStool+BB       |
| 254.614729 | -2.6451948   | 0.27545666 | -9.6029437 | 7.77E-22  | 5.05E-20  | S24-7                 | InnuPURE vs QIAStool         |
| 35.1041071 | 2.34749529   | 0.28446002 | 8.25246117 | 1.55E-16  | 1.18E-14  | Peptococcaceae        | EasyDNA vs QIAStool          |
| 576.775751 | 2.79069511   | 0.38546037 | 7.23990142 | 4.49E-13  | 8.98E-12  | Streptococcaceae      | EasyDNA vs FastDNA           |
| 408.703374 | 3.64804379   | 0.50165879 | 7.27196224 | 3.54E-13  | 3.51E-11  | Lactobacillaceae      | EasyDNA vs MagNAPure         |
| 254.614729 | -1.8657731   | 0.26216238 | -7.1168605 | 1.10E-12  | 4.20E-11  | S24-7                 | EasyDNA vs QIAStool          |
| 6226.33527 | 2.88570039   | 0.40420787 | 7.13914937 | 9.39E-13  | 1.09E-10  | Turicibacteraceae     | QIAStool+BB vs MagNAPure     |
| 576.775751 | 2.21032995   | 0.32171271 | 6.87050862 | 6.40E-12  | 1.62E-10  | Streptococcaceae      | EasyDNA vs QIAStool          |
| 2576.15115 | -2.3625033   | 0.3468527  | -6.8112582 | 9.67E-12  | 1.72E-10  | [Paraprevotellaceae]  | FastDNA vs QIAStool          |
| 6226.33527 | -2.6821064   | 0.38685912 | -6.9330312 | 4.12E-12  | 2.06E-10  | Turicibacteraceae     | EasyDNA vs QIAStool+BB       |
| 576.775751 | 2.51571595   | 0.36417115 | 6.90805937 | 4.91E-12  | 2.43E-10  | Streptococcaceae      | EasyDNA vs MagNAPure         |
| 35.1041071 | 2.71384929   | 0.40707004 | 6.66678715 | 2.61E-11  | 8.63E-10  | Peptococcaceae        | EasyDNA vs MagNAPure         |
| 14966.648  | -1.9323661   | 0.29731783 | -6.4993278 | 8.07E-11  | 1.53E-09  | Clostridiaceae        | EasyDNA vs QIAStool          |
| 576.775751 | -2.5501711   | 0.41120073 | -6.201767  | 5.58E-10  | 7.26E-09  | Streptococcaceae      | FastDNA vs InnuPURE          |
| 6226.33527 | 2.1824972    | 0.34136207 | 6.39349657 | 1.62E-10  | 8.92E-09  | Turicibacteraceae     | InnuPURE vs MagNAPure        |
| 22.9687795 | -4.1589171   | 0.64930852 | -6.4051478 | 1.50E-10  | 9.46E-09  | Helicobacteraceae     | EasyDNA vs InnuPURE          |
| 254.614729 | -1.8689828   | 0.30680193 | -6.0918223 | 1.12E-09  | 1.59E-08  | S24-7                 | FastDNA vs QIAStool          |
| 254.614729 | -1.8826504   | 0.30472804 | -6.1781333 | 6.49E-10  | 1.78E-08  | S24-7                 | InnuPURE vs MagNAPure        |
| 1019.42191 | -2.9556395   | 0.49110705 | -6.0183202 | 1.76E-09  | 1.83E-08  | Campylobacteraceae    | FastDNA vs InnuPURE          |
| 6226.33527 | -1.9789032   | 0.32055255 | -6.1734127 | 6.68E-10  | 2.11E-08  | Turicibacteraceae     | EasyDNA vs InnuPURE          |
| 408.703374 | 3.99766576   | 0.64482803 | 6.19958424 | 5.66E-10  | 3.28E-08  | Lactobacillaceae      | QIAStool+BB vs MagNAPure     |
| 22.9687795 | 3.05927367   | 0.51002005 | 5.99834003 | 1.99E-09  | 6.48E-08  | Helicobacteraceae     | InnuPURE vs QIAStool         |
| 576.775751 | 2.27519194   | 0.39134713 | 5.81374372 | 6.11E-09  | 1.12E-07  | Streptococcaceae      | InnuPURE vs MagNAPure        |
| 62.3051996 | -3.6585641   | 0.613405   | -5.9643533 | 2.46E-09  | 1.87E-07  | Enterobacteriaceae    | EasyDNA vs PowerSoil.HMP     |
| 408.703374 | 2.43422116   | 0.43645264 | 5.57728586 | 2.44E-08  | 3.71E-07  | Lactobacillaceae      | EasyDNA vs QIAStool          |
| 576.775751 | 1.96980595   | 0.35224663 | 5.59212148 | 2.24E-08  | 4.86E-07  | Streptococcaceae      | InnuPURE vs QIAStool         |
| 2576.15115 | -1.9272471   | 0.34922351 | -5.5186637 | 3.42E-08  | 2.22E-06  | [Paraprevotellaceae]  | PowerSoil.HMP vs QIAStool    |
| 216.46708  | 6.27411432   | 1.18075226 | 5.31365855 | 1.07E-07  | 3.22E-06  | Bacteroidaceae        | PowerSoil.HMP vs QIAStool    |
| 62.3051996 | 2.92721007   | 0.55710414 | 5.25433196 | 1.49E-07  | 3.22E-06  | Enterobacteriaceae    | PowerSoil.HMP vs QIAStool    |
| 367.01539  | -2.774783    | 0.54483681 | -5.09287   | 3.53E-07  | 3.63E-06  | Spirochaetaceae       | FastDNA vs QIAStool          |
| 7308.6798  | -1.2094339   | 0.23761089 | -5.0899766 | 3.58E-07  | 3.63E-06  | Prevotellaceae        | FastDNA vs QIAStool          |
| 71.0660634 | -2.1428817   | 0.41434301 | -5.1717579 | 2.32E-07  | 3.77E-06  | Alcaligenaceae        | InnuPURE vs QIAStool         |
| 7308.6798  | 1.22465113   | 0.23872154 | 5.13004044 | 2.90E-07  | 4.63E-06  | Prevotellaceae        | EasyDNA vs FastDNA           |
| 62.3051996 | -3.2981065   | 0.61505214 | -5.3623202 | 8.22E-08  | 4.85E-06  | Enterobacteriaceae    | InnuPURE vs PowerSoil.HMP    |
| 2516.24433 | 1.09546943   | 0.21932759 | 4.99467231 | 5.89E-07  | 5.11E-06  | Ruminococcaceae       | FastDNA vs InnuPURE          |
| 6226.33527 | -1.9554548   | 0.36446037 | -5.3653428 | 8.08E-08  | 5.98E-06  | Turicibacteraceae     | QIAStool vs QIAStool+BB      |
| 35.1041071 | 1.49262726   | 0.29814049 | 5.00645612 | 5.54E-07  | 7.21E-06  | Peptococcaceae        | InnuPURE vs QIAStool         |
| 408.703374 | 2.70224502   | 0.53923011 | 5.01130217 | 5.41E-07  | 7.43E-06  | Lactobacillaceae      | InnuPURE vs MagNAPure        |
| 1019.42191 | -2.2116186   | 0.45182578 | -4.8948483 | 9.84E-07  | 8.73E-06  | Campylobacteraceae    | FastDNA vs QIAStool          |
| 88.4317884 | 3.06001619   | 0.6165416  | 4.96319502 | 6.93E-07  | 9.25E-06  | Coriobacteriaceae     | EasyDNA vs FastDNA           |
| 254.614729 | -1.514942    | 0.30301081 | -4.9996301 | 5.74E-07  | 9.33E-06  | S24-7                 | PowerSoil.HMP vs QIAStool    |
| 62.3051996 | 3.74759308   | 0.72291645 | 5.18399201 | 2.17E-07  | 9.99E-06  | Enterobacteriaceae    | PowerSoil.HMP vs QIAStool+BB |
| 7308.6798  | -1.1800909   | 0.23943127 | -4.928725  | 8.28E-07  | 1.08E-05  | Prevotellaceae        | PowerSoil.HMP vs QIAStool    |
| 35.1041071 | 1.93628224   | 0.38058991 | 5.0875816  | 3.63E-07  | 1.23E-05  | Peptococcaceae        | EasyDNA vs PowerSoil.HMP     |
| 22.9687795 | -3.5480864   | 0.70506262 | -5.0322997 | 4.85E-07  | 1.23E-05  | Helicobacteraceae     | EasyDNA vs PowerSoil.HMP     |
| 2516.24433 | -1.1212344   | 0.22183279 | -5.0544122 | 4.32E-07  | 1.27E-05  | Ruminococcaceae       | InnuPURE vs PowerSoil.HMP    |
| 7308.6798  | 1.19530817   | 0.24053344 | 4.96940538 | 6.72E-07  | 1.28E-05  | Prevotellaceae        | EasyDNA vs PowerSoil.HMP     |
| 6226.33527 | -2.1014696   | 0.42138725 | -4.9870271 | 6.13E-07  | 1.41E-05  | Turicibacteraceae     | PowerSoil.HMP vs QIAStool+BB |
| 14966.648  | -1.568473    | 0.33252325 | -4.7168823 | 2.39E-06  | 2.59E-05  | Clostridiaceae        | PowerSoil.HMP vs QIAStool    |
| 254.614729 | 1.65814449   | 0.33449335 | 4.95718218 | 7.15E-07  | 2.65E-05  | S24-7                 | QIAStool vs QIAStool+BB      |
| 2576.15115 | -1.5902241   | 0.34177933 | -4.6527802 | 3.27E-06  | 3.55E-05  | [Paraprevotellaceae]  | InnuPURE vs QIAStool         |



|            |            |            |            |            |            |                            |                              |
|------------|------------|------------|------------|------------|------------|----------------------------|------------------------------|
| 35.1041071 | 3.04129082 | 0.65712892 | 4.62814943 | 3.09E-06   | 4.22E-05   | Peptococcaceae             | EasyDNA vs FastDNA           |
| 367.01539  | -2.2519712 | 0.48760528 | -4.6184307 | 3.87E-06   | 4.47E-05   | Spirochaetaceae            | EasyDNA vs QIAstool          |
| 42.1528852 | 3.57440506 | 0.77612071 | 4.60547568 | 4.12E-06   | 4.47E-05   | Bifidobacteriaceae         | EasyDNA vs QIAstool          |
| 30.2465249 | 5.96837557 | 1.30932681 | 4.55835437 | 5.16E-06   | 4.79E-05   | Verrucomicrobiaceae        | PowerSoil.HMP vs QIAstool    |
| 71.0660634 | -2.5632064 | 0.56711788 | -4.5197066 | 6.19E-06   | 4.89E-05   | Alcaligenaceae             | FastDNA vs QIAstool          |
| 1019.42191 | -2.3003618 | 0.49644019 | -4.6337139 | 3.59E-06   | 6.20E-05   | Campylobacteraceae         | FastDNA vs PowerSoil.HMP     |
| 216.46708  | 6.67995824 | 1.44979616 | 4.60751549 | 4.08E-06   | 6.25E-05   | Bacteroidaceae             | PowerSoil.HMP vs QIAstool+BB |
| 2516.24433 | -0.98295   | 0.21745846 | -4.5201736 | 6.18E-06   | 6.80E-05   | Ruminococcaceae            | InnuPURE vs MagNAPure        |
| 408.703374 | -2.783843  | 0.59619079 | -4.6693829 | 3.02E-06   | 7.45E-05   | Lactobacillaceae           | QIAstool vs QIAstool+BB      |
| 35.1041071 | 1.85898126 | 0.41668134 | 4.46139786 | 8.14E-06   | 7.46E-05   | Peptococcaceae             | InnuPURE vs MagNAPure        |
| 908.726526 | -1.6630925 | 0.37476149 | -4.4377359 | 9.09E-06   | 8.64E-05   | Veillonellaceae            | EasyDNA vs QIAstool          |
| 408.703374 | 2.48203872 | 0.54739067 | 4.53430954 | 5.78E-06   | 9.39E-05   | Lactobacillaceae           | FastDNA vs MagNAPure         |
| 42.1528852 | 4.04263564 | 0.88466376 | 4.56968603 | 4.88E-06   | 0.00010258 | Bifidobacteriaceae         | EasyDNA vs InnuPURE          |
| 810.892629 | -2.4775883 | 0.57438549 | -4.3134592 | 1.61E-05   | 0.00011411 | Erysipelotrichaceae        | FastDNA vs QIAstool          |
| 576.775751 | 1.69015115 | 0.37888619 | 4.4608413  | 8.16E-06   | 0.00012409 | Streptococcaceae           | EasyDNA vs PowerSoil.HMP     |
| 367.01539  | -2.2701322 | 0.52308917 | -4.339857  | 1.43E-05   | 0.00013239 | Spirochaetaceae            | InnuPURE vs QIAstool         |
| 29.6083625 | 1.69887968 | 0.38157423 | 4.45229143 | 8.50E-06   | 0.00013381 | [Mogibacteriaceae]         | EasyDNA vs InnuPURE          |
| 88.4317884 | -2.803111  | 0.63669121 | -4.4026225 | 1.07E-05   | 0.00013904 | Coriobacteriaceae          | FastDNA vs MagNAPure         |
| 6226.33527 | 1.25225163 | 0.2930255  | 4.27352444 | 1.92E-05   | 0.00015633 | Turicibacteraceae          | InnuPURE vs QIAstool         |
| 23.2927606 | 8.01906524 | 1.88146584 | 4.26213705 | 2.02E-05   | 0.00016452 | Aerococcaceae              | PowerSoil.HMP vs QIAstool    |
| 22.9687795 | 2.448443   | 0.58021396 | 4.21989674 | 2.44E-05   | 0.00017652 | Helicobacteraceae          | PowerSoil.HMP vs QIAstool    |
| 32.5255849 | 5.81457361 | 1.39301324 | 4.17409788 | 2.99E-05   | 0.00019446 | Staphylococcaceae          | PowerSoil.HMP vs QIAstool    |
| 367.01539  | -2.2707797 | 0.54976209 | -4.1304771 | 3.62E-05   | 0.00021392 | Spirochaetaceae            | PowerSoil.HMP vs QIAstool    |
| 71.0660634 | -1.6777577 | 0.39962713 | -4.1983078 | 2.69E-05   | 0.00022709 | Alcaligenaceae             | EasyDNA vs QIAstool          |
| 75.3501469 | -3.3526702 | 0.78701599 | -4.2599773 | 2.04E-05   | 0.0002576  | Mycoplasmataceae           | EasyDNA vs InnuPURE          |
| 22.9687795 | -2.9648076 | 0.67504024 | -4.3920458 | 1.12E-05   | 0.00027792 | Helicobacteraceae          | EasyDNA vs MagNAPure         |
| 17.2832685 | -2.2084726 | 0.53750076 | -4.1087804 | 3.98E-05   | 0.00028727 | Desulfovibrionaceae        | InnuPURE vs QIAstool         |
| 30.2465249 | 6.56938288 | 1.56924588 | 4.18633114 | 2.83E-05   | 0.00032602 | Verrucomicrobiaceae        | PowerSoil.HMP vs QIAstool+BB |
| 15.8153467 | 4.63369833 | 1.14552937 | 4.04502795 | 5.23E-05   | 0.00033768 | Moraxellaceae              | FastDNA vs QIAstool          |
| 7308.6798  | 1.26879368 | 0.29728884 | 4.26788197 | 1.97E-05   | 0.00036507 | Prevotellaceae             | QIAstool vs QIAstool+BB      |
| 32.5255849 | 5.54202541 | 1.38556172 | 3.99984016 | 6.34E-05   | 0.00037503 | Staphylococcaceae          | FastDNA vs QIAstool          |
| 1329.00016 | -1.0124872 | 0.24978175 | -4.0534877 | 5.05E-05   | 0.00038349 | Peptostreptococcaceae      | EasyDNA vs QIAstool          |
| 1019.42191 | 1.93983364 | 0.47935342 | 4.04677127 | 5.19E-05   | 0.00040801 | Campylobacteraceae         | InnuPURE vs MagNAPure        |
| 7308.6798  | 1.28401094 | 0.29817511 | 4.3062311  | 1.66E-05   | 0.00041515 | Prevotellaceae             | EasyDNA vs QIAstool+BB       |
| 576.775751 | -2.0306009 | 0.48938134 | -4.1493222 | 3.33E-05   | 0.00047518 | Streptococcaceae           | FastDNA vs QIAstool+BB       |
| 15.4343002 | 1.53247414 | 0.38535741 | 3.97676056 | 6.99E-05   | 0.00048267 | Corynebacteriaceae         | EasyDNA vs QIAstool          |
| 31.9177507 | -3.2697252 | 0.83566211 | -3.912736  | 9.13E-05   | 0.0004984  | Succinivibrionaceae        | FastDNA vs QIAstool          |
| 5.3314072  | 4.35405821 | 1.11876983 | 3.89182661 | 9.95E-05   | 0.00053892 | [Methanomassiliococcaceae] | PowerSoil.HMP vs QIAstool    |
| 14966.648  | -1.2467731 | 0.31964806 | -3.9004556 | 9.60E-05   | 0.0005811  | Clostridiaceae             | InnuPURE vs QIAstool         |
| 2516.24433 | -0.771523  | 0.19809811 | -3.8946512 | 9.83E-05   | 0.0005811  | Ruminococcaceae            | InnuPURE vs QIAstool         |
| 216.46708  | 5.5853327  | 1.27809173 | 4.37005621 | 1.24E-05   | 0.00064592 | Bacteroidaceae             | PowerSoil.HMP vs MagNAPure   |
| 62.3051996 | 2.61404432 | 0.62207451 | 4.20214024 | 2.64E-05   | 0.00068745 | Enterobacteriaceae         | PowerSoil.HMP vs MagNAPure   |
| 2576.15115 | -1.514051  | 0.37895822 | -3.995298  | 6.46E-05   | 0.00069997 | [Paraprevotellaceae]       | FastDNA vs MagNAPure         |
| 2516.24433 | 0.80433271 | 0.20244058 | 3.97317915 | 7.09E-05   | 0.00074466 | Ruminococcaceae            | EasyDNA vs InnuPURE          |
| 22.9687795 | -2.8972138 | 0.74038877 | -3.913098  | 9.11E-05   | 0.0009112  | Helicobacteraceae          | EasyDNA vs FastDNA           |
| 42.1528852 | 3.64689481 | 0.9520937  | 3.83039483 | 0.00012794 | 0.0009504  | Bifidobacteriaceae         | FastDNA vs InnuPURE          |
| 42.1528852 | 3.17866423 | 0.85340488 | 3.72468483 | 0.00019556 | 0.00099177 | Bifidobacteriaceae         | FastDNA vs QIAstool          |
| 88.4317884 | 1.56076323 | 0.41573031 | 3.75426855 | 0.00017385 | 0.00110104 | Coriobacteriaceae          | EasyDNA vs QIAstool          |
| 88.4317884 | 1.78168807 | 0.46431042 | 3.83727784 | 0.00012441 | 0.00111965 | Coriobacteriaceae          | EasyDNA vs InnuPURE          |
| 35.1041071 | -1.3708732 | 0.34666006 | -3.9545174 | 7.67E-05   | 0.001135   | Peptococcaceae             | QIAstool vs QIAstool+BB      |
| 1019.42191 | -1.6885426 | 0.44454014 | -3.798403  | 0.00014563 | 0.00114685 | Campylobacteraceae         | EasyDNA vs InnuPURE          |
| 2576.15115 | 1.67665813 | 0.42907776 | 3.90758571 | 9.32E-05   | 0.00114975 | [Paraprevotellaceae]       | QIAstool vs QIAstool+BB      |
| 22.9687795 | -2.9199313 | 0.73813187 | -3.9558396 | 7.63E-05   | 0.00127111 | Helicobacteraceae          | EasyDNA vs QIAstool+BB       |
| 7.44045113 | 2.81616091 | 0.73648989 | 3.82376043 | 0.00013143 | 0.00138942 | Anaeroplasmataceae         | QIAstool vs QIAstool+BB      |
| 2576.15115 | 1.31919125 | 0.34980343 | 3.77123584 | 0.00016244 | 0.00144392 | [Paraprevotellaceae]       | EasyDNA vs FastDNA           |
| 14966.648  | -1.5772423 | 0.40923926 | -3.8540836 | 0.00011616 | 0.00145205 | Clostridiaceae             | EasyDNA vs QIAstool+BB       |
| 6226.33527 | 1.39826642 | 0.36161179 | 3.86676115 | 0.00011029 | 0.0016201  | Turicibacteraceae          | InnuPURE vs PowerSoil.HMP    |
| 20.723165  | -5.185472  | 1.34638073 | -3.8514158 | 0.00011744 | 0.0016201  | Pseudomonadaceae           | InnuPURE vs PowerSoil.HMP    |
| 71.0660634 | -1.8593941 | 0.49253655 | -3.7751394 | 0.00015992 | 0.0016201  | Alcaligenaceae             | InnuPURE vs PowerSoil.HMP    |
| 216.46708  | -4.7736527 | 1.26699265 | -3.7677036 | 0.00016476 | 0.0016201  | Bacteroidaceae             | InnuPURE vs PowerSoil.HMP    |
| 216.46708  | -4.9350175 | 1.29105875 | -3.8224577 | 0.00013213 | 0.00182337 | Bacteroidaceae             | FastDNA vs PowerSoil.HMP     |
| 810.892629 | -2.373461  | 0.62905633 | -3.7730501 | 0.00016126 | 0.00185453 | Erysipelotrichaceae        | FastDNA vs PowerSoil.HMP     |
| 1329.00016 | -1.1967679 | 0.32086779 | -3.7297852 | 0.00019164 | 0.00191643 | Peptostreptococcaceae      | EasyDNA vs QIAstool+BB       |
| 9.6383629  | -2.1679125 | 0.6068059  | -3.5726621 | 0.00035337 | 0.00206586 | Fibrobacteraceae           | EasyDNA vs QIAstool          |
| 15.4343002 | 1.84120962 | 0.50412692 | 3.65227395 | 0.00025993 | 0.00216607 | Corynebacteriaceae         | EasyDNA vs QIAstool+BB       |
| 71.0660634 | -1.6471299 | 0.4610371  | -3.5726625 | 0.00035337 | 0.00242942 | Alcaligenaceae             | InnuPURE vs MagNAPure        |
| 216.46708  | -4.4629635 | 1.20206834 | -3.7127369 | 0.00020503 | 0.00259705 | Bacteroidaceae             | EasyDNA vs PowerSoil.HMP     |
| 254.614729 | -1.1032288 | 0.29278195 | -3.7680902 | 0.0001645  | 0.002651   | S24-7                      | EasyDNA vs MagNAPure         |
| 1329.00016 | -1.0622194 | 0.28366823 | -3.7445834 | 0.00018069 | 0.002651   | Peptostreptococcaceae      | EasyDNA vs MagNAPure         |
| 15.4343002 | 1.90293704 | 0.50943828 | 3.73536328 | 0.00018744 | 0.002651   | Corynebacteriaceae         | EasyDNA vs MagNAPure         |

bioRxiv preprint doi: <https://doi.org/10.1101/064394>; this version posted July 18, 2016. The copyright holder for this preprint (which was not certified by peer review) is the author/funder, who has granted bioRxiv a license to display the preprint in perpetuity. It is made available under aCC-BY 4.0 International license.

|            |            |            |            |            |            |                            |                              |
|------------|------------|------------|------------|------------|------------|----------------------------|------------------------------|
| 71.0660634 | -2.2797188 | 0.62584767 | -3.6426097 | 0.00020989 | 0.00260052 | Alcaligenaceae             | FastDNA vs PowerSoil.HMP     |
| 14966.648  | -1.2167365 | 0.33050128 | -3.6814881 | 0.00023188 | 0.00286947 | Clostridiaceae             | EasyDNA vs MagNAPure         |
| 576.775751 | 1.44962715 | 0.4050545  | 3.57884468 | 0.00034512 | 0.00290884 | Streptococcaceae           | InnuPURE vs PowerSoil.HMP    |
| 86.5992792 | 2.99949869 | 0.85659517 | 3.5016526  | 0.00046238 | 0.00300548 | Porphyromonadaceae         | FastDNA vs InnuPURE          |
| 4.16403335 | 5.96645628 | 1.75160616 | 3.4062773  | 0.00065855 | 0.00311715 | Carnobacteriaceae          | FastDNA vs QIAStool          |
| 15.8153467 | 5.10720894 | 1.40712282 | 3.62954026 | 0.00028393 | 0.00323676 | Moraxellaceae              | FastDNA vs QIAStool+BB       |
| 15.4343002 | 1.94734349 | 0.53872155 | 3.61474956 | 0.00030064 | 0.00326407 | Corynebacteriaceae         | EasyDNA vs PowerSoil.HMP     |
| 15.4343002 | 1.5357668  | 0.43958903 | 3.4936422  | 0.00047648 | 0.00333535 | Corynebacteriaceae         | EasyDNA vs InnuPURE          |
| 15.8153467 | 4.25898236 | 1.24098327 | 3.43194181 | 0.00059928 | 0.00346248 | Moraxellaceae              | FastDNA vs InnuPURE          |
| 62.3051996 | -2.2078122 | 0.62740538 | -3.5189565 | 0.00043325 | 0.00346598 | Enterobacteriaceae         | EasyDNA vs FastDNA           |
| 75.3501469 | -2.899597  | 0.86109053 | -3.3673544 | 0.00075893 | 0.00394644 | Mycoplasmataceae           | FastDNA vs InnuPURE          |
| 2576.15115 | -1.0433121 | 0.30923781 | -3.3738179 | 0.00074133 | 0.00402438 | [Paraprevotellaceae]       | EasyDNA vs QIAStool          |
| 23.2927606 | 6.98533528 | 1.92158786 | 3.63518912 | 0.00027778 | 0.00426411 | Aerococcaceae              | PowerSoil.HMP vs MagNAPure   |
| 30.2465249 | 5.15082886 | 1.43392754 | 3.59211237 | 0.00032801 | 0.00426411 | Verrucomicrobiaceae        | PowerSoil.HMP vs MagNAPure   |
| 30.2465249 | -4.7520422 | 1.38719877 | -3.425639  | 0.00061336 | 0.00452349 | Verrucomicrobiaceae        | InnuPURE vs PowerSoil.HMP    |
| 408.703374 | 1.97172535 | 0.56084378 | 3.51564092 | 0.00043869 | 0.00456242 | Lactobacillaceae           | PowerSoil.HMP vs MagNAPure   |
| 35.1041071 | -2.1864228 | 0.662999   | -3.2977769 | 0.00097454 | 0.00460689 | Peptococcaceae             | FastDNA vs InnuPURE          |
| 29.6083625 | -1.3718487 | 0.40734356 | -3.3677929 | 0.00075772 | 0.00463054 | [Mogibacteriaceae]         | InnuPURE vs MagNAPure        |
| 254.614729 | -1.1302528 | 0.33388242 | -3.3851821 | 0.00071131 | 0.00466304 | S24-7                      | InnuPURE vs PowerSoil.HMP    |
| 35.1041071 | 1.73722724 | 0.45243877 | 3.83969578 | 0.00012319 | 0.00476323 | Peptococcaceae             | QIAStool+BB vs MagNAPure     |
| 4.00044772 | 5.78336799 | 1.78215296 | 3.24515803 | 0.00117385 | 0.0050867  | Cytophagaceae              | FastDNA vs InnuPURE          |
| 1574.16355 | 1.17263609 | 0.35784849 | 3.27690659 | 0.00104951 | 0.00524755 | Lachnospiraceae            | PowerSoil.HMP vs QIAStool    |
| 71.0660634 | -2.0674546 | 0.60167145 | -3.4361853 | 0.00058997 | 0.00547827 | Alcaligenaceae             | FastDNA vs MagNAPure         |
| 29.6083625 | 1.43379183 | 0.42701614 | 3.35769937 | 0.00078594 | 0.00561386 | [Mogibacteriaceae]         | EasyDNA vs QIAStool+BB       |
| 23.2927606 | -6.4898889 | 1.90765791 | -3.4020192 | 0.0006689  | 0.00576926 | Aerococcaceae              | FastDNA vs PowerSoil.HMP     |
| 29.6083625 | 1.05593006 | 0.32473651 | 3.25165181 | 0.00114736 | 0.00581332 | [Mogibacteriaceae]         | EasyDNA vs QIAStool          |
| 908.726526 | -1.4420041 | 0.41614103 | -3.4651814 | 0.00052987 | 0.00582861 | Veillonellaceae            | EasyDNA vs MagNAPure         |
| 5.3314072  | -4.298708  | 1.25525218 | -3.4245772 | 0.00061576 | 0.00584969 | [Methanomassiliicoccaceae] | EasyDNA vs PowerSoil.HMP     |
| 576.775751 | 1.75562174 | 0.47291523 | 3.71233916 | 0.00020535 | 0.00595522 | Streptococcaceae           | QIAStool+BB vs MagNAPure     |
| 32.5255849 | 4.24277218 | 1.31620267 | 3.22349458 | 0.00126637 | 0.00601524 | Staphylococcaceae          | EasyDNA vs QIAStool          |
| 88.4317884 | 1.85557658 | 0.56238288 | 3.29948979 | 0.00096861 | 0.0060538  | Coriobacteriaceae          | EasyDNA vs QIAStool+BB       |
| 254.614729 | -1.1064385 | 0.33329617 | -3.3196856 | 0.00090119 | 0.00703253 | S24-7                      | FastDNA vs MagNAPure         |
| 7308.6798  | -0.8575932 | 0.26003373 | -3.2980077 | 0.00097373 | 0.00703253 | Prevotellaceae             | FastDNA vs MagNAPure         |
| 5.3314072  | 3.37108488 | 1.05056705 | 3.2088241  | 0.00133279 | 0.00721928 | [Methanomassiliicoccaceae] | InnuPURE vs QIAStool         |
| 42.1528852 | -3.1585672 | 0.98137257 | -3.21852   | 0.00128854 | 0.00760239 | Bifidobacteriaceae         | InnuPURE vs PowerSoil.HMP    |
| 408.703374 | 1.67631844 | 0.50776167 | 3.3013883  | 0.00096208 | 0.0081242  | Lactobacillaceae           | EasyDNA vs PowerSoil.HMP     |
| 576.775751 | -1.4502357 | 0.44128745 | -3.2863743 | 0.00101486 | 0.00856339 | Streptococcaceae           | QIAStool vs QIAStool+BB      |
| 908.726526 | 1.66195963 | 0.50683851 | 3.27907132 | 0.00104149 | 0.00856339 | Veillonellaceae            | QIAStool vs QIAStool+BB      |
| 20.723165  | 4.83629545 | 1.47007325 | 3.28983298 | 0.00100247 | 0.00922271 | Pseudomonadaceae           | PowerSoil.HMP vs QIAStool+BB |
| 408.703374 | 1.48842239 | 0.47936509 | 3.10498703 | 0.00190287 | 0.00951437 | Lactobacillaceae           | InnuPURE vs QIAStool         |
| 367.01539  | 2.08867133 | 0.64924642 | 3.2170702  | 0.00129507 | 0.00958351 | Spirochaetaceae            | QIAStool vs QIAStool+BB      |
| 4.00044772 | 4.90531979 | 1.59999884 | 3.06582709 | 0.00217069 | 0.00963243 | Cytophagaceae              | FastDNA vs QIAStool          |
| 23.2927606 | -6.0628195 | 1.88263038 | -3.2203982 | 0.00128013 | 0.00972896 | Aerococcaceae              | EasyDNA vs PowerSoil.HMP     |
| 15.8153467 | 4.05506684 | 1.27803736 | 3.172886   | 0.00150932 | 0.00981057 | Moraxellaceae              | FastDNA vs MagNAPure         |
| 88.4317884 | -1.5247829 | 0.49109684 | -3.1048518 | 0.00190374 | 0.01047059 | Coriobacteriaceae          | InnuPURE vs MagNAPure        |
| 5.3314072  | -3.7627421 | 1.19345081 | -3.1528255 | 0.00161698 | 0.0108779  | [Methanomassiliicoccaceae] | QIAStool vs QIAStool+BB      |
| 42.1528852 | 2.69033662 | 0.88649264 | 3.03480989 | 0.00240687 | 0.01117477 | Bifidobacteriaceae         | PowerSoil.HMP vs QIAStool    |
| 23.2927606 | 6.07256394 | 1.92001451 | 3.16276981 | 0.00156276 | 0.01192028 | Aerococcaceae              | PowerSoil.HMP vs QIAStool+BB |
| 408.703374 | -2.0259403 | 0.64952423 | -3.1191143 | 0.00181396 | 0.01192028 | Lactobacillaceae           | PowerSoil.HMP vs QIAStool+BB |
| 810.892629 | -1.9297672 | 0.62539388 | -3.0856829 | 0.00203085 | 0.01200049 | Erysipelotrichaceae        | FastDNA vs MagNAPure         |
| 62.3051996 | 1.8473546  | 0.62901353 | 2.93690754 | 0.00331503 | 0.01326012 | Enterobacteriaceae         | FastDNA vs InnuPURE          |
| 29.6083625 | 1.83023832 | 0.58732018 | 3.11625309 | 0.00183165 | 0.01332109 | [Mogibacteriaceae]         | EasyDNA vs FastDNA           |
| 7308.6798  | -0.8282503 | 0.26169677 | -3.1649236 | 0.00155124 | 0.01344405 | Prevotellaceae             | PowerSoil.HMP vs MagNAPure   |
| 810.892629 | -1.5061467 | 0.51416507 | -2.9293057 | 0.0033972  | 0.01490319 | Erysipelotrichaceae        | EasyDNA vs QIAStool          |
| 75.3501469 | -2.1087165 | 0.72280839 | -2.9173935 | 0.0035297  | 0.01490319 | Mycoplasmataceae           | EasyDNA vs QIAStool          |
| 20.723165  | 4.16353174 | 1.34986951 | 3.08439573 | 0.00203966 | 0.01515177 | Pseudomonadaceae           | PowerSoil.HMP vs MagNAPure   |
| 86.5992792 | -2.5986406 | 0.87070194 | -2.9845352 | 0.0028401  | 0.01523324 | Porphyromonadaceae         | InnuPURE vs PowerSoil.HMP    |
| 30.7423537 | -1.6327572 | 0.56577317 | -2.8858865 | 0.00390313 | 0.01561251 | Elusimicrobiaceae          | EasyDNA vs QIAStool          |
| 29.6083625 | 1.32991944 | 0.43726084 | 3.04147851 | 0.00235419 | 0.01626534 | [Mogibacteriaceae]         | EasyDNA vs PowerSoil.HMP     |
| 22.9687795 | 1.79757037 | 0.62321785 | 2.8843371  | 0.00392239 | 0.01638173 | Helicobacteraceae          | FastDNA vs QIAStool          |
| 62.3051996 | 2.29684119 | 0.73468911 | 3.12627637 | 0.00177035 | 0.01681833 | Enterobacteriaceae         | FastDNA vs QIAStool+BB       |
| 908.726526 | -1.1737315 | 0.4109824  | -2.8559168 | 0.00429128 | 0.0169267  | Veillonellaceae            | FastDNA vs QIAStool          |
| 22.9687795 | -1.8651642 | 0.54282237 | -3.4360489 | 0.00059026 | 0.01771725 | Helicobacteraceae          | QIAStool vs MagNAPure        |
| 5.3314072  | -3.6505736 | 1.06984005 | -3.4122611 | 0.00064426 | 0.01771725 | [Methanomassiliicoccaceae] | QIAStool vs MagNAPure        |
| 17.2832685 | -2.4187504 | 0.86002934 | -2.8124045 | 0.00491726 | 0.01837503 | Desulfovibrionaceae        | FastDNA vs QIAStool          |
| 1.66132016 | 4.416643   | 1.57030905 | 2.81259475 | 0.00491435 | 0.01867455 | Leuconostocaceae           | EasyDNA vs QIAStool          |
| 4.00044772 | 5.29050645 | 1.80899893 | 2.92454925 | 0.00344955 | 0.01868509 | Cytophagaceae              | FastDNA vs MagNAPure         |
| 5.8077209  | -2.1252395 | 0.74134296 | -2.8667427 | 0.0041472  | 0.01925486 | Dethiosulfovibrionaceae    | InnuPURE vs QIAStool         |
| 31.9177507 | -1.3581394 | 0.47904029 | -2.8351256 | 0.00458077 | 0.01984999 | Succinivibrionaceae        | InnuPURE vs QIAStool         |
| 9.6383629  | -1.5817218 | 0.5627087  | -2.810907  | 0.00494021 | 0.02006959 | Fibrobacteraceae           | InnuPURE vs QIAStool         |

bioRxiv preprint doi: <https://doi.org/10.1101/064394>; this version posted July 18, 2016. The copyright holder for this preprint (which was not certified by peer review) is the author/funder, who has granted bioRxiv a license to display the preprint in perpetuity. It is made available under aCC-BY 4.0 International license.

|            |            |            |            |            |            |                            |                              |
|------------|------------|------------|------------|------------|------------|----------------------------|------------------------------|
| 1574.16355 | -1.0713078 | 0.36311938 | -2.9502908 | 0.00317475 | 0.02810679 | Lachnospiraceae            | EasyDNA vs PowerSoil.HMP     |
| 22.9687795 | -1.8202879 | 0.62049856 | -2.9335893 | 0.00335067 | 0.02066248 | Helicobacteraceae          | QIAStool vs QIAStool+BB      |
| 35.1041071 | -2.0646688 | 0.68555435 | -3.0116778 | 0.00259808 | 0.02115581 | Peptococcaceae             | FastDNA vs QIAStool+BB       |
| 1574.16355 | -1.1146482 | 0.39092455 | -2.8513128 | 0.00435391 | 0.02140673 | Lachnospiraceae            | InnuPURE vs PowerSoil.HMP    |
| 71.0660634 | -1.3942701 | 0.48029311 | -2.9029567 | 0.00369658 | 0.02161076 | Alcaligenaceae             | EasyDNA vs PowerSoil.HMP     |
| 31.9177507 | 2.50733503 | 0.858128   | 2.92186602 | 0.00347941 | 0.02319608 | Succinivibrionaceae        | EasyDNA vs FastDNA           |
| 31.9177507 | -2.4656281 | 0.87371635 | -2.8220006 | 0.00477251 | 0.02386254 | Succinivibrionaceae        | FastDNA vs MagNAPure         |
| 20.723165  | -4.4393022 | 1.50402412 | -2.9516164 | 0.00316115 | 0.02423551 | Pseudomonadaceae           | FastDNA vs PowerSoil.HMP     |
| 35.1041071 | 0.97662205 | 0.3461751  | 2.82117935 | 0.00478474 | 0.02483044 | Peptococcaceae             | EasyDNA vs QIAStool+BB       |
| 5.3314072  | -3.7073919 | 1.31972034 | -2.8092254 | 0.00496609 | 0.02483044 | [Methanomassiliicoccaceae] | EasyDNA vs QIAStool+BB       |
| 88.4317884 | 1.46816717 | 0.5184466  | 2.83185802 | 0.00462784 | 0.02512256 | Coriobacteriaceae          | EasyDNA vs PowerSoil.HMP     |
| 35.1041071 | 0.85486803 | 0.29757508 | 2.87278099 | 0.00406876 | 0.02563319 | Peptococcaceae             | EasyDNA vs InnuPURE          |
| 35.1041071 | 1.08141422 | 0.39086961 | 2.76668788 | 0.00566289 | 0.02570083 | Peptococcaceae             | InnuPURE vs PowerSoil.HMP    |
| 23.2927606 | -5.16892   | 1.89209931 | -2.7318439 | 0.0062981  | 0.02654198 | Aerococcaceae              | InnuPURE vs PowerSoil.HMP    |
| 30.7423537 | -1.9203408 | 0.72425206 | -2.6514814 | 0.00801395 | 0.02844954 | Elusimicrobiaceae          | FastDNA vs QIAStool          |
| 1329.00016 | -0.6591519 | 0.24790456 | -2.6588937 | 0.00783977 | 0.0294383  | Peptostreptococcaceae      | InnuPURE vs QIAStool         |
| 7308.6798  | -0.6240217 | 0.23586236 | -2.6457027 | 0.00815214 | 0.0294383  | Prevotellaceae             | InnuPURE vs QIAStool         |
| 7.94956632 | 2.35515765 | 0.88703846 | 2.65507951 | 0.00792897 | 0.02945047 | Christensenellaceae        | FastDNA vs InnuPURE          |
| 5.3314072  | -3.5952234 | 1.21352904 | -2.9626183 | 0.00305035 | 0.03019842 | [Methanomassiliicoccaceae] | EasyDNA vs MagNAPure         |
| 2576.15115 | -1.0787948 | 0.38112544 | -2.8305504 | 0.0046468  | 0.03020419 | [Paraprevotellaceae]       | PowerSoil.HMP vs MagNAPure   |
| 14966.648  | -1.2133493 | 0.43533275 | -2.7871767 | 0.00531695 | 0.03057245 | Clostridiaceae             | PowerSoil.HMP vs QIAStool+BB |
| 4.2789796  | -4.8902304 | 1.84214054 | -2.6546457 | 0.00793918 | 0.03122742 | Xanthomonadaceae           | InnuPURE vs PowerSoil.HMP    |
| 75.3501469 | 2.20086404 | 0.8067117  | 2.72819154 | 0.00636826 | 0.03184131 | Mycoplasmataceae           | InnuPURE vs MagNAPure        |
| 408.703374 | 1.26821609 | 0.4885714  | 2.59576407 | 0.00943808 | 0.03190972 | Lactobacillaceae           | FastDNA vs QIAStool          |
| 62.3051996 | 1.47645817 | 0.57256579 | 2.57866992 | 0.00991815 | 0.03200858 | Enterobacteriaceae         | FastDNA vs QIAStool          |
| 5.3314072  | -3.3157346 | 1.1972195  | -2.7695294 | 0.00561373 | 0.03215138 | [Methanomassiliicoccaceae] | EasyDNA vs InnuPURE          |
| 1019.42191 | -1.6633229 | 0.59035526 | -2.8174948 | 0.00483999 | 0.03448493 | Campylobacteraceae         | FastDNA vs QIAStool+BB       |
| 8.45632111 | 5.03537667 | 1.90368579 | 2.64506711 | 0.00816747 | 0.03539238 | Rikenellaceae              | PowerSoil.HMP vs QIAStool    |
| 2.95003546 | 4.7042716  | 1.82149714 | 2.58264012 | 0.00980475 | 0.03548387 | Actinomycetaceae           | EasyDNA vs QIAStool          |
| 1019.42191 | 1.26709688 | 0.45944542 | 2.75788338 | 0.00581769 | 0.0358012  | Campylobacteraceae         | EasyDNA vs FastDNA           |
| 1.25729577 | 3.9531204  | 1.56655913 | 2.52344155 | 0.01162124 | 0.03587426 | Methanobacteriaceae        | FastDNA vs QIAStool          |
| 9.6383629  | -1.9706676 | 0.68484384 | -2.8775431 | 0.00400785 | 0.03607067 | Fibrobacteraceae           | EasyDNA vs MagNAPure         |
| 7308.6798  | 0.63923894 | 0.23698127 | 2.69742385 | 0.00698783 | 0.03668609 | Prevotellaceae             | EasyDNA vs InnuPURE          |
| 7.44045113 | 2.10035711 | 0.79576123 | 2.6394313  | 0.00830453 | 0.03774784 | Anaeroplasmataceae         | EasyDNA vs QIAStool+BB       |
| 6226.33527 | 0.93024556 | 0.31721125 | 2.93257433 | 0.00336164 | 0.0381879  | Turicibacteraceae          | QIAStool vs MagNAPure        |
| 88.4317884 | -1.3038581 | 0.44554611 | -2.9264268 | 0.0034288  | 0.0381879  | Coriobacteriaceae          | QIAStool vs MagNAPure        |
| 32.5255849 | -3.9854437 | 1.38548882 | -2.8765614 | 0.00402034 | 0.0381879  | Staphylococcaceae          | QIAStool vs MagNAPure        |
| 254.614729 | 0.76254431 | 0.27049763 | 2.81904245 | 0.00481671 | 0.0381879  | S24-7                      | QIAStool vs MagNAPure        |
| 1574.16355 | -0.9682183 | 0.35443007 | -2.7317613 | 0.00629968 | 0.0381879  | Lachnospiraceae            | QIAStool vs MagNAPure        |
| 14.253878  | 2.0500995  | 0.75196855 | 2.72631018 | 0.00640468 | 0.0381879  | Pirellulaceae              | QIAStool vs MagNAPure        |
| 1019.42191 | 1.19581281 | 0.43898336 | 2.72405041 | 0.00644867 | 0.0381879  | Campylobacteraceae         | QIAStool vs MagNAPure        |
| 367.01539  | 1.41359659 | 0.52364085 | 2.69955368 | 0.00694326 | 0.0381879  | Spirochaetaceae            | QIAStool vs MagNAPure        |
| 88.4317884 | -1.499253  | 0.60509226 | -2.4777262 | 0.01322226 | 0.03911584 | Coriobacteriaceae          | FastDNA vs QIAStool          |
| 42.1528852 | -2.6816693 | 0.99400689 | -2.6978378 | 0.00697914 | 0.03972744 | Bifidobacteriaceae         | QIAStool vs QIAStool+BB      |
| 254.614729 | 0.77942167 | 0.29736518 | 2.62109257 | 0.00876485 | 0.04149089 | S24-7                      | EasyDNA vs InnuPURE          |
| 20.723165  | 3.34261958 | 1.28892921 | 2.59333062 | 0.00950513 | 0.04149089 | Pseudomonadaceae           | EasyDNA vs InnuPURE          |
| 5.22647741 | 4.53504399 | 1.75773924 | 2.58004366 | 0.00987878 | 0.04149089 | Sphingobacteriaceae        | EasyDNA vs InnuPURE          |
| 17.2832685 | 1.59191715 | 0.99881224 | 2.65402579 | 0.00795377 | 0.04204138 | Desulfovibrionaceae        | QIAStool vs QIAStool+BB      |
| 5.22647741 | 5.05202816 | 1.82265879 | 2.77179041 | 0.00557489 | 0.04331319 | Sphingobacteriaceae        | EasyDNA vs MagNAPure         |
| 13.1827693 | -2.4080017 | 0.87080204 | -2.7652688 | 0.00568759 | 0.04331319 | RF16                       | EasyDNA vs MagNAPure         |
| 4.16403335 | 4.73703395 | 1.82302293 | 2.59845001 | 0.00936457 | 0.04347835 | Carnobacteriaceae          | FastDNA vs MagNAPure         |
| 2.29903269 | -4.3063622 | 1.6450049  | -2.6178416 | 0.00884879 | 0.04483386 | Deferribacteraceae         | EasyDNA vs PowerSoil.HMP     |
| 4.16403335 | 4.24556219 | 1.70906431 | 2.48414419 | 0.01298632 | 0.04486184 | Carnobacteriaceae          | EasyDNA vs QIAStool          |
| 6226.33527 | -0.7266515 | 0.29467249 | -2.4659632 | 0.01366454 | 0.04515238 | Turicibacteraceae          | EasyDNA vs QIAStool          |
| 810.892629 | -1.5452431 | 0.62495608 | -2.4725627 | 0.01341482 | 0.0465047  | Erysipelotrichaceae        | FastDNA vs InnuPURE          |
| 13.1827693 | -2.0388951 | 0.78399797 | -2.6006383 | 0.00930505 | 0.04652525 | RF16                       | QIAStool vs MagNAPure        |
| 1019.42191 | 1.28455598 | 0.48482082 | 2.64954788 | 0.00805996 | 0.04656863 | Campylobacteraceae         | PowerSoil.HMP vs MagNAPure   |
| 2.05453403 | 3.06422851 | 1.22184327 | 2.50787363 | 0.01214601 | 0.04934316 | [Cericococcaceae]          | PowerSoil.HMP vs QIAStool    |
| 2.05453403 | -3.5994508 | 1.41189289 | -2.5493795 | 0.01079148 | 0.05096371 | [Cericococcaceae]          | EasyDNA vs PowerSoil.HMP     |
| 75.3501469 | -2.0844308 | 0.82480975 | -2.5271656 | 0.01149873 | 0.05096371 | Mycoplasmataceae           | EasyDNA vs PowerSoil.HMP     |
| 2576.15115 | 0.88393503 | 0.352154   | 2.51008088 | 0.01207035 | 0.05096371 | [Paraprevotellaceae]       | EasyDNA vs PowerSoil.HMP     |
| 8.45632111 | -4.7100683 | 1.89200483 | -2.4894589 | 0.01279377 | 0.05117508 | Rikenellaceae              | EasyDNA vs PowerSoil.HMP     |
| 1329.00016 | -0.708884  | 0.28201899 | -2.5136037 | 0.01195046 | 0.05213896 | Peptostreptococcaceae      | InnuPURE vs MagNAPure        |
| 17.2832685 | -1.5355685 | 0.61355598 | -2.5027357 | 0.01232375 | 0.05213896 | Desulfovibrionaceae        | InnuPURE vs MagNAPure        |
| 4.16403335 | 4.13609738 | 1.72422814 | 2.39881097 | 0.0164484  | 0.05345731 | Carnobacteriaceae          | FastDNA vs InnuPURE          |
| 7.44045113 | 2.72371757 | 0.77809085 | 3.50051356 | 0.00046436 | 0.05386606 | Anaeroplasmataceae         | InnuPURE vs QIAStool+BB      |
| 5.8077209  | -2.048274  | 0.83138022 | -2.463703  | 0.013751   | 0.05402178 | Dethiosulfovibrionaceae    | InnuPURE vs MagNAPure        |
| 15.4343002 | 1.75738715 | 0.67749264 | 2.59395756 | 0.00948782 | 0.05421611 | Corynebacteriaceae         | EasyDNA vs FastDNA           |
| 29.6083625 | -1.5032074 | 0.60411383 | -2.488285  | 0.01283608 | 0.05562303 | [Mogibacteriaceae]         | FastDNA vs MagNAPure         |
| 14.253878  | 2.21225682 | 0.86748571 | 2.55019397 | 0.0107663  | 0.05598476 | Pirellulaceae              | PowerSoil.HMP vs MagNAPure   |



bioRxiv preprint doi: <https://doi.org/10.1101/064394>; this version posted July 18, 2016. The copyright holder for this preprint (which was not certified by peer review) is the author/funder, who has granted bioRxiv a license to display the preprint in perpetuity. It is made available under aCC-BY 4.0 International license.

|            |            |            |            |            |            |                            |                              |
|------------|------------|------------|------------|------------|------------|----------------------------|------------------------------|
| 810.892629 | -1.4020193 | 0.57490323 | -2.4387049 | 0.01474    | 0.05601199 | Erysipelotrichaceae        | EasyDNA vs PowerSoil.HMP     |
| 2.29903269 | -3.8386124 | 1.56814864 | -2.4478626 | 0.01437064 | 0.05658441 | Deferribacteraceae         | EasyDNA vs InnuPURE          |
| 908.726526 | -1.0058792 | 0.41567683 | -2.4198587 | 0.01552654 | 0.05753952 | Veillonellaceae            | EasyDNA vs InnuPURE          |
| 1019.42191 | -0.9445218 | 0.40055924 | -2.3580077 | 0.01837331 | 0.05818216 | Campylobacteraceae         | EasyDNA vs QIAStool          |
| 71.0660634 | -1.1820059 | 0.44790155 | -2.638986  | 0.00831544 | 0.05880205 | Alcaligenaceae             | EasyDNA vs MagNAPure         |
| 2.63481049 | 4.11471371 | 1.78335384 | 2.30728957 | 0.02103868 | 0.05943999 | Cryomorphaceae             | FastDNA vs QIAStool          |
| 14.253878  | -2.3206117 | 1.01141826 | -2.2944135 | 0.02176676 | 0.05943999 | Pirellulaceae              | FastDNA vs QIAStool          |
| 5.3314072  | -4.2593782 | 1.62243256 | -2.6253037 | 0.00865717 | 0.05973448 | [Methanomassiliococcaceae] | FastDNA vs PowerSoil.HMP     |
| 2576.15115 | 0.8484523  | 0.34193436 | 2.48133089 | 0.01308928 | 0.05999253 | [Paraprevotellaceae]       | QIAStool vs MagNAPure        |
| 576.775751 | -1.100544  | 0.43076515 | -2.5548584 | 0.0106231  | 0.06126359 | Streptococcaceae           | FastDNA vs PowerSoil.HMP     |
| 31.9177507 | -2.2924488 | 0.90657913 | -2.5286804 | 0.01144922 | 0.06126359 | Succinivibrionaceae        | FastDNA vs PowerSoil.HMP     |
| 15.8153467 | 3.36640237 | 1.3327887  | 2.52583353 | 0.01154242 | 0.06126359 | Moraxellaceae              | FastDNA vs PowerSoil.HMP     |
| 408.703374 | 1.21382263 | 0.49751615 | 2.4397653  | 0.01469681 | 0.0621788  | Lactobacillaceae           | QIAStool vs MagNAPure        |
| 8.45632111 | 4.57043088 | 1.84612969 | 2.47568246 | 0.01329818 | 0.06286412 | Rikenellaceae              | PowerSoil.HMP vs MagNAPure   |
| 15.8153467 | -2.986528  | 1.18870072 | -2.5124305 | 0.01199027 | 0.06394811 | Moraxellaceae              | EasyDNA vs FastDNA           |
| 7.44045113 | -2.4644294 | 0.82396759 | -2.99093   | 0.00278129 | 0.06452599 | Anaeroplasmataceae         | QIAStool+BB vs MagNAPure     |
| 254.614729 | 0.77621196 | 0.33732155 | 2.30110398 | 0.02138575 | 0.06541525 | S24-7                      | FastDNA vs InnuPURE          |
| 1.25729577 | 3.29462871 | 1.41071562 | 2.3354308  | 0.01952093 | 0.06678212 | Methanobacteriaceae        | InnuPURE vs QIAStool         |
| 30.2465249 | -3.1037748 | 1.32591991 | -2.3408463 | 0.01924008 | 0.06907747 | Verrucomicrobiaceae        | EasyDNA vs PowerSoil.HMP     |
| 1329.00016 | -0.7318973 | 0.31460229 | -2.3264208 | 0.01999611 | 0.06907747 | Peptostreptococcaceae      | EasyDNA vs PowerSoil.HMP     |
| 7.94956632 | 1.80438583 | 0.77397907 | 2.33131089 | 0.01973697 | 0.06907794 | Christensenellaceae        | EasyDNA vs InnuPURE          |
| 1574.16355 | -0.9102305 | 0.38780387 | -2.3471412 | 0.01891808 | 0.0693663  | Lachnospiraceae            | InnuPURE vs MagNAPure        |
| 30.2465249 | 2.8646008  | 1.26008035 | 2.27334773 | 0.02300523 | 0.06993591 | Verrucomicrobiaceae        | EasyDNA vs QIAStool          |
| 7308.6798  | -0.5854122 | 0.25988525 | -2.2525795 | 0.02428568 | 0.07015862 | Prevotellaceae             | FastDNA vs InnuPURE          |
| 8.45632111 | -4.399111  | 1.79521351 | -2.4504667 | 0.01426711 | 0.07031649 | Rikenellaceae              | FastDNA vs PowerSoil.HMP     |
| 8.45632111 | 4.29348299 | 1.74750758 | 2.45691809 | 0.01401346 | 0.07049952 | Rikenellaceae              | PowerSoil.HMP vs QIAStool+BB |
| 32.5255849 | 3.84761504 | 1.60906299 | 2.39121468 | 0.01769273 | 0.07049952 | Staphylococcaceae          | PowerSoil.HMP vs QIAStool+BB |
| 2516.24433 | 0.64083569 | 0.26815705 | 2.38977754 | 0.01685858 | 0.07049952 | Ruminococcaceae            | PowerSoil.HMP vs QIAStool+BB |
| 7308.6798  | -0.916953  | 0.31545518 | -2.9067617 | 0.00365191 | 0.07060364 | Prevotellaceae             | QIAStool+BB vs MagNAPure     |
| 1019.42191 | -1.0332649 | 0.45044532 | -2.2938743 | 0.02179772 | 0.07202725 | Campylobacteraceae         | EasyDNA vs PowerSoil.HMP     |
| 32.5255849 | -3.3654336 | 1.44833673 | -2.3236541 | 0.02014404 | 0.07428114 | Staphylococcaceae          | InnuPURE vs PowerSoil.HMP    |
| 5.22647741 | 4.41383425 | 1.81274855 | 2.434885   | 0.01489652 | 0.07448262 | Sphingobacteriaceae        | EasyDNA vs FastDNA           |
| 4.2789796  | 4.42090287 | 1.86386076 | 2.37190619 | 0.01769658 | 0.07448975 | Xanthomonadaceae           | PowerSoil.HMP vs MagNAPure   |
| 14966.648  | -0.8528435 | 0.36244882 | -2.3530039 | 0.01862244 | 0.07448975 | Clostridiaceae             | PowerSoil.HMP vs MagNAPure   |
| 42.1528852 | 2.1770014  | 0.86093835 | 2.52863796 | 0.01145061 | 0.07557401 | Bifidobacteriaceae         | EasyDNA vs MagNAPure         |
| 31.9177507 | -1.9115858 | 0.86810273 | -2.2020272 | 0.02766339 | 0.07571032 | Succinivibrionaceae        | FastDNA vs InnuPURE          |
| 71.0660634 | 1.18925034 | 0.49362875 | 2.40919991 | 0.01598754 | 0.07887186 | Alcaligenaceae             | QIAStool vs QIAStool+BB      |
| 32.5255849 | 3.0928854  | 1.44133799 | 2.14584325 | 0.03188549 | 0.08290226 | Staphylococcaceae          | FastDNA vs InnuPURE          |
| 254.614729 | -0.7523977 | 0.32981434 | -2.2812764 | 0.0225321  | 0.08369064 | S24-7                      | PowerSoil.HMP vs MagNAPure   |
| 408.703374 | 1.16600506 | 0.49279223 | 2.36611902 | 0.01797566 | 0.08459136 | Lactobacillaceae           | EasyDNA vs FastDNA           |
| 88.4317884 | -1.591849  | 0.67867494 | -2.345525  | 0.0190003  | 0.0874014  | Coriobacteriaceae          | FastDNA vs PowerSoil.HMP     |
| 367.01539  | -1.3611864 | 0.59325355 | -2.294443  | 0.02176507 | 0.08842059 | Spirochaetaceae            | FastDNA vs MagNAPure         |
| 88.4317884 | -1.211262  | 0.54246601 | -2.232881  | 0.0255568  | 0.08859689 | Coriobacteriaceae          | PowerSoil.HMP vs MagNAPure   |
| 17.2832685 | -1.4788953 | 0.66253337 | -2.2321824 | 0.02560291 | 0.08865293 | Desulfovibrionaceae        | InnuPURE vs PowerSoil.HMP    |
| 8.45632111 | -4.1252908 | 1.86593498 | -2.2108438 | 0.02704666 | 0.08865293 | Rikenellaceae              | InnuPURE vs PowerSoil.HMP    |
| 408.703374 | -1.5156269 | 0.63804615 | -2.375419  | 0.01752904 | 0.09122372 | Lactobacillaceae           | FastDNA vs QIAStool+BB       |
| 7.94956632 | 2.22772913 | 0.93886337 | 2.37279374 | 0.01765412 | 0.09122372 | Christensenellaceae        | FastDNA vs QIAStool+BB       |
| 86.5992792 | 2.35593043 | 1.00429657 | 2.34585133 | 0.01898368 | 0.09122372 | Porphyrinomonadaceae       | FastDNA vs QIAStool+BB       |
| 2.60378858 | 4.2092934  | 1.79779891 | 2.34135941 | 0.01921366 | 0.09122372 | Rhodocyclaceae             | FastDNA vs QIAStool+BB       |
| 2516.24433 | 0.61507077 | 0.26609194 | 2.31149716 | 0.02080541 | 0.09122372 | Ruminococcaceae            | FastDNA vs QIAStool+BB       |
| 2.29903269 | 3.13747594 | 1.40445963 | 2.23393815 | 0.02548714 | 0.09345117 | Deferribacteraceae         | PowerSoil.HMP vs QIAStool    |
| 4.16403335 | 4.04801207 | 1.8168604  | 2.22802592 | 0.02587879 | 0.09345117 | Carnobacteriaceae          | PowerSoil.HMP vs QIAStool    |
| 62.3051996 | -1.4507519 | 0.631896   | -2.2958713 | 0.02168324 | 0.09350897 | Enterobacteriaceae         | FastDNA vs PowerSoil.HMP     |
| 29.6083625 | -1.0028885 | 0.45984104 | -2.180946  | 0.02918741 | 0.09485908 | [Mogibacteriaceae]         | PowerSoil.HMP vs MagNAPure   |
| 7.94956632 | -1.8663171 | 0.86386794 | -2.1604194 | 0.03074022 | 0.09545646 | Christensenellaceae        | InnuPURE vs PowerSoil.HMP    |
| 14.253878  | -2.4827691 | 1.09644696 | -2.2643768 | 0.02355095 | 0.09558915 | Pirellulaceae              | FastDNA vs PowerSoil.HMP     |
| 5.3314072  | -3.2764048 | 1.58511548 | -2.0669818 | 0.03873587 | 0.09591739 | [Methanomassiliococcaceae] | FastDNA vs InnuPURE          |
| 35.1041071 | -0.9596602 | 0.42884473 | -2.2377801 | 0.0252354  | 0.0967357  | Peptococcaceae             | PowerSoil.HMP vs QIAStool+BB |
| 2.95003546 | 4.04538074 | 1.85721321 | 2.17819942 | 0.02939119 | 0.09745501 | Actinomycetaceae           | EasyDNA vs InnuPURE          |
| 5.22647741 | 3.87561089 | 1.79473927 | 2.15942836 | 0.03081695 | 0.09758701 | Sphingobacteriaceae        | EasyDNA vs PowerSoil.HMP     |
| 32.5255849 | 3.57506683 | 1.60327104 | 2.22985804 | 0.02575687 | 0.09766893 | Staphylococcaceae          | FastDNA vs QIAStool+BB       |
| 5.3314072  | -3.6680621 | 1.66483055 | -2.2032645 | 0.02757611 | 0.09766893 | [Methanomassiliococcaceae] | FastDNA vs QIAStool+BB       |
| 4.00044772 | 3.823021   | 1.74418415 | 2.19186775 | 0.02838906 | 0.09766893 | Cytophagaceae              | FastDNA vs QIAStool+BB       |
| 2.63481049 | 4.11626382 | 1.88669558 | 2.18173184 | 0.02912933 | 0.09766893 | Cryomorphaceae             | FastDNA vs QIAStool+BB       |
| 31.9177507 | 1.3344078  | 0.57886073 | 2.3052312  | 0.02115363 | 0.09783553 | Succinivibrionaceae        | QIAStool vs QIAStool+BB      |
| 2.95003546 | 4.1628328  | 1.90223045 | 2.18839563 | 0.0286408  | 0.09798167 | Actinomycetaceae           | PowerSoil.HMP vs QIAStool    |
| 30.2465249 | -3.1673216 | 1.41854368 | -2.2327981 | 0.02556226 | 0.09798868 | Verrucomicrobiaceae        | FastDNA vs PowerSoil.HMP     |
| 2576.15115 | -0.7722792 | 0.37881863 | -2.0386515 | 0.04148482 | 0.09805502 | [Paraprevotellaceae]       | FastDNA vs InnuPURE          |
| 20.723165  | -2.6807638 | 1.24693501 | -2.1498826 | 0.03156451 | 0.09811055 | Pseudomonadaceae           | InnuPURE vs QIAStool         |
| 7.94956632 | -1.557632  | 0.72508445 | -2.1482077 | 0.03169726 | 0.09811055 | Christensenellaceae        | InnuPURE vs QIAStool         |



bioRxiv preprint doi: <https://doi.org/10.1101/064394>; this version posted July 18, 2016. The copyright holder for this preprint (which was not certified by peer review) is the author/funder, who has granted bioRxiv a license to display the preprint in perpetuity. It is made available under aCC-BY 4.0 International license.

|            |            |            |            |            |            |                            |                           |
|------------|------------|------------|------------|------------|------------|----------------------------|---------------------------|
| 7.46995934 | -1.5690896 | 0.72723812 | -2.1576009 | 0.03095888 | 0.09843754 | RP12                       | InnuPURE vs MagNAPure     |
| 22.9687795 | 1.19410946 | 0.55614757 | 2.14710901 | 0.0317846  | 0.09843754 | Helicobacteraceae          | InnuPURE vs MagNAPure     |
| 9.6383629  | -1.384477  | 0.64643194 | -2.1417212 | 0.03221592 | 0.09843754 | Fibrobacteraceae           | InnuPURE vs MagNAPure     |
| 9.6383629  | -1.8427971 | 0.80591343 | -2.2865943 | 0.02221951 | 0.09875339 | Fibrobacteraceae           | EasyDNA vs FastDNA        |
| 5.3314072  | -3.5558936 | 1.59551674 | -2.2286783 | 0.02583532 | 0.09878209 | [Methanomassiliicoccaceae] | FastDNA vs MagNAPure      |
| 1574.16355 | -0.86689   | 0.35975205 | -2.4096875 | 0.01596619 | 0.0987908  | Lachnospiraceae            | EasyDNA vs MagNAPure      |
| 7308.6798  | 0.55606923 | 0.26154925 | 2.12605939 | 0.03349831 | 0.09882003 | Prevotellaceae             | InnuPURE vs PowerSoil.HMP |
| 30.2465249 | 3.46560811 | 1.53285987 | 2.26087732 | 0.02376685 | 0.09902856 | Verrucomicrobiaceae        | EasyDNA vs QIAstool+BB    |
| 14966.648  | 0.71562954 | 0.32014118 | 2.23535608 | 0.02539398 | 0.09976207 | Clostridiaceae             | QIAstool vs MagNAPure     |
| 75.3501469 | -1.6556432 | 0.80348783 | -2.0605704 | 0.03934405 | 0.09978224 | Mycoplasmataceae           | FastDNA vs QIAstool       |
| 30.2465249 | 2.801054   | 1.35940485 | 2.06050023 | 0.03935074 | 0.09978224 | Verrucomicrobiaceae        | FastDNA vs QIAstool       |
| 8.41300461 | 2.92327159 | 1.38042248 | 2.11766444 | 0.0342035  | 0.09997945 | Neisseriaceae              | EasyDNA vs QIAstool       |

**Table S2C. Difference abundance of families - Sewage microbial community**

| baseMean   | log2FoldCha | lfcSE      | stat       | pvalue    | padj      | family                | compare                    |
|------------|-------------|------------|------------|-----------|-----------|-----------------------|----------------------------|
| 649.223144 | 6.82534658  | 0.30988145 | 22.0256701 | 1.63E-107 | 3.12E-105 | Bifidobacteriaceae    | EasyDNA vs QIAStool        |
| 649.223144 | 5.53968468  | 0.33942717 | 16.3206873 | 7.03E-60  | 1.15E-57  | Bifidobacteriaceae    | EasyDNA vs PowerSoil.HMP   |
| 858.112951 | 4.52279196  | 0.28850532 | 15.6766329 | 2.19E-55  | 3.13E-53  | Legionellaceae        | EasyDNA vs FastDNA         |
| 649.223144 | 4.65718093  | 0.31803068 | 14.6438102 | 1.48E-48  | 1.99E-46  | Bifidobacteriaceae    | EasyDNA vs MagNAPure       |
| 283.625111 | 6.76475532  | 0.54891922 | 12.323772  | 6.75E-35  | 6.44E-33  | Lactobacillaceae      | EasyDNA vs QIAStool        |
| 649.223144 | 4.37138738  | 0.3572889  | 12.2348815 | 2.02E-34  | 3.06E-32  | Bifidobacteriaceae    | EasyDNA vs QIAStool+BB     |
| 458.885072 | 4.53073551  | 0.37259059 | 12.1600912 | 5.07E-34  | 3.23E-32  | Carnobacteriaceae     | EasyDNA vs QIAStool        |
| 649.223144 | 3.79123624  | 0.31179797 | 12.1592717 | 5.12E-34  | 3.66E-32  | Bifidobacteriaceae    | EasyDNA vs FastDNA         |
| 858.112951 | 3.26216457  | 0.29164006 | 11.1855845 | 4.80E-29  | 3.91E-27  | Legionellaceae        | EasyDNA vs PowerSoil.HMP   |
| 283.625111 | 6.53180922  | 0.59946607 | 10.8960449 | 1.20E-27  | 8.13E-26  | Lactobacillaceae      | EasyDNA vs MagNAPure       |
| 858.112951 | 3.3518407   | 0.31881432 | 10.5134571 | 7.49E-26  | 5.65E-24  | Legionellaceae        | EasyDNA vs QIAStool+BB     |
| 858.112951 | -3.2399311  | 0.31273297 | -10.360056 | 3.77E-25  | 4.18E-23  | Legionellaceae        | FastDNA vs MagNAPure       |
| 505.493872 | 3.75708256  | 0.37090716 | 10.129442  | 4.09E-24  | 1.95E-22  | Erysipelotrichaceae   | EasyDNA vs QIAStool        |
| 3668.6678  | 4.98922885  | 0.49392154 | 10.1012579 | 5.45E-24  | 2.45E-22  | Lachnospiraceae       | EasyDNA vs MagNAPure       |
| 458.885072 | 4.14006653  | 0.40630321 | 10.1895985 | 2.21E-24  | 3.16E-22  | Carnobacteriaceae     | FastDNA vs QIAStool        |
| 649.223144 | 3.76051584  | 0.391297   | 9.6103875  | 7.23E-22  | 1.18E-19  | Bifidobacteriaceae    | EasyDNA vs InnuPURE        |
| 103.008126 | 3.06984526  | 0.32848091 | 9.43417169 | 3.94E-21  | 1.51E-19  | Enterococcaceae       | EasyDNA vs QIAStool        |
| 3668.6678  | 4.06945931  | 0.44648024 | 9.11453394 | 7.90E-20  | 2.52E-18  | Lachnospiraceae       | EasyDNA vs QIAStool        |
| 458.885072 | -3.9036097  | 0.42130142 | -9.2655984 | 1.94E-20  | 2.70E-18  | Carnobacteriaceae     | QIAStool vs QIAStool+BB    |
| 505.493872 | 3.74637486  | 0.41138597 | 9.10671522 | 8.49E-20  | 2.87E-18  | Erysipelotrichaceae   | EasyDNA vs MagNAPure       |
| 649.223144 | 3.03411034  | 0.3389894  | 8.9504579  | 3.54E-19  | 2.53E-17  | Bifidobacteriaceae    | FastDNA vs QIAStool        |
| 49.8040986 | 4.33239316  | 0.49224425 | 8.80130772 | 1.35E-18  | 3.69E-17  | Actinomycetaceae      | EasyDNA vs QIAStool        |
| 4234.46977 | 2.87073548  | 0.32448599 | 8.84702452 | 8.99E-19  | 4.28E-17  | Ruminococcaceae       | EasyDNA vs FastDNA         |
| 858.112951 | 2.1585116   | 0.25552818 | 8.44725466 | 2.98E-17  | 7.12E-16  | Legionellaceae        | EasyDNA vs QIAStool        |
| 283.625111 | 5.01823943  | 0.58931798 | 8.51533406 | 1.66E-17  | 9.03E-16  | Lactobacillaceae      | EasyDNA vs PowerSoil.HMP   |
| 2750.67146 | 3.61050489  | 0.43024624 | 8.39171743 | 4.79E-17  | 1.29E-15  | Bacteroidaceae        | EasyDNA vs MagNAPure       |
| 4234.46977 | 2.65205125  | 0.32465158 | 8.16891528 | 3.11E-16  | 7.00E-15  | Ruminococcaceae       | EasyDNA vs MagNAPure       |
| 458.885072 | 4.13915825  | 0.49523734 | 8.35792836 | 6.38E-17  | 8.87E-15  | Carnobacteriaceae     | InnuPURE vs QIAStool       |
| 858.112951 | -2.3642804  | 0.2878549  | -8.213445  | 2.15E-16  | 1.02E-14  | Legionellaceae        | FastDNA vs QIAStool        |
| 719.094782 | 2.76017849  | 0.34134669 | 8.08614399 | 6.16E-16  | 2.51E-14  | Streptococcaceae      | EasyDNA vs PowerSoil.HMP   |
| 719.094782 | 2.39430118  | 0.30288969 | 7.90486188 | 2.68E-15  | 5.69E-14  | Streptococcaceae      | EasyDNA vs QIAStool        |
| 103.008126 | 2.8436344   | 0.36066035 | 7.88452173 | 3.16E-15  | 6.09E-14  | Enterococcaceae       | EasyDNA vs MagNAPure       |
| 103.008126 | 3.01172614  | 0.38076559 | 7.90965945 | 2.58E-15  | 8.41E-14  | Enterococcaceae       | EasyDNA vs PowerSoil.HMP   |
| 505.493872 | 3.18511617  | 0.40804762 | 7.80574613 | 5.92E-15  | 1.71E-13  | Erysipelotrichaceae   | EasyDNA vs FastDNA         |
| 3668.6678  | 3.84726205  | 0.49296566 | 7.80432056 | 5.98E-15  | 1.71E-13  | Lachnospiraceae       | EasyDNA vs FastDNA         |
| 33.4444509 | 4.99601637  | 0.68201466 | 7.32537975 | 2.38E-13  | 4.55E-12  | Coriobacteriaceae     | EasyDNA vs QIAStool        |
| 118.339928 | -2.2031982  | 0.29992413 | -7.3458517 | 2.04E-13  | 7.31E-12  | [Chthoniobacteraceae] | FastDNA vs QIAStool        |
| 649.223144 | 3.06483074  | 0.41298549 | 7.42115838 | 1.16E-13  | 8.07E-12  | Bifidobacteriaceae    | InnuPURE vs QIAStool       |
| 49.8040986 | 3.68571012  | 0.5128394  | 7.18687007 | 6.63E-13  | 1.90E-11  | Actinomycetaceae      | FastDNA vs QIAStool        |
| 3668.6678  | 3.52725908  | 0.49371146 | 7.14437356 | 9.04E-13  | 2.15E-11  | Lachnospiraceae       | EasyDNA vs PowerSoil.HMP   |
| 505.493872 | 2.94927376  | 0.41296872 | 7.14163966 | 9.22E-13  | 2.15E-11  | Erysipelotrichaceae   | EasyDNA vs PowerSoil.HMP   |
| 186.231671 | -2.2374803  | 0.31528142 | -7.0967719 | 1.28E-12  | 8.88E-11  | Rhizobiaceae          | QIAStool vs QIAStool+BB    |
| 719.094782 | 2.55887653  | 0.36330665 | 7.04329673 | 1.88E-12  | 9.45E-11  | Streptococcaceae      | EasyDNA vs QIAStool+BB     |
| 858.112951 | 2.49333772  | 0.35533582 | 7.0168488  | 2.27E-12  | 1.85E-10  | Legionellaceae        | EasyDNA vs InnuPURE        |
| 3668.6678  | 3.35179711  | 0.49869049 | 6.72119718 | 1.80E-11  | 6.80E-10  | Lachnospiraceae       | EasyDNA vs QIAStool+BB     |
| 4234.46977 | 2.19156111  | 0.32972499 | 6.64663329 | 3.00E-11  | 9.06E-10  | Ruminococcaceae       | EasyDNA vs QIAStool+BB     |
| 993.963868 | -2.9717971  | 0.45776516 | -6.4919687 | 8.47E-11  | 1.47E-09  | Opiritaceae           | EasyDNA vs QIAStool        |
| 505.493872 | 3.34829908  | 0.50439697 | 6.63822198 | 3.17E-11  | 1.73E-09  | Erysipelotrichaceae   | EasyDNA vs InnuPURE        |
| 49.8040986 | 3.93076665  | 0.601821   | 6.53145479 | 6.51E-11  | 3.02E-09  | Actinomycetaceae      | InnuPURE vs QIAStool       |
| 4234.46977 | 1.84495753  | 0.29167984 | 6.32528303 | 2.53E-10  | 4.02E-09  | Ruminococcaceae       | EasyDNA vs QIAStool        |
| 649.223144 | -2.4539592  | 0.3810699  | -6.4396564 | 1.20E-10  | 5.55E-09  | Bifidobacteriaceae    | QIAStool vs QIAStool+BB    |
| 505.493872 | 2.75232367  | 0.43583608 | 6.31504315 | 2.70E-10  | 6.80E-09  | Erysipelotrichaceae   | EasyDNA vs QIAStool+BB     |
| 458.885072 | 2.49945084  | 0.40038248 | 6.24265787 | 4.30E-10  | 7.26E-09  | Carnobacteriaceae     | EasyDNA vs MagNAPure       |
| 458.885072 | 2.52065316  | 0.40591353 | 6.20982789 | 5.30E-10  | 1.02E-08  | Carnobacteriaceae     | EasyDNA vs PowerSoil.HMP   |
| 47.9856545 | -3.2556254  | 0.52513758 | -6.1995666 | 5.66E-10  | 1.02E-08  | Bacteriovoracaceae    | EasyDNA vs PowerSoil.HMP   |
| 49.8040986 | 3.25085928  | 0.52651405 | 6.17430685 | 6.65E-10  | 1.02E-08  | Actinomycetaceae      | EasyDNA vs PowerSoil.HMP   |
| 33.4444509 | 4.67402796  | 0.75777778 | 6.16807211 | 6.91E-10  | 1.02E-08  | Coriobacteriaceae     | EasyDNA vs PowerSoil.HMP   |
| 858.112951 | -1.9793037  | 0.31561673 | -6.2712254 | 3.58E-10  | 2.50E-08  | Legionellaceae        | PowerSoil.HMP vs MagNAPure |
| 622.632062 | -2.1934305  | 0.35305951 | -6.2126369 | 5.21E-10  | 2.50E-08  | Flavobacteriaceae     | PowerSoil.HMP vs MagNAPure |
| 283.625111 | 3.63327256  | 0.59610996 | 6.09497039 | 1.09E-09  | 2.61E-08  | Lactobacillaceae      | FastDNA vs QIAStool        |
| 141.200238 | -2.2467743  | 0.37457141 | -5.9982536 | 1.99E-09  | 2.71E-08  | Chitinophagaceae      | EasyDNA vs PowerSoil.HMP   |
| 649.223144 | -2.1681657  | 0.3447053  | -6.2899111 | 3.18E-10  | 6.58E-08  | Bifidobacteriaceae    | QIAStool vs MagNAPure      |
| 616.023371 | 2.17009588  | 0.37325392 | 5.8139935  | 6.10E-09  | 9.15E-08  | Veillonellaceae       | EasyDNA vs MagNAPure       |

bioRxiv preprint doi: <https://doi.org/10.1101/064394>; this version posted July 18, 2016. The copyright holder for this preprint (which was not certified by peer review) is the author/funder, who has granted bioRxiv a license to display the preprint in perpetuity. It is made available under aCC-BY 4.0 International license.

|            |            |            |            |          |          |                       |                            |
|------------|------------|------------|------------|----------|----------|-----------------------|----------------------------|
| 103.008126 | 2.0301104  | 0.34927259 | 5.81239536 | 6.16E-09 | 1.26E-07 | Enterococcaceae       | FastDNA vs QIAStool        |
| 858.112951 | -2.0689798 | 0.34079652 | -6.0710121 | 1.27E-09 | 1.31E-07 | Legionellaceae        | QIAStool+BB vs MagNAPure   |
| 141.200238 | -2.3121306 | 0.39864712 | -5.7999431 | 6.63E-09 | 1.43E-07 | Chitinophagaceae      | EasyDNA vs QIAStool+BB     |
| 2750.67146 | 2.58911904 | 0.42988976 | 6.02275112 | 1.71E-09 | 1.77E-07 | Bacteroidaceae        | QIAStool vs MagNAPure      |
| 579.211848 | -1.7141861 | 0.29702596 | -5.771166  | 7.87E-09 | 1.88E-07 | Cryomorphaceae        | EasyDNA vs FastDNA         |
| 622.632062 | -1.8973044 | 0.31931391 | -5.9418158 | 2.82E-09 | 1.94E-07 | Flavobacteriaceae     | QIAStool vs MagNAPure      |
| 283.625111 | -3.671693  | 0.63002671 | -5.8278371 | 5.62E-09 | 1.95E-07 | Lactobacillaceae      | QIAStool vs QIAStool+BB    |
| 118.339928 | 1.81003807 | 0.31730854 | 5.70434721 | 1.17E-08 | 2.39E-07 | [Chthoniobacteraceae] | EasyDNA vs FastDNA         |
| 639.445335 | -1.9434602 | 0.3470908  | -5.5992847 | 2.15E-08 | 2.70E-07 | Marinilabiaceae       | EasyDNA vs PowerSoil.HMP   |
| 47.9856545 | -2.7589818 | 0.49172905 | -5.6107766 | 2.01E-08 | 2.96E-07 | Bacteriovoraceae      | EasyDNA vs QIAStool        |
| 50.9419349 | -3.1533338 | 0.56681969 | -5.5632045 | 2.65E-08 | 3.08E-07 | Desulfobulbaceae      | EasyDNA vs PowerSoil.HMP   |
| 4234.46977 | 1.80165225 | 0.3248057  | 5.54686163 | 2.91E-08 | 3.16E-07 | Ruminococcaceae       | EasyDNA vs PowerSoil.HMP   |
| 169.692077 | -2.5020001 | 0.43818754 | -5.7098842 | 1.13E-08 | 3.62E-07 | Pirellulaceae         | PowerSoil.HMP vs MagNAPure |
| 283.625111 | 3.13148276 | 0.56384853 | 5.55376592 | 2.80E-08 | 5.00E-07 | Lactobacillaceae      | EasyDNA vs FastDNA         |
| 639.445335 | -1.9819676 | 0.35653587 | -5.558957  | 2.71E-08 | 5.12E-07 | Marinilabiaceae       | EasyDNA vs QIAStool+BB     |
| 47.9856545 | -2.8371254 | 0.51608043 | -5.4974481 | 3.85E-08 | 6.12E-07 | Bacteriovoraceae      | EasyDNA vs FastDNA         |
| 186.231671 | -1.6588195 | 0.29104376 | -5.6995534 | 1.20E-08 | 6.22E-07 | Rhizobiaceae          | QIAStool vs MagNAPure      |
| 49.8040986 | 2.6607802  | 0.48751569 | 5.45783502 | 4.82E-08 | 6.51E-07 | Actinomycetaceae      | EasyDNA vs MagNAPure       |
| 141.200238 | -2.0144185 | 0.3687622  | -5.4626491 | 4.69E-08 | 6.71E-07 | Chitinophagaceae      | EasyDNA vs FastDNA         |
| 33.4444509 | 3.7400853  | 0.68725107 | 5.44209458 | 5.27E-08 | 6.85E-07 | Coriobacteriaceae     | EasyDNA vs FastDNA         |
| 4234.46977 | 2.2738468  | 0.40301486 | 5.64209171 | 1.68E-08 | 6.85E-07 | Ruminococcaceae       | EasyDNA vs InnuPURE        |
| 50.9419349 | -2.9788598 | 0.55810891 | -5.3374166 | 9.43E-08 | 1.12E-06 | Desulfobulbaceae      | EasyDNA vs FastDNA         |
| 224.417038 | -2.2900472 | 0.43302783 | -5.2884528 | 1.23E-07 | 1.26E-06 | Caulobacteraceae      | EasyDNA vs PowerSoil.HMP   |
| 579.211848 | -1.5784754 | 0.29952912 | -5.2698562 | 1.37E-07 | 1.31E-06 | Cryomorphaceae        | EasyDNA vs PowerSoil.HMP   |
| 60.913589  | 1.80194128 | 0.33612104 | 5.36098928 | 8.28E-08 | 1.48E-06 | SB-1                  | FastDNA vs QIAStool        |
| 50.9419349 | -3.4975916 | 0.64107451 | -5.455827  | 4.87E-08 | 1.59E-06 | Desulfobulbaceae      | EasyDNA vs InnuPURE        |
| 264.350163 | 1.67550628 | 0.29505857 | 5.67855486 | 1.36E-08 | 1.73E-06 | Leptotrichiaceae      | PowerSoil.HMP vs QIAStool  |
| 24.9235631 | -2.9250852 | 0.56407379 | -5.1856428 | 2.15E-07 | 1.95E-06 | [Bryobacteraceae]     | EasyDNA vs PowerSoil.HMP   |
| 2750.67146 | 2.31054863 | 0.43619881 | 5.29700806 | 1.18E-07 | 1.98E-06 | Bacteroidaceae        | EasyDNA vs QIAStool+BB     |
| 50.9419349 | -2.9345835 | 0.56106287 | -5.2304005 | 1.69E-07 | 2.08E-06 | Desulfobulbaceae      | EasyDNA vs MagNAPure       |
| 2750.67146 | 2.23082024 | 0.42928279 | 5.1966217  | 2.03E-07 | 2.23E-06 | Bacteroidaceae        | EasyDNA vs FastDNA         |
| 164.684355 | 2.43591952 | 0.46885051 | 5.19551427 | 2.04E-07 | 2.30E-06 | Clostridiaceae        | EasyDNA vs MagNAPure       |
| 616.023371 | 1.91438373 | 0.37167225 | 5.15073087 | 2.59E-07 | 2.65E-06 | Veillonellaceae       | EasyDNA vs FastDNA         |
| 579.211848 | -1.5289396 | 0.29774329 | -5.1350935 | 2.82E-07 | 2.93E-06 | Cryomorphaceae        | EasyDNA vs MagNAPure       |
| 264.350163 | -1.5725743 | 0.29211855 | -5.3833429 | 7.31E-08 | 3.03E-06 | Leptotrichiaceae      | QIAStool vs MagNAPure      |
| 47.9856545 | -2.8959851 | 0.56014488 | -5.1700644 | 2.34E-07 | 3.48E-06 | Bacteriovoraceae      | EasyDNA vs QIAStool+BB     |
| 283.625111 | 3.09306229 | 0.60001044 | 5.15501411 | 2.54E-07 | 3.48E-06 | Lactobacillaceae      | EasyDNA vs QIAStool+BB     |
| 104.663517 | 2.01013043 | 0.39723097 | 5.06035681 | 4.18E-07 | 4.04E-06 | Rikenellaceae         | EasyDNA vs MagNAPure       |
| 719.094782 | 2.18960446 | 0.41686817 | 5.2525105  | 1.50E-07 | 4.08E-06 | Streptococcaceae      | QIAStool vs InnuPURE       |
| 49.8040986 | -2.9975018 | 0.57075775 | -5.2517935 | 1.51E-07 | 4.19E-06 | Actinomycetaceae      | QIAStool vs QIAStool+BB    |
| 28.0267224 | 3.26712548 | 0.65449599 | 4.99181896 | 5.98E-07 | 5.38E-06 | Succinivibrionaceae   | EasyDNA vs MagNAPure       |
| 3668.6678  | 3.086453   | 0.5976439  | 5.16436792 | 2.41E-07 | 5.62E-06 | Lachnospiraceae       | EasyDNA vs InnuPURE        |
| 22.1599751 | 3.76303745 | 0.74421723 | 5.05636971 | 4.27E-07 | 5.83E-06 | Sanguibacteraceae     | EasyDNA vs QIAStool        |
| 283.625111 | 3.40032645 | 0.64218587 | 5.29492571 | 1.19E-07 | 6.61E-06 | Lactobacillaceae      | FastDNA vs MagNAPure       |
| 186.231671 | 1.46311188 | 0.28954379 | 5.05316272 | 4.35E-07 | 6.90E-06 | Rhizobiaceae          | FastDNA vs QIAStool        |
| 131.739477 | -1.6538134 | 0.33613801 | -4.9200427 | 8.65E-07 | 7.30E-06 | Hyphomicrobiaceae     | EasyDNA vs MagNAPure       |
| 719.094782 | 1.64683881 | 0.33485216 | 4.91810712 | 8.74E-07 | 8.33E-06 | Streptococcaceae      | EasyDNA vs FastDNA         |
| 639.445335 | -1.6956173 | 0.34566547 | -4.9053709 | 9.33E-07 | 8.33E-06 | Marinilabiaceae       | EasyDNA vs FastDNA         |
| 7.94601326 | 4.25743862 | 0.86954011 | 4.8961958  | 9.77E-07 | 1.24E-05 | Micrococcaceae        | EasyDNA vs QIAStool        |
| 354.810526 | -1.2016891 | 0.25020884 | -4.8027444 | 1.57E-06 | 1.25E-05 | Pseudomonadaceae      | EasyDNA vs FastDNA         |
| 20.5932418 | 3.40730412 | 0.70969866 | 4.80105753 | 1.58E-06 | 1.25E-05 | [Mogibacteriaceae]    | EasyDNA vs FastDNA         |
| 47.9856545 | -2.9519041 | 0.59210402 | -4.9854486 | 6.18E-07 | 1.26E-05 | Bacteriovoraceae      | EasyDNA vs InnuPURE        |
| 33.4444509 | 3.30560527 | 0.69235087 | 4.77446541 | 1.80E-06 | 1.43E-05 | Coriobacteriaceae     | EasyDNA vs MagNAPure       |
| 31.145957  | 4.67590454 | 0.90414752 | 5.17161683 | 2.32E-07 | 1.47E-05 | Aerococcaceae         | PowerSoil.HMP vs QIAStool  |
| 1110.97909 | -0.8552071 | 0.17647177 | -4.8461411 | 1.26E-06 | 1.50E-05 | Verrucomicrobiaceae   | EasyDNA vs QIAStool        |
| 33.4444509 | 3.74329586 | 0.7734292  | 4.83986884 | 1.30E-06 | 1.63E-05 | Coriobacteriaceae     | EasyDNA vs QIAStool+BB     |
| 283.625111 | 3.43874693 | 0.67321308 | 5.10796215 | 3.26E-07 | 1.68E-05 | Lactobacillaceae      | QIAStool+BB vs MagNAPure   |
| 616.023371 | 2.26022292 | 0.4609869  | 4.90300899 | 9.44E-07 | 1.71E-05 | Veillonellaceae       | EasyDNA vs InnuPURE        |
| 92.6279814 | 2.25174145 | 0.47401585 | 4.75035053 | 2.03E-06 | 1.74E-05 | Oxalobacteraceae      | EasyDNA vs PowerSoil.HMP   |
| 858.112951 | -2.0294542 | 0.37889716 | -5.356214  | 8.50E-08 | 1.76E-05 | Legionellaceae        | FastDNA vs InnuPURE        |
| 44.0121162 | -2.6519931 | 0.53414421 | -4.9649384 | 6.87E-07 | 1.84E-05 | Microbacteriaceae     | QIAStool vs MagNAPure      |
| 458.885072 | -2.0312847 | 0.410162   | -4.9523961 | 7.33E-07 | 1.84E-05 | Carnobacteriaceae     | QIAStool vs MagNAPure      |
| 28.0267224 | 3.13232418 | 0.63285923 | 4.9494801  | 7.44E-07 | 1.84E-05 | Succinivibrionaceae   | QIAStool vs MagNAPure      |
| 104.663517 | 1.89306701 | 0.38356181 | 4.93549398 | 7.99E-07 | 1.84E-05 | Rikenellaceae         | QIAStool vs MagNAPure      |
| 283.625111 | 3.52238694 | 0.70298392 | 5.01062233 | 5.43E-07 | 1.89E-05 | Lactobacillaceae      | InnuPURE vs QIAStool       |

bioRxiv preprint doi: <https://doi.org/10.1101/064394>; this version posted July 18, 2016. The copyright holder for this preprint (which was not certified by peer review) is the author/funder, who has granted bioRxiv a license to display the preprint in perpetuity. It is made available under aCC-BY 4.0 International license.

|            |            |            |            |          |            |                      |                            |
|------------|------------|------------|------------|----------|------------|----------------------|----------------------------|
| 993.963868 | 2.43312399 | 0.49693261 | 4.89628565 | 9.77E-07 | 2.02E-05   | Opitutaceae          | QIAStool vs MagNAPure      |
| 224.417038 | -2.0089553 | 0.43129404 | -4.6579715 | 3.19E-06 | 2.40E-05   | Caulobacteraceae     | EasyDNA vs MagNAPure       |
| 2750.67146 | 2.5329193  | 0.52617828 | 4.81380436 | 1.48E-06 | 2.41E-05   | Bacteroidaceae       | EasyDNA vs InnuPURE        |
| 283.625111 | 3.24236838 | 0.67710254 | 4.78859282 | 1.68E-06 | 2.49E-05   | Lactobacillaceae     | EasyDNA vs InnuPURE        |
| 579.211848 | -1.7395483 | 0.3646933  | -4.7698939 | 1.84E-06 | 2.50E-05   | Cryomorpaceae        | EasyDNA vs InnuPURE        |
| 616.023371 | 1.78559065 | 0.37061859 | 4.81786587 | 1.45E-06 | 2.73E-05   | Veillonellaceae      | QIAStool vs MagNAPure      |
| 127.559639 | -1.7610135 | 0.38087354 | -4.6236173 | 3.77E-06 | 3.07E-05   | Bradyrhizobiaceae    | EasyDNA vs PowerSoil.HMP   |
| 354.810526 | -1.1755292 | 0.25502204 | -4.6095201 | 4.04E-06 | 3.13E-05   | Pseudomonadaceae     | EasyDNA vs PowerSoil.HMP   |
| 1110.97909 | 1.00356055 | 0.20789468 | 4.82725467 | 1.38E-06 | 3.21E-05   | Verrucomicrobiaceae  | QIAStool vs QIAStool+BB    |
| 458.885072 | 2.12998418 | 0.43685713 | 4.8756997  | 1.08E-06 | 3.63E-05   | Carnobacteriaceae    | FastDNA vs PowerSoil.HMP   |
| 103.008126 | 1.94289127 | 0.39867209 | 4.87340682 | 1.10E-06 | 3.63E-05   | Enterococcaceae      | FastDNA vs PowerSoil.HMP   |
| 649.223144 | 1.74844843 | 0.36606848 | 4.77628779 | 1.79E-06 | 3.63E-05   | Bifidobacteriaceae   | FastDNA vs PowerSoil.HMP   |
| 49.8040986 | 2.60417624 | 0.54562554 | 4.77282692 | 1.82E-06 | 3.63E-05   | Actinomycetaceae     | FastDNA vs PowerSoil.HMP   |
| 4830.98886 | 1.39637929 | 0.30634779 | 4.55815037 | 5.16E-06 | 3.82E-05   | Moraxellaceae        | EasyDNA vs PowerSoil.HMP   |
| 458.885072 | 2.10878186 | 0.43175866 | 4.8841681  | 1.04E-06 | 3.84E-05   | Carnobacteriaceae    | FastDNA vs MagNAPure       |
| 186.231671 | 1.44657273 | 0.29780928 | 4.8573796  | 1.19E-06 | 4.18E-05   | Rhizobiaceae         | PowerSoil.HMP vs QIAStool  |
| 458.885072 | 2.01008235 | 0.41555158 | 4.83714281 | 1.32E-06 | 4.18E-05   | Carnobacteriaceae    | PowerSoil.HMP vs QIAStool  |
| 127.559639 | 1.70915508 | 0.35669596 | 4.79163005 | 1.65E-06 | 4.20E-05   | Bradyrhizobiaceae    | PowerSoil.HMP vs QIAStool  |
| 858.112951 | 1.28286089 | 0.28337494 | 4.5270795  | 5.98E-06 | 4.25E-05   | Legionellaceae       | EasyDNA vs MagNAPure       |
| 113.494552 | 1.61419048 | 0.36198295 | 4.45929977 | 8.22E-06 | 5.55E-05   | Alcaligenaceae       | EasyDNA vs MagNAPure       |
| 2750.67146 | 1.91527189 | 0.42988963 | 4.45526421 | 8.38E-06 | 5.94E-05   | Bacteroidaceae       | EasyDNA vs PowerSoil.HMP   |
| 103.008126 | 1.77479953 | 0.37958812 | 4.67559296 | 2.93E-06 | 6.60E-05   | Enterococcaceae      | FastDNA vs MagNAPure       |
| 21.4381793 | 4.3110629  | 0.92258237 | 4.67282169 | 2.97E-06 | 6.60E-05   | Turicibacteraceae    | FastDNA vs MagNAPure       |
| 186.231671 | -1.4894853 | 0.32863304 | -4.5323662 | 5.83E-06 | 6.77E-05   | Rhizobiaceae         | EasyDNA vs QIAStool+BB     |
| 719.094782 | 1.45997524 | 0.33529292 | 4.35432771 | 1.33E-05 | 8.58E-05   | Streptococcaceae     | EasyDNA vs MagNAPure       |
| 24.9235631 | -2.4240291 | 0.5584747  | -4.3404456 | 1.42E-05 | 8.73E-05   | [Bryobacteraceae]    | EasyDNA vs MagNAPure       |
| 141.200238 | -1.9858992 | 0.44217029 | -4.4912543 | 7.08E-06 | 8.88E-05   | Chitinophagaceae     | EasyDNA vs InnuPURE        |
| 60.913589  | -1.5556429 | 0.34130474 | -4.5579295 | 5.17E-06 | 8.91E-05   | SB-1                 | QIAStool vs MagNAPure      |
| 21.4381793 | 3.83550551 | 0.84989348 | 4.51292495 | 6.39E-06 | 9.14E-05   | Turicibacteraceae    | FastDNA vs QIAStool        |
| 47.9856545 | -2.257859  | 0.52469926 | -4.3031488 | 1.68E-05 | 9.88E-05   | Bacteriovoracaceae   | EasyDNA vs MagNAPure       |
| 129.664767 | -1.7354308 | 0.40486896 | -4.2864011 | 1.82E-05 | 0.00010214 | Sphingomonadaceae    | EasyDNA vs MagNAPure       |
| 186.231671 | 1.65979847 | 0.36004846 | 4.60993081 | 4.03E-06 | 0.00010414 | Rhizobiaceae         | InnuPURE vs QIAStool       |
| 7.94601326 | 4.39122021 | 0.9573039  | 4.5870702  | 4.50E-06 | 0.00010414 | Micrococcaceae       | InnuPURE vs QIAStool       |
| 103.008126 | 1.74349936 | 0.39463833 | 4.41796766 | 9.96E-06 | 0.00010746 | Enterococcaceae      | EasyDNA vs QIAStool+BB     |
| 24.9235631 | -2.6423032 | 0.60049176 | -4.4002323 | 1.08E-05 | 0.00010886 | [Bryobacteraceae]    | EasyDNA vs QIAStool+BB     |
| 639.445335 | -1.4715753 | 0.34627638 | -4.2497132 | 2.14E-05 | 0.00011558 | Marinilabiaceae      | EasyDNA vs MagNAPure       |
| 59.9667273 | 1.93226679 | 0.42523105 | 4.54403979 | 5.52E-06 | 0.00011681 | Phyllobacteriaceae   | PowerSoil.HMP vs QIAStool  |
| 21.4381793 | 4.27081182 | 0.9437759  | 4.52523934 | 6.03E-06 | 0.00011979 | Turicibacteraceae    | InnuPURE vs QIAStool       |
| 622.632062 | -1.3757081 | 0.32541716 | -4.2275217 | 2.36E-05 | 0.00012268 | Flavobacteriaceae    | EasyDNA vs MagNAPure       |
| 79.5100271 | -1.7761899 | 0.42104528 | -4.2185246 | 2.46E-05 | 0.00012295 | Bdellovibrionaceae   | EasyDNA vs MagNAPure       |
| 616.023371 | 1.72314588 | 0.3956667  | 4.35504397 | 1.33E-05 | 0.00012556 | Veillonellaceae      | EasyDNA vs QIAStool+BB     |
| 269.467613 | 3.83469555 | 0.91517191 | 4.19013688 | 2.79E-05 | 0.00013441 | [Paraprevotellaceae] | EasyDNA vs MagNAPure       |
| 224.417038 | -1.9574683 | 0.45287758 | -4.3222901 | 1.54E-05 | 0.00013716 | Caulobacteraceae     | EasyDNA vs QIAStool+BB     |
| 622.632062 | 1.57003075 | 0.35300582 | 4.44760591 | 8.68E-06 | 0.00013893 | Flavobacteriaceae    | FastDNA vs PowerSoil.HMP   |
| 579.211848 | -1.3487004 | 0.31530459 | -4.2774525 | 1.89E-05 | 0.00015859 | Cryomorpaceae        | EasyDNA vs QIAStool+BB     |
| 17.3475351 | -3.0168408 | 0.68543834 | -4.4013307 | 1.08E-05 | 0.00017131 | Isosphaeraceae       | QIAStool vs MagNAPure      |
| 642.395629 | -1.4644737 | 0.33909709 | -4.3187444 | 1.57E-05 | 0.0001763  | Rhodocyclaceae       | EasyDNA vs QIAStool        |
| 21.4381793 | 4.36627385 | 0.95987712 | 4.54878417 | 5.40E-06 | 0.00018525 | Turicibacteraceae    | QIAStool+BB vs MagNAPure   |
| 736.495903 | -3.1494341 | 0.72564066 | -4.3402117 | 1.42E-05 | 0.00018979 | Enterobacteriaceae   | FastDNA vs PowerSoil.HMP   |
| 354.810526 | -0.9826337 | 0.22992472 | -4.273719  | 1.92E-05 | 0.00020399 | Pseudomonadaceae     | EasyDNA vs QIAStool        |
| 310.195483 | -1.5002553 | 0.3530494  | -4.2494202 | 2.14E-05 | 0.00021545 | Aeromonadaceae       | EasyDNA vs QIAStool        |
| 127.559639 | -1.5335396 | 0.37748821 | -4.0624835 | 4.86E-05 | 0.00022602 | Bradyrhizobiaceae    | EasyDNA vs MagNAPure       |
| 736.495903 | 3.2147007  | 0.72609436 | 4.42738697 | 9.54E-06 | 0.00022892 | Enterobacteriaceae   | PowerSoil.HMP vs MagNAPure |
| 21.4381793 | 3.65889131 | 0.90779156 | 4.03054124 | 5.56E-05 | 0.00025042 | Turicibacteraceae    | EasyDNA vs MagNAPure       |
| 22.1599751 | 3.8088383  | 0.87850368 | 4.33559743 | 1.45E-05 | 0.00025257 | Sanguibacteraceae    | InnuPURE vs QIAStool       |
| 28.7248963 | -2.4613767 | 0.5983952  | -4.1132963 | 3.90E-05 | 0.0002592  | Acetobacteraceae     | EasyDNA vs PowerSoil.HMP   |
| 20.5932418 | 3.06459248 | 0.74584242 | 4.10890073 | 3.98E-05 | 0.0002592  | [Mogibacteriaceae]   | EasyDNA vs PowerSoil.HMP   |
| 21.4381793 | -3.8907165 | 0.8934125  | -4.3548937 | 1.33E-05 | 0.00026436 | Turicibacteraceae    | QIAStool vs QIAStool+BB    |
| 20.5932418 | 2.73509037 | 0.65453561 | 4.17867316 | 2.93E-05 | 0.00028002 | [Mogibacteriaceae]   | EasyDNA vs QIAStool        |
| 169.692077 | -1.6566863 | 0.38767879 | -4.2733476 | 1.93E-05 | 0.00028471 | Pirellulaceae        | QIAStool vs MagNAPure      |
| 19.2945448 | -2.3378592 | 0.57446007 | -4.0696636 | 4.71E-05 | 0.00029516 | BA008                | EasyDNA vs PowerSoil.HMP   |
| 59.9667273 | -1.9028345 | 0.45384514 | -4.1926957 | 2.76E-05 | 0.00031504 | Phyllobacteriaceae   | FastDNA vs PowerSoil.HMP   |
| 24.9235631 | 2.00013401 | 0.46676422 | 4.28510563 | 1.83E-05 | 0.00033138 | [Bryobacteraceae]    | PowerSoil.HMP vs QIAStool  |
| 118.159531 | -1.6325049 | 0.41315264 | -3.9513361 | 7.77E-05 | 0.00033844 | Rhodobacteraceae     | EasyDNA vs MagNAPure       |
| 31.145957  | 4.3064622  | 0.94315101 | 4.27976235 | 1.87E-05 | 0.00035922 | Aerococcaceae        | PowerSoil.HMP vs MagNAPure |



bioRxiv preprint doi: <https://doi.org/10.1101/064394>; this version posted July 18, 2016. The copyright holder for this preprint (which was not certified by peer review) is the author/funder, who has granted bioRxiv a license to display the preprint in perpetuity. It is made available under aCC-BY 4.0 International license.

|            |            |            |            |            |            |                       |                            |
|------------|------------|------------|------------|------------|------------|-----------------------|----------------------------|
| 127.559639 | -1.4816812 | 0.35306201 | -4.19666   | 2.71E-05   | 0.00036159 | Bradyrhizobiaceae     | QIAStool vs MagNAPure      |
| 118.339928 | 1.24831573 | 0.29795829 | 4.18956536 | 2.79E-05   | 0.00036159 | [Chthoniobacteraceae] | QIAStool vs MagNAPure      |
| 59.9667273 | -1.8333257 | 0.46049263 | -3.981227  | 6.86E-05   | 0.0004139  | Phyllobacteriaceae    | EasyDNA vs PowerSoil.HMP   |
| 639.445335 | 1.40828004 | 0.33538657 | 4.19897568 | 2.68E-05   | 0.00042565 | Marinilabiaceae       | PowerSoil.HMP vs QIAStool  |
| 79.5100271 | -1.6859989 | 0.41893896 | -4.0244501 | 5.71E-05   | 0.00042982 | Bdellovibrionaceae    | EasyDNA vs FastDNA         |
| 24.9235631 | -2.221681  | 0.55402879 | -4.0100462 | 6.07E-05   | 0.00043405 | [Bryobacteraceae]     | EasyDNA vs FastDNA         |
| 118.339928 | -1.589293  | 0.37966561 | -4.1860337 | 2.84E-05   | 0.00043842 | [Chthoniobacteraceae] | InnuPURE vs QIAStool       |
| 616.023371 | -1.5298785 | 0.3690248  | -4.1457335 | 3.39E-05   | 0.00044035 | Veillonellaceae       | FastDNA vs QIAStool        |
| 6.92597984 | -3.2118216 | 0.79077444 | -4.0616154 | 4.87E-05   | 0.00044325 | [Chromatiaceae]       | EasyDNA vs QIAStool        |
| 354.810526 | -1.2624747 | 0.30675563 | -4.1155713 | 3.86E-05   | 0.00044967 | Pseudomonadaceae      | EasyDNA vs InnuPURE        |
| 21.4381793 | 4.74636921 | 1.00321669 | 4.73115056 | 2.23E-06   | 0.00046213 | Turicibacteraceae     | InnuPURE vs MagNAPure      |
| 639.445335 | -1.4467874 | 0.34517174 | -4.1915002 | 2.77E-05   | 0.00048149 | Marinilabiaceae       | QIAStool vs QIAStool+BB    |
| 17.3475351 | -3.0488699 | 0.72528896 | -4.2036624 | 2.63E-05   | 0.00048587 | Isosphaeraceae        | FastDNA vs MagNAPure       |
| 91.6048239 | -1.2060837 | 0.30202592 | -3.9933119 | 6.52E-05   | 0.00053723 | Halomonadaceae        | EasyDNA vs QIAStool        |
| 50.9419349 | -2.1166588 | 0.53101195 | -3.986085  | 6.72E-05   | 0.00053723 | Desulfobulbaceae      | EasyDNA vs QIAStool        |
| 141.200238 | -1.3720459 | 0.34431013 | -3.9849128 | 6.75E-05   | 0.00053723 | Chitinophagaceae      | EasyDNA vs QIAStool        |
| 70.3986464 | 1.43164248 | 0.37367651 | 3.83123484 | 0.0001275  | 0.0005379  | Desulfovibrionaceae   | EasyDNA vs MagNAPure       |
| 103.008126 | 1.77265924 | 0.43241403 | 4.0994489  | 4.14E-05   | 0.00055112 | Enterococcaceae       | InnuPURE vs QIAStool       |
| 616.023371 | -1.8757177 | 0.45889686 | -4.0874494 | 4.36E-05   | 0.00055112 | Veillonellaceae       | InnuPURE vs QIAStool       |
| 11.2601759 | 3.51749155 | 0.88819118 | 3.9602865  | 7.49E-05   | 0.00057193 | Peptococcaceae        | EasyDNA vs QIAStool        |
| 310.195483 | -1.5679178 | 0.3821482  | -4.1029052 | 4.08E-05   | 0.00057573 | Aeromonadaceae        | PowerSoil.HMP vs QIAStool  |
| 50.9419349 | -2.4153589 | 0.61074665 | -3.9547641 | 7.66E-05   | 0.00060885 | Desulfobulbaceae      | EasyDNA vs QIAStool+BB     |
| 118.339928 | 1.41559349 | 0.34454956 | 4.10853378 | 3.98E-05   | 0.00061497 | [Chthoniobacteraceae] | QIAStool vs QIAStool+BB    |
| 182.91656  | -1.4289407 | 0.34903446 | -4.0939816 | 4.24E-05   | 0.00067844 | Planctomycetaceae     | PowerSoil.HMP vs MagNAPure |
| 458.885072 | 1.87232506 | 0.44582209 | 4.19971356 | 2.67E-05   | 0.00068818 | Carnobacteriaceae     | QIAStool+BB vs MagNAPure   |
| 593.953594 | -0.8557847 | 0.22798878 | -3.7536264 | 0.00017429 | 0.00071302 | Cytophagaceae         | EasyDNA vs MagNAPure       |
| 622.632062 | 1.27390462 | 0.3192542  | 3.99025176 | 6.60E-05   | 0.00073743 | Flavobacteriaceae     | FastDNA vs QIAStool        |
| 12.2684488 | -2.4781182 | 0.62161852 | -3.9865578 | 6.70E-05   | 0.00073743 | Synergistaceae        | FastDNA vs QIAStool        |
| 164.684355 | 1.63111762 | 0.42086767 | 3.87560684 | 0.00010636 | 0.00078133 | Clostridiaceae        | EasyDNA vs QIAStool        |
| 17.3475351 | -2.7235825 | 0.73173203 | -3.7221038 | 0.00019757 | 0.00078447 | Isosphaeraceae        | EasyDNA vs MagNAPure       |
| 12.0832988 | 2.86029733 | 0.72533982 | 3.94338935 | 8.03E-05   | 0.0008206  | Microthrixaceae       | FastDNA vs QIAStool        |
| 858.112951 | -1.2606274 | 0.32020896 | -3.9368897 | 8.25E-05   | 0.00082545 | Legionellaceae        | FastDNA vs PowerSoil.HMP   |
| 49.8040986 | 2.84923277 | 0.62918338 | 4.52846159 | 5.94E-06   | 0.00084963 | Actinomycetaceae      | InnuPURE vs PowerSoil.HMP  |
| 141.200238 | -1.3748839 | 0.3732346  | -3.6836989 | 0.00022987 | 0.00087939 | Chitinophagaceae      | EasyDNA vs MagNAPure       |
| 20.5932418 | 2.60659271 | 0.70858012 | 3.67861394 | 0.0002345  | 0.00087939 | [Mogibacteriaceae]    | EasyDNA vs MagNAPure       |
| 283.625111 | 3.28944084 | 0.74068442 | 4.44108277 | 8.95E-06   | 0.0009264  | Lactobacillaceae      | InnuPURE vs MagNAPure      |
| 21.4381793 | 3.18333391 | 0.83254469 | 3.82361927 | 0.00013151 | 0.00093029 | Turicibacteraceae     | EasyDNA vs QIAStool        |
| 129.664767 | -1.5315971 | 0.40361056 | -3.79474   | 0.0001478  | 0.00100644 | Sphingomonadaceae     | EasyDNA vs FastDNA         |
| 131.739477 | -1.2097072 | 0.30846328 | -3.921722  | 8.79E-05   | 0.00107054 | Hyphomicrobiaceae     | QIAStool vs MagNAPure      |
| 736.495903 | -2.5211072 | 0.67768495 | -3.7201758 | 0.00019908 | 0.00115895 | Enterobacteriaceae    | EasyDNA vs PowerSoil.HMP   |
| 105.619852 | -1.7219182 | 0.47856033 | -3.5981215 | 0.00032052 | 0.00116948 | Nitrosomonadaceae     | EasyDNA vs MagNAPure       |
| 118.159531 | -1.6800207 | 0.44427482 | -3.7814899 | 0.00015589 | 0.00117699 | Rhodobacteraceae      | EasyDNA vs QIAStool+BB     |
| 49.8040986 | 2.01409717 | 0.50832968 | 3.96218684 | 7.43E-05   | 0.00117765 | Actinomycetaceae      | FastDNA vs MagNAPure       |
| 616.023371 | 1.37539476 | 0.37422072 | 3.67535705 | 0.00023752 | 0.00133501 | Veillonellaceae       | EasyDNA vs PowerSoil.HMP   |
| 59.9667273 | -1.7905328 | 0.4630503  | -3.8668214 | 0.00011026 | 0.00153266 | Phyllobacteriaceae    | QIAStool vs QIAStool+BB    |
| 4421.89202 | 1.4148799  | 0.38994132 | 3.62844316 | 0.00028514 | 0.00154924 | Campylobacteraceae    | EasyDNA vs PowerSoil.HMP   |
| 7.76499835 | 3.00619582 | 0.78949885 | 3.80772665 | 0.00014025 | 0.00161288 | Victivallaceae        | QIAStool vs MagNAPure      |
| 858.112951 | -1.103653  | 0.29099694 | -3.7926618 | 0.00014904 | 0.00168722 | Legionellaceae        | PowerSoil.HMP vs QIAStool  |
| 118.339928 | -1.1641985 | 0.30830147 | -3.7761692 | 0.00015926 | 0.00168722 | [Chthoniobacteraceae] | PowerSoil.HMP vs QIAStool  |
| 224.417038 | 1.54686811 | 0.40966719 | 3.77591408 | 0.00015942 | 0.00168722 | Caulobacteraceae      | PowerSoil.HMP vs QIAStool  |
| 31.145957  | 3.18626251 | 0.86955576 | 3.66424172 | 0.00024807 | 0.00169221 | Aerococcaceae         | EasyDNA vs QIAStool        |
| 264.350163 | 1.08538354 | 0.29166878 | 3.72128808 | 0.00019821 | 0.00188959 | Leptotrichiaceae      | FastDNA vs QIAStool        |
| 91.6048239 | -1.1722866 | 0.3237836  | -3.6205868 | 0.00029394 | 0.00191058 | Halomonadaceae        | EasyDNA vs FastDNA         |
| 7.94601326 | 3.25719295 | 0.87981198 | 3.70214661 | 0.00021378 | 0.00191069 | Micrococcaceae        | FastDNA vs QIAStool        |
| 15.0781299 | 2.03353532 | 0.58767751 | 3.46029119 | 0.00053959 | 0.00191697 | [Odoribacteraceae]    | EasyDNA vs MagNAPure       |
| 38.1375375 | 1.96739339 | 0.52466333 | 3.74982069 | 0.00017696 | 0.00192794 | Procabacteriaceae     | QIAStool vs MagNAPure      |
| 12.0832988 | 2.60554261 | 0.71947574 | 3.62144612 | 0.00029296 | 0.0019295  | Microthrixaceae       | EasyDNA vs QIAStool        |
| 269.467613 | 3.28592868 | 0.91384685 | 3.59571046 | 0.00032351 | 0.00201137 | [Paraprevotellaceae]  | EasyDNA vs FastDNA         |
| 59.9667273 | -1.5618619 | 0.41967538 | -3.7215952 | 0.00019797 | 0.00204897 | Phyllobacteriaceae    | QIAStool vs MagNAPure      |
| 92.6279814 | 1.60546842 | 0.44860355 | 3.57881343 | 0.00034516 | 0.00205114 | Oxalobacteraceae      | EasyDNA vs FastDNA         |
| 60.913589  | -1.2906483 | 0.36164555 | -3.5688212 | 0.00035859 | 0.00205114 | SB-1                  | EasyDNA vs FastDNA         |
| 8.22875632 | -3.0323745 | 0.85554848 | -3.5443632 | 0.00039356 | 0.00206938 | Solibacteraceae       | EasyDNA vs PowerSoil.HMP   |
| 458.885072 | 2.1290759  | 0.52006231 | 4.09388616 | 4.24E-05   | 0.00207036 | Carnobacteriaceae     | InnuPURE vs PowerSoil.HMP  |
| 649.223144 | 1.77916883 | 0.43517387 | 4.08840914 | 4.34E-05   | 0.00207036 | Bifidobacteriaceae    | InnuPURE vs PowerSoil.HMP  |
| 118.159531 | -1.4258087 | 0.38539195 | -3.6996327 | 0.00021591 | 0.00212827 | Rhodobacteraceae      | QIAStool vs MagNAPure      |

bioRxiv preprint doi: <https://doi.org/10.1101/064394>; this version posted July 18, 2016. The copyright holder for this preprint (which was not certified by peer review) is the author/funder, who has granted bioRxiv a license to display the preprint in perpetuity. It is made available under aCC-BY 4.0 International license.

|            |            |            |            |            |            |                       |                              |
|------------|------------|------------|------------|------------|------------|-----------------------|------------------------------|
| 3.24919787 | 3.6188219  | 1.00940315 | 3.58511056 | 0.00033694 | 0.00214316 | Leucomnostocaceae     | EasyDNA vs QIAStool          |
| 33.4444509 | 2.98208837 | 0.80192515 | 3.71866173 | 0.00020028 | 0.00217639 | Coriobacteriaceae     | EasyDNA vs InnuPURE          |
| 1110.97909 | -0.706397  | 0.19141459 | -3.6904028 | 0.0002239  | 0.00218732 | Verrucomicrobiaceae   | PowerSoil.HMP vs QIAStool    |
| 858.112951 | 1.1933291  | 0.31822856 | 3.74991205 | 0.0001769  | 0.00223533 | Legionellaceae        | QIAStool vs QIAStool+BB      |
| 1181.58837 | 3.09655277 | 0.88052293 | 3.51672018 | 0.00043691 | 0.00240303 | Prevotellaceae        | EasyDNA vs FastDNA           |
| 28.7248963 | -2.008188  | 0.59242969 | -3.389749  | 0.00069957 | 0.00242158 | Acetobacteraceae      | EasyDNA vs MagNAPure         |
| 19.2945448 | -1.9141579 | 0.56688273 | -3.3766382 | 0.00073378 | 0.00246687 | BA008                 | EasyDNA vs MagNAPure         |
| 92.6279814 | 1.52494408 | 0.4523832  | 3.37091228 | 0.0007492  | 0.00246687 | Oxalobacteraceae      | EasyDNA vs MagNAPure         |
| 169.692077 | 2.05994287 | 0.51874697 | 3.97099742 | 7.16E-05   | 0.00255871 | Pirellulaceae         | InnuPURE vs PowerSoil.HMP    |
| 354.810526 | -0.98635   | 0.27628461 | -3.5700506 | 0.00035691 | 0.00256637 | Pseudomonadaceae      | EasyDNA vs QIAStool+BB       |
| 129.664767 | -1.3164872 | 0.3730486  | -3.5289965 | 0.00041714 | 0.00257011 | Sphingomonadaceae     | EasyDNA vs QIAStool          |
| 4.87640195 | 3.65458882 | 1.09184921 | 3.34715525 | 0.00081645 | 0.00262432 | Corynebacteriaceae    | EasyDNA vs MagNAPure         |
| 22.1599751 | -3.0574814 | 0.83143843 | -3.6773395 | 0.00023568 | 0.00272995 | Sanguibacteraceae     | QIAStool vs QIAStool+BB      |
| 44.0121162 | 2.3469519  | 0.63926998 | 3.67130004 | 0.00024132 | 0.00279529 | Microbacteriaceae     | InnuPURE vs QIAStool         |
| 2.31382502 | 3.84858947 | 1.07433352 | 3.5823042  | 0.00034058 | 0.00286485 | Nocardiaceae          | FastDNA vs QIAStool          |
| 458.885072 | 2.10787358 | 0.51588    | 4.08597657 | 4.39E-05   | 0.00302853 | Carnobacteriaceae     | InnuPURE vs MagNAPure        |
| 17.3475351 | -2.7947582 | 0.75672129 | -3.6932464 | 0.00022141 | 0.00303647 | Isosphaeraceae        | PowerSoil.HMP vs MagNAPure   |
| 47.3908296 | 1.37466258 | 0.40163928 | 3.42262981 | 0.00062018 | 0.00328468 | Christensenellaceae   | EasyDNA vs FastDNA           |
| 169.692077 | -1.7496979 | 0.46383396 | -3.7722504 | 0.00016178 | 0.0033327  | Pirellulaceae         | QIAStool+BB vs MagNAPure     |
| 113.494552 | 1.2476785  | 0.34930574 | 3.57188087 | 0.00035443 | 0.00333483 | Alcaligenaceae        | QIAStool vs MagNAPure        |
| 113.494552 | 1.20497493 | 0.35380394 | 3.40577026 | 0.00065978 | 0.00336957 | Alcaligenaceae        | EasyDNA vs FastDNA           |
| 12.2684488 | 2.29895523 | 0.64642084 | 3.55643735 | 0.00037592 | 0.00338326 | Synergistaceae        | QIAStool vs MagNAPure        |
| 28.7248963 | -1.9922099 | 0.56229317 | -3.5430093 | 0.00039559 | 0.00351634 | Acetobacteraceae      | FastDNA vs PowerSoil.HMP     |
| 2750.67146 | 1.695233   | 0.46819787 | 3.6207619  | 0.00029374 | 0.00352484 | Bacteroidaceae        | PowerSoil.HMP vs MagNAPure   |
| 118.159531 | -1.7715548 | 0.49520976 | -3.5773826 | 0.00034705 | 0.00353559 | Rhodobacteraceae      | EasyDNA vs InnuPURE          |
| 92.6279814 | -1.6411801 | 0.46414377 | -3.5359305 | 0.00040634 | 0.00354978 | Oxalobacteraceae      | PowerSoil.HMP vs QIAStool    |
| 649.223144 | 1.28566191 | 0.36445274 | 3.52765052 | 0.00041927 | 0.00354978 | Bifidobacteriaceae    | PowerSoil.HMP vs QIAStool    |
| 44.0121162 | -2.1137016 | 0.58933766 | -3.5865715 | 0.00033505 | 0.00357391 | Microbacteriaceae     | PowerSoil.HMP vs MagNAPure   |
| 354.810526 | -0.8207072 | 0.25232262 | -3.2526104 | 0.0011435  | 0.00359006 | Pseudomonadaceae      | EasyDNA vs MagNAPure         |
| 12.0832988 | -2.8162903 | 0.78971557 | -3.5662084 | 0.00036218 | 0.00387258 | Microthrixaceae       | QIAStool vs QIAStool+BB      |
| 169.692077 | 1.41344996 | 0.42000085 | 3.36535026 | 0.00076447 | 0.003894   | Pirellulaceae         | EasyDNA vs PowerSoil.HMP     |
| 1110.97909 | -0.8492203 | 0.23853992 | -3.5600764 | 0.00037075 | 0.00396414 | Verrucomicrobiaceae   | InnuPURE vs QIAStool         |
| 118.159531 | -1.5107086 | 0.41671211 | -3.6253053 | 0.00028862 | 0.00400461 | Rhodobacteraceae      | FastDNA vs MagNAPure         |
| 639.445335 | 1.16043718 | 0.33390826 | 3.47531735 | 0.00051025 | 0.00403097 | Marinilabiaceae       | FastDNA vs QIAStool          |
| 993.963868 | -1.7178466 | 0.49615794 | -3.4622979 | 0.00053558 | 0.00403097 | Opitutaceae           | FastDNA vs QIAStool          |
| 59.9667273 | -1.4629208 | 0.45541119 | -3.2123076 | 0.00131673 | 0.00403998 | Phyllobacteriaceae    | EasyDNA vs MagNAPure         |
| 7.4067071  | -2.8464888 | 0.85314609 | -3.3364612 | 0.00084852 | 0.00419119 | Desulfobacteraceae    | EasyDNA vs PowerSoil.HMP     |
| 719.094782 | -1.3002032 | 0.36982603 | -3.5157159 | 0.00043857 | 0.00421027 | Streptococcaceae      | PowerSoil.HMP vs MagNAPure   |
| 118.159531 | -1.4733244 | 0.41877181 | -3.5182035 | 0.00043448 | 0.00431376 | Rhodobacteraceae      | QIAStool vs QIAStool+BB      |
| 593.953594 | -0.7654102 | 0.23067053 | -3.3181968 | 0.00090601 | 0.0043435  | Cytophagaceae         | EasyDNA vs PowerSoil.HMP     |
| 59.9667273 | -1.6915917 | 0.49533902 | -3.4150181 | 0.00063778 | 0.00437747 | Phyllobacteriaceae    | EasyDNA vs QIAStool+BB       |
| 70.3986464 | 1.2061253  | 0.36301817 | 3.32249295 | 0.00089217 | 0.00439932 | Desulfovibrionaceae   | EasyDNA vs FastDNA           |
| 269.467613 | 3.16345108 | 0.93031323 | 3.40041501 | 0.00067284 | 0.00441732 | [Paraprevotellaceae]  | EasyDNA vs QIAStool+BB       |
| 1181.58837 | 2.792938   | 0.8806047  | 3.17161376 | 0.00151594 | 0.00454783 | Prevotellaceae        | EasyDNA vs MagNAPure         |
| 182.91656  | -1.3835089 | 0.37942483 | -3.6463319 | 0.00026601 | 0.00456651 | Planctomycetaceae     | QIAStool+BB vs MagNAPure     |
| 4421.89202 | 1.229723   | 0.38951484 | 3.15706329 | 0.00159367 | 0.00467707 | Campylobacteraceae    | EasyDNA vs MagNAPure         |
| 19.2945448 | -2.0575467 | 0.61259008 | -3.3587659 | 0.00078291 | 0.00476931 | BA008                 | EasyDNA vs QIAStool+BB       |
| 92.6279814 | 1.70551314 | 0.50813645 | 3.35640779 | 0.00078962 | 0.00476931 | Oxalobacteraceae      | EasyDNA vs QIAStool+BB       |
| 15.0781299 | 2.00704774 | 0.61163899 | 3.28142545 | 0.00103284 | 0.00481008 | [Odoribacteraceae]    | EasyDNA vs PowerSoil.HMP     |
| 254.528648 | -1.3406432 | 0.42677372 | -3.1413445 | 0.00168174 | 0.00483053 | Xanthomonadaceae      | EasyDNA vs MagNAPure         |
| 129.664767 | -1.4706229 | 0.44044394 | -3.3389559 | 0.00084094 | 0.00488391 | Sphingomonadaceae     | EasyDNA vs QIAStool+BB       |
| 60.913589  | 1.45888204 | 0.41924116 | 3.4798159  | 0.00050176 | 0.00498174 | SB-1                  | InnuPURE vs QIAStool         |
| 11.2601759 | 2.86575309 | 0.92393381 | 3.10168657 | 0.00192422 | 0.00541186 | Peptococcaceae        | EasyDNA vs MagNAPure         |
| 458.885072 | -1.8935274 | 0.45074517 | -4.2008822 | 2.66E-05   | 0.00550365 | Carnobacteriaceae     | PowerSoil.HMP vs QIAStool+BB |
| 736.495903 | -3.0921527 | 0.82941526 | -3.7281117 | 0.00019292 | 0.00551751 | Enterobacteriaceae    | InnuPURE vs PowerSoil.HMP    |
| 129.664767 | -1.3324584 | 0.41218724 | -3.2326533 | 0.00122646 | 0.00555315 | Sphingomonadaceae     | EasyDNA vs PowerSoil.HMP     |
| 118.159531 | -1.3509387 | 0.4195755  | -3.2197749 | 0.00128291 | 0.00565175 | Rhodobacteraceae      | EasyDNA vs PowerSoil.HMP     |
| 11.2601759 | 3.04335101 | 0.94850206 | 3.20858662 | 0.00133389 | 0.00572169 | Peptococcaceae        | EasyDNA vs PowerSoil.HMP     |
| 616.023371 | 1.33864065 | 0.39319285 | 3.40453967 | 0.00066276 | 0.00607517 | Veillonellaceae       | QIAStool vs QIAStool+BB      |
| 103.008126 | -1.3554459 | 0.40137289 | -3.377024  | 0.00073275 | 0.00607517 | Enterococcaceae       | QIAStool vs QIAStool+BB      |
| 24.9235631 | -1.717352  | 0.51140949 | -3.3580762 | 0.00078487 | 0.00607517 | [Bryobacteraceae]     | QIAStool vs QIAStool+BB      |
| 60.913589  | -1.3029449 | 0.38807828 | -3.3574279 | 0.00078671 | 0.00607517 | SB-1                  | QIAStool vs QIAStool+BB      |
| 22.5747955 | 1.6881564  | 0.55662937 | 3.0328195  | 0.0024228  | 0.00667507 | Peptostreptococcaceae | EasyDNA vs MagNAPure         |
| 7.4067071  | -2.6173944 | 0.80329827 | -3.2583096 | 0.00112078 | 0.00668966 | Desulfobacteraceae    | EasyDNA vs QIAStool          |
| 12.2684488 | 2.11983061 | 0.66428024 | 3.19116918 | 0.00141698 | 0.00675428 | Synergistaceae        | EasyDNA vs FastDNA           |

bioRxiv preprint doi: <https://doi.org/10.1101/064394>; this version posted July 18, 2016. The copyright holder for this preprint (which was not certified by peer review) is the author/funder, who has granted bioRxiv a license to display the preprint in perpetuity. It is made available under aCC-BY 4.0 International license.

|            |            |            |            |            |            |                       |                            |
|------------|------------|------------|------------|------------|------------|-----------------------|----------------------------|
| 104.663517 | 1.42534693 | 0.4244879  | 3.35780346 | 0.00078564 | 0.00685053 | Rikenellaceae         | PowerSoil.HMP vs MagNAPure |
| 20.5932418 | 2.78844857 | 0.82723718 | 3.37079697 | 0.00074951 | 0.00718649 | [Mogibacteriaceae]    | EasyDNA vs InnuPURE        |
| 993.963868 | -2.017559  | 0.60189132 | -3.3520321 | 0.00080221 | 0.00743379 | Opiritaceae           | InnuPURE vs QIAstool       |
| 186.231671 | -0.9108244 | 0.30550845 | -2.9813394 | 0.0028699  | 0.00768192 | Rhizobiaceae          | EasyDNA vs MagNAPure       |
| 1110.97909 | -0.5821481 | 0.19548775 | -2.9779262 | 0.00290206 | 0.00768192 | Verrucomicrobiaceae   | EasyDNA vs MagNAPure       |
| 59.9667273 | -1.5324296 | 0.44867974 | -3.4154197 | 0.00063684 | 0.00785434 | Phyllobacteriaceae    | FastDNA vs MagNAPure       |
| 579.211848 | -0.8687005 | 0.27121003 | -3.2030546 | 0.00135978 | 0.00787025 | Cryomorphaceae        | EasyDNA vs QIAstool        |
| 103.008126 | 1.06883487 | 0.34143186 | 3.13044852 | 0.0017454  | 0.00805134 | Enterococcaceae       | EasyDNA vs FastDNA         |
| 118.159531 | 1.5648585  | 0.47276645 | 3.31000327 | 0.00093295 | 0.00810499 | Rhodobacteraceae      | InnuPURE vs QIAstool       |
| 8.22875632 | 2.50314686 | 0.76230268 | 3.28366528 | 0.00102467 | 0.00813328 | Solibacteraceae       | PowerSoil.HMP vs QIAstool  |
| 20.5932418 | 2.47178571 | 0.77677805 | 3.18210037 | 0.00146211 | 0.00817699 | [Mogibacteriaceae]    | EasyDNA vs QIAstool+BB     |
| 49.8040986 | 2.25915369 | 0.59809529 | 3.7772471  | 0.00015857 | 0.00820607 | Actinomycetaceae      | InnuPURE vs MagNAPure      |
| 103.008126 | 1.68544012 | 0.47255029 | 3.56668943 | 0.00036152 | 0.00858467 | Enterococcaceae       | InnuPURE vs PowerSoil.HMP  |
| 622.632062 | 1.49623869 | 0.42421902 | 3.52704296 | 0.00042023 | 0.00858467 | Flavobacteriaceae     | InnuPURE vs PowerSoil.HMP  |
| 6.92597984 | -2.9939275 | 0.90591845 | -3.3048533 | 0.00095026 | 0.00860514 | [Chromatiaceae]       | EasyDNA vs InnuPURE        |
| 7.94601326 | 2.36493345 | 0.80553543 | 2.93585279 | 0.00332632 | 0.00863564 | Micrococcaceae        | EasyDNA vs MagNAPure       |
| 28.0267224 | 2.247816   | 0.69396685 | 3.23908267 | 0.00119915 | 0.00959318 | Succinivibrionaceae   | PowerSoil.HMP vs MagNAPure |
| 24.9235631 | -1.4990779 | 0.45978042 | -3.2604213 | 0.00111247 | 0.00959504 | [Bryobacteraceae]     | QIAstool vs MagNAPure      |
| 4421.89202 | 1.22665838 | 0.39306924 | 3.12071835 | 0.0018041  | 0.00972928 | Campylobacteraceae    | EasyDNA vs QIAstool+BB     |
| 736.495903 | 2.16738284 | 0.67437254 | 3.21392511 | 0.00130934 | 0.00978153 | Enterobacteriaceae    | PowerSoil.HMP vs QIAstool  |
| 19.2945448 | 1.55104302 | 0.48513414 | 3.19714258 | 0.00138796 | 0.00979285 | BA008                 | PowerSoil.HMP vs QIAstool  |
| 269.467613 | 2.67877514 | 0.85846322 | 3.12043087 | 0.00180587 | 0.01014472 | [Paraprevotellaceae]  | EasyDNA vs QIAstool        |
| 254.528648 | -1.2938909 | 0.42934953 | -3.0136073 | 0.00258162 | 0.01078984 | Xanthomonadaceae      | EasyDNA vs PowerSoil.HMP   |
| 4421.89202 | -1.2253129 | 0.38948425 | -3.1459884 | 0.00165527 | 0.01106414 | Campylobacteraceae    | PowerSoil.HMP vs QIAstool  |
| 60.913589  | -1.04435   | 0.3664465  | -2.8499385 | 0.00437277 | 0.01113818 | SB-1                  | EasyDNA vs MagNAPure       |
| 4234.46977 | -1.025778  | 0.3242894  | -3.163156  | 0.00156069 | 0.01115891 | Ruminococcaceae       | FastDNA vs QIAstool        |
| 17.3475351 | -2.6763124 | 0.799256   | -3.3485046 | 0.00081249 | 0.01146109 | Isophaeraceae         | QIAstool+BB vs MagNAPure   |
| 622.632062 | -1.2115734 | 0.36458966 | -3.3231151 | 0.00089018 | 0.01146109 | Flavobacteriaceae     | QIAstool+BB vs MagNAPure   |
| 264.350163 | 0.85382433 | 0.2783669  | 3.0672624  | 0.00216029 | 0.01178902 | Leptotrichiaceae      | EasyDNA vs QIAstool        |
| 12.2684488 | 1.94066769 | 0.68710829 | 2.82439859 | 0.00473694 | 0.01184236 | Synergistaceae        | EasyDNA vs MagNAPure       |
| 993.963868 | -1.503144  | 0.50502245 | -2.9763905 | 0.00291663 | 0.01186219 | Opiritaceae           | EasyDNA vs PowerSoil.HMP   |
| 131.739477 | -1.0249579 | 0.34517249 | -2.969408  | 0.00298374 | 0.01186219 | Hyphomicrobiaceae     | EasyDNA vs PowerSoil.HMP   |
| 4.87640195 | 3.28815114 | 1.07742791 | 3.05185257 | 0.00227434 | 0.01206663 | Corynebacteriaceae    | EasyDNA vs QIAstool        |
| 31.145957  | 2.54682017 | 0.91162549 | 2.79371319 | 0.00521067 | 0.01278982 | Aerococcaceae         | EasyDNA vs MagNAPure       |
| 1110.97909 | -0.7305016 | 0.22421632 | -3.2580214 | 0.00112192 | 0.01283975 | Verrucomicrobiaceae   | QIAstool+BB vs MagNAPure   |
| 113.494552 | 1.40369726 | 0.44319404 | 3.16722954 | 0.00153899 | 0.0132029  | Alcaligenaceae        | EasyDNA vs InnuPURE        |
| 60.913589  | 1.09927041 | 0.35735416 | 3.07613715 | 0.00209701 | 0.01331604 | SB-1                  | PowerSoil.HMP vs QIAstool  |
| 4.06716246 | 2.70023017 | 0.85880434 | 3.14417387 | 0.00166556 | 0.01379087 | Elusimicrobiaceae     | QIAstool vs MagNAPure      |
| 49.8040986 | -1.671613  | 0.53708995 | -3.1123519 | 0.00185603 | 0.0139388  | Actinomycetaceae      | QIAstool vs MagNAPure      |
| 224.417038 | -1.2657762 | 0.40782434 | -3.103729  | 0.00191098 | 0.0139388  | Caulobacteraceae      | QIAstool vs MagNAPure      |
| 182.91656  | -0.9604176 | 0.30999369 | -3.0981843 | 0.0019471  | 0.0139388  | Planctomycetaceae     | QIAstool vs MagNAPure      |
| 858.112951 | -0.8756507 | 0.28271224 | -3.0973216 | 0.00195278 | 0.0139388  | Legionellaceae        | QIAstool vs MagNAPure      |
| 4830.98886 | 0.90318919 | 0.30567964 | 2.954692   | 0.00312981 | 0.01398635 | Moraxellaceae         | EasyDNA vs FastDNA         |
| 127.559639 | -1.1983362 | 0.38295763 | -3.1291612 | 0.00175306 | 0.01402449 | Bradyrhizobiaceae     | FastDNA vs PowerSoil.HMP   |
| 4.81963649 | -2.5920036 | 0.86507369 | -2.9962807 | 0.00273295 | 0.01410792 | auto67_4W             | EasyDNA vs QIAstool        |
| 3.21882027 | -2.9945197 | 1.02979292 | -2.9078853 | 0.00363882 | 0.01412208 | Geobacteraceae        | EasyDNA vs PowerSoil.HMP   |
| 103.008126 | 1.32628602 | 0.42621318 | 3.11179028 | 0.00185957 | 0.01422317 | Enterococcaceae       | EasyDNA vs InnuPURE        |
| 269.467613 | 3.07998123 | 0.99275227 | 3.10246708 | 0.00191915 | 0.01422317 | [Paraprevotellaceae]  | EasyDNA vs InnuPURE        |
| 28.7248963 | -2.1158352 | 0.68200314 | -3.1023834 | 0.00191969 | 0.01422317 | Acetobacteraceae      | EasyDNA vs InnuPURE        |
| 12.0832988 | 2.60257042 | 0.83588608 | 3.11354678 | 0.00184853 | 0.01511447 | Microthrixaceae       | InnuPURE vs QIAstool       |
| 15.0781299 | 1.90584145 | 0.64043532 | 2.9758531  | 0.00292175 | 0.01521324 | [Odoribacteraceae]    | EasyDNA vs QIAstool+BB     |
| 7.94601326 | -2.9156223 | 0.9471339  | -3.0783634 | 0.00208141 | 0.01522715 | Micrococcaceae        | QIAstool vs QIAstool+BB    |
| 118.339928 | -1.0389997 | 0.34156999 | -3.0418353 | 0.00235141 | 0.01531368 | [Chthoniobacteraceae] | FastDNA vs PowerSoil.HMP   |
| 4234.46977 | -1.0690832 | 0.35423431 | -3.0180115 | 0.00254439 | 0.01531368 | Ruminococcaceae       | FastDNA vs PowerSoil.HMP   |
| 719.094782 | 1.11333967 | 0.36942897 | 3.01367723 | 0.00258102 | 0.01531368 | Streptococcaceae      | FastDNA vs PowerSoil.HMP   |
| 169.692077 | 1.31061062 | 0.43885856 | 2.98640779 | 0.00282276 | 0.01531368 | Pirellulaceae         | FastDNA vs PowerSoil.HMP   |
| 283.625111 | 1.88675667 | 0.63288731 | 2.98118896 | 0.00287132 | 0.01531368 | Lactobacillaceae      | FastDNA vs PowerSoil.HMP   |
| 91.6048239 | -0.9688326 | 0.3376377  | -2.8694444 | 0.00411194 | 0.0153584  | Halomonadaceae        | EasyDNA vs PowerSoil.HMP   |
| 269.467613 | 2.62362002 | 0.91515855 | 2.86684753 | 0.00414583 | 0.0153584  | [Paraprevotellaceae]  | EasyDNA vs PowerSoil.HMP   |
| 169.692077 | -1.0885501 | 0.39949647 | -2.7248053 | 0.00643394 | 0.01551039 | Pirellulaceae         | EasyDNA vs MagNAPure       |
| 118.339928 | 0.85515562 | 0.31545607 | 2.71085484 | 0.006711   | 0.01589447 | [Chthoniobacteraceae] | EasyDNA vs MagNAPure       |
| 4.27355164 | -2.8506251 | 0.93680851 | -3.0429112 | 0.00234301 | 0.01628395 | Eubacteriaceae        | QIAstool vs QIAstool+BB    |
| 21.5427213 | 2.62816676 | 0.89319412 | 2.94243625 | 0.00325641 | 0.01636774 | Spirochaetaceae       | EasyDNA vs QIAstool        |
| 59.9667273 | 1.56849566 | 0.51094835 | 3.0697734  | 0.00214221 | 0.01654264 | Phyllobacteriaceae    | InnuPURE vs QIAstool       |
| 118.339928 | 1.19613294 | 0.39335639 | 3.04083768 | 0.00235921 | 0.01671962 | [Chthoniobacteraceae] | EasyDNA vs InnuPURE        |



bioRxiv preprint doi: <https://doi.org/10.1101/064394>; this version posted July 18, 2016. The copyright holder for this preprint (which was not certified by peer review) is the author/funder, who has granted bioRxiv a license to display the preprint in perpetuity. It is made available under aCC-BY 4.0 International license.

|            |            |            |            |            |            |                       |                            |
|------------|------------|------------|------------|------------|------------|-----------------------|----------------------------|
| 224.417038 | -1.3016651 | 0.44367212 | -2.9338446 | 0.0034792  | 0.01673959 | Caeniobacteraceae     | FastDNA vs PowerSoil.HMP   |
| 993.963868 | -1.499755  | 0.51224519 | -2.9278069 | 0.00341362 | 0.01679999 | Opiritaceae           | EasyDNA vs QIAstool+BB     |
| 131.739477 | -1.0909518 | 0.37302612 | -2.9245989 | 0.003449   | 0.01679999 | Hyphomicrobiaceae     | EasyDNA vs QIAstool+BB     |
| 21.5427213 | 2.53561288 | 0.94480086 | 2.68375379 | 0.00728007 | 0.01690336 | Spirochaetaceae       | EasyDNA vs MagNAPure       |
| 333.941631 | 1.06355661 | 0.39701881 | 2.67885697 | 0.00738739 | 0.01690336 | Porphyromonadaceae    | EasyDNA vs MagNAPure       |
| 28.7345598 | -1.6199105 | 0.55646094 | -2.9110947 | 0.00360165 | 0.01699528 | Parachlamydiaceae     | EasyDNA vs QIAstool+BB     |
| 21.4381793 | 2.87852569 | 0.94506216 | 3.04585858 | 0.00232017 | 0.01713356 | Turicibacteraceae     | PowerSoil.HMP vs MagNAPure |
| 118.159531 | -1.2291424 | 0.42307595 | -2.9052522 | 0.00366957 | 0.01726858 | Rhodobacteraceae      | FastDNA vs PowerSoil.HMP   |
| 104.663517 | 1.26962895 | 0.43903252 | 2.89187904 | 0.00382945 | 0.01732243 | Rikenellaceae         | EasyDNA vs QIAstool+BB     |
| 21.5427213 | 2.85758764 | 0.99453991 | 2.87327597 | 0.00406239 | 0.01732243 | Spirochaetaceae       | EasyDNA vs QIAstool+BB     |
| 1181.58837 | 2.53355579 | 0.88411161 | 2.86565152 | 0.00416152 | 0.01732243 | Prevotellaceae        | EasyDNA vs QIAstool+BB     |
| 355.031722 | 1.13809798 | 0.39794486 | 2.85993889 | 0.00423723 | 0.01732243 | [Weeksellaceae]       | EasyDNA vs QIAstool+BB     |
| 113.494552 | 1.15165021 | 0.40396852 | 2.85084148 | 0.00436037 | 0.01732243 | Alcaligenaceae        | EasyDNA vs QIAstool+BB     |
| 28.7248963 | -1.8378156 | 0.64637612 | -2.8432603 | 0.00446546 | 0.01732243 | Acetobacteraceae      | EasyDNA vs QIAstool+BB     |
| 118.339928 | 1.02243338 | 0.35967603 | 2.84265084 | 0.00447401 | 0.01732243 | [Chthoniobacteraceae] | EasyDNA vs QIAstool+BB     |
| 7.4067071  | -2.533754  | 0.89397879 | -2.834244  | 0.00459342 | 0.01734018 | Desulfobacteraceae    | EasyDNA vs QIAstool+BB     |
| 4.81963649 | -2.5721622 | 0.89514869 | -2.8734468 | 0.00406019 | 0.01759417 | auto67_4W             | EasyDNA vs FastDNA         |
| 38.1375375 | -1.588819  | 0.53677015 | -2.9599616 | 0.00307677 | 0.0176333  | Procabacteriaceae     | PowerSoil.HMP vs QIAstool  |
| 993.963868 | -1.4686531 | 0.49715551 | -2.9541121 | 0.0031357  | 0.0176333  | Opiritaceae           | PowerSoil.HMP vs QIAstool  |
| 377.356263 | 0.66481791 | 0.22547835 | 2.94847773 | 0.00319343 | 0.0176333  | Sphingobacteriaceae   | PowerSoil.HMP vs QIAstool  |
| 70.3986464 | 1.07418554 | 0.3564197  | 3.01382203 | 0.00257979 | 0.01780056 | Desulfovibrionaceae   | QIAstool vs MagNAPure      |
| 4830.98886 | 0.86879822 | 0.30910597 | 2.8106808  | 0.00494368 | 0.01820721 | Moraxellaceae         | EasyDNA vs QIAstool+BB     |
| 622.632062 | 1.20011256 | 0.39698082 | 3.02309962 | 0.002502   | 0.0183041  | Flavobacteriaceae     | InnuPURE vs QIAstool       |
| 22.1599751 | 2.34056949 | 0.78040891 | 2.99915784 | 0.00270727 | 0.01833074 | Sanguibacteriaceae    | FastDNA vs QIAstool        |
| 579.211848 | 0.84548558 | 0.2831535  | 2.98596192 | 0.00282688 | 0.01833074 | Cryomorphaceae        | FastDNA vs QIAstool        |
| 310.195483 | -1.1140138 | 0.37470056 | -2.9730774 | 0.0029483  | 0.01833074 | Aeromonadaceae        | FastDNA vs QIAstool        |
| 21.5427213 | 2.67648334 | 0.94093314 | 2.84449896 | 0.00444813 | 0.01841406 | Spirochaetaceae       | EasyDNA vs FastDNA         |
| 3.24919787 | 2.81122058 | 0.98975752 | 2.84031241 | 0.00450694 | 0.01841406 | Leuconostocaceae      | EasyDNA vs FastDNA         |
| 118.159531 | 1.14424238 | 0.39230985 | 2.91668023 | 0.00353778 | 0.01872077 | Rhodobacteraceae      | PowerSoil.HMP vs QIAstool  |
| 1181.58837 | 2.37174212 | 0.82321907 | 2.88105827 | 0.00396342 | 0.01884447 | Prevotellaceae        | EasyDNA vs QIAstool        |
| 4830.98886 | 0.79076118 | 0.27480994 | 2.87748395 | 0.0040086  | 0.01884447 | Moraxellaceae         | EasyDNA vs QIAstool        |
| 4.27355164 | 2.54518735 | 0.8853998  | 2.87461931 | 0.00404515 | 0.01884447 | Eubacteriaceae        | EasyDNA vs QIAstool        |
| 113.494552 | 1.15379451 | 0.38639387 | 2.98605802 | 0.00282599 | 0.01937822 | Alcaligenaceae        | PowerSoil.HMP vs MagNAPure |
| 92.6279814 | 1.64386434 | 0.5519235  | 2.97842786 | 0.00289731 | 0.01967758 | Oxalobacteraceae      | EasyDNA vs InnuPURE        |
| 18.7347412 | 1.74564306 | 0.58736763 | 2.97197698 | 0.00295889 | 0.01975774 | [Barnesiellaceae]     | QIAstool vs MagNAPure      |
| 24.9235631 | -1.9126891 | 0.64531773 | -2.9639494 | 0.00303718 | 0.01980243 | [Bryobacteraceae]     | EasyDNA vs InnuPURE        |
| 243.261282 | -1.0090776 | 0.33828228 | -2.9829456 | 0.00285489 | 0.01984147 | GZKB119               | InnuPURE vs QIAstool       |
| 12.0832988 | 1.9612567  | 0.7511158  | 2.61112429 | 0.00902451 | 0.02030515 | Microthrixaceae       | EasyDNA vs MagNAPure       |
| 2750.67146 | 1.28916277 | 0.43584769 | 2.95782861 | 0.00309814 | 0.02050676 | Bacteroidaceae        | QIAstool vs QIAstool+BB    |
| 243.261282 | -0.7295655 | 0.25759568 | -2.8322118 | 0.00462272 | 0.02102238 | GZKB119               | EasyDNA vs QIAstool        |
| 79.5100271 | -1.191318  | 0.43277484 | -2.7527432 | 0.00590982 | 0.0214067  | Bdellovibrionaceae    | EasyDNA vs PowerSoil.HMP   |
| 19.2945448 | -1.5596526 | 0.56244073 | -2.7730079 | 0.00555408 | 0.02193946 | BA008                 | EasyDNA vs FastDNA         |
| 11.2601759 | 2.50254376 | 0.90615756 | 2.76170929 | 0.00574997 | 0.02193946 | Peptococcaceae        | EasyDNA vs FastDNA         |
| 593.953594 | -0.62696   | 0.22739104 | -2.7571889 | 0.00583007 | 0.02193946 | Cytophagaceae         | EasyDNA vs FastDNA         |
| 10.9576795 | -2.0973714 | 0.76485713 | -2.7421741 | 0.0061034  | 0.02194317 | Acholeplasmataceae    | EasyDNA vs QIAstool+BB     |
| 593.953594 | -0.5824492 | 0.20721534 | -2.8108403 | 0.00494123 | 0.02194826 | Cytophagaceae         | EasyDNA vs QIAstool        |
| 993.963868 | 1.47204213 | 0.50450751 | 2.91778038 | 0.00352533 | 0.02227365 | Opiritaceae           | QIAstool vs QIAstool+BB    |
| 10.9576795 | -1.8987571 | 0.68029491 | -2.7910793 | 0.00525326 | 0.02280392 | Acholeplasmataceae    | EasyDNA vs QIAstool        |
| 7.4067071  | -2.284038  | 0.8363462  | -2.7309719 | 0.00631478 | 0.02315421 | Desulfobacteraceae    | EasyDNA vs FastDNA         |
| 1110.97909 | -0.5394896 | 0.18836632 | -2.8640448 | 0.00418269 | 0.02338949 | Verrucomicrobiaceae   | FastDNA vs QIAstool        |
| 377.356263 | 0.62991124 | 0.22044344 | 2.85747327 | 0.00427029 | 0.02338949 | Sphingobacteriaceae   | FastDNA vs QIAstool        |
| 24.9235631 | 1.29672979 | 0.45420932 | 2.85491676 | 0.00430481 | 0.02338949 | [Bryobacteraceae]     | FastDNA vs QIAstool        |
| 31.145957  | 2.57510178 | 0.90456212 | 2.84679374 | 0.0044162  | 0.02338949 | Aerococcaceae         | FastDNA vs QIAstool        |
| 12.9936921 | -1.8506044 | 0.72523789 | -2.5517205 | 0.01071925 | 0.02372292 | Hyphomonadaceae       | EasyDNA vs MagNAPure       |
| 355.031722 | 0.99703315 | 0.36955369 | 2.69793854 | 0.00697703 | 0.02431227 | [Weeksellaceae]       | EasyDNA vs PowerSoil.HMP   |
| 264.350163 | -0.8216819 | 0.30473801 | -2.6963553 | 0.00701029 | 0.02431227 | Leptotrichiaceae      | EasyDNA vs PowerSoil.HMP   |
| 2750.67146 | -1.2094344 | 0.42892542 | -2.8196845 | 0.00480709 | 0.02455049 | Bacteroidaceae        | FastDNA vs QIAstool        |
| 283.625111 | 1.74651589 | 0.61997486 | 2.81707535 | 0.00484632 | 0.02461928 | Lactobacillaceae      | PowerSoil.HMP vs QIAstool  |
| 79.5100271 | -1.2567499 | 0.46625307 | -2.6954243 | 0.00702991 | 0.02468641 | Bdellovibrionaceae    | EasyDNA vs QIAstool+BB     |
| 3668.6678  | 1.63743174 | 0.54128315 | 3.02509274 | 0.00248557 | 0.02560136 | Lachnospiraceae       | QIAstool+BB vs MagNAPure   |
| 44.0121162 | 1.43218661 | 0.52197913 | 2.74376222 | 0.00607395 | 0.02578055 | Microbacteriaceae     | EasyDNA vs QIAstool        |
| 1756.14884 | -0.8875915 | 0.35309787 | -2.5137266 | 0.0119463  | 0.02592108 | Neisseriaceae         | EasyDNA vs MagNAPure       |
| 18.7347412 | 1.55956336 | 0.62150923 | 2.50931647 | 0.01209651 | 0.02592108 | [Barnesiellaceae]     | EasyDNA vs MagNAPure       |
| 2750.67146 | -1.5115334 | 0.52589418 | -2.8742159 | 0.00405032 | 0.02611934 | Bacteroidaceae        | InnuPURE vs QIAstool       |
| 4.27355164 | 2.76832398 | 0.97008355 | 2.85369643 | 0.00432138 | 0.02611934 | Eubacteriaceae        | InnuPURE vs QIAstool       |



bioRxiv preprint doi: <https://doi.org/10.1101/064394>; this version posted July 18, 2016. The copyright holder for this preprint (which was not certified by peer review) is the author/funder, who has granted bioRxiv a license to display the preprint in perpetuity. It is made available under aCC-BY 4.0 International license.

|            |            |            |            |            |            |                       |                           |
|------------|------------|------------|------------|------------|------------|-----------------------|---------------------------|
| 17.3475351 | 2.27655242 | 0.79776644 | 2.85365781 | 0.00432191 | 0.02611934 | Isosphaeraceae        | InnuPURE vs QIAStool      |
| 38.1375375 | -1.4159276 | 0.50824048 | -2.7859402 | 0.00533727 | 0.02631827 | Procabacteriaceae     | FastDNA vs QIAStool       |
| 2.3093169  | -2.8715958 | 1.08020362 | -2.6583838 | 0.00785164 | 0.02694541 | Myxococcaceae         | EasyDNA vs QIAStool+BB    |
| 2.31382502 | 3.1273455  | 1.10587857 | 2.82792847 | 0.00468503 | 0.02713412 | Nocardiaceae          | InnuPURE vs QIAStool      |
| 254.528648 | -1.1861816 | 0.44926195 | -2.6402895 | 0.00828352 | 0.02779582 | Xanthomonadaceae      | EasyDNA vs QIAStool+BB    |
| 8.22875632 | -2.3772037 | 0.9049355  | -2.6269316 | 0.00861586 | 0.02828251 | Solibacteraceae       | EasyDNA vs QIAStool+BB    |
| 4.06716246 | -2.6505323 | 0.9462686  | -2.8010358 | 0.00509389 | 0.02832201 | Elusimicrobiaceae     | InnuPURE vs QIAStool      |
| 224.417038 | -1.2142892 | 0.43070396 | -2.8193127 | 0.00481266 | 0.02908521 | Caulobacteraceae      | QIAStool vs QIAStool+BB   |
| 8.97993102 | -1.9720958 | 0.74525118 | -2.6462163 | 0.00813978 | 0.0290997  | Sediment-4            | EasyDNA vs FastDNA        |
| 1.55959833 | 3.04990549 | 1.10011358 | 2.77235509 | 0.00556523 | 0.02914922 | Dermatophilaceae      | InnuPURE vs QIAStool      |
| 31.145957  | 2.73793794 | 0.98959174 | 2.76673484 | 0.00566208 | 0.02914922 | Aerococcaceae         | InnuPURE vs QIAStool      |
| 164.684355 | 2.00560381 | 0.59200326 | 3.38782561 | 0.00070449 | 0.0291659  | Clostridiaceae        | InnuPURE vs MagNAPure     |
| 21.4381793 | 2.4029683  | 0.87615781 | 2.74262042 | 0.00609511 | 0.02977227 | Turicibacteraceae     | PowerSoil.HMP vs QIAStool |
| 22.1599751 | -2.2288796 | 0.7867898  | -2.8328781 | 0.0046131  | 0.02984097 | Sanguibacteraceae     | QIAStool vs MagNAPure     |
| 11.4855136 | -1.8652956 | 0.66110538 | -2.82148   | 0.00478026 | 0.02998528 | Gemmatimonadaceae     | QIAStool vs MagNAPure     |
| 7.76499835 | 2.08136474 | 0.84932062 | 2.4506231  | 0.01426092 | 0.03008163 | Victivallaceae        | EasyDNA vs MagNAPure      |
| 20.0435737 | -1.4557469 | 0.56093764 | -2.5952027 | 0.00945351 | 0.03037193 | Saprospiraceae        | EasyDNA vs QIAStool+BB    |
| 11.2601759 | 2.81611955 | 0.99962466 | 2.81717696 | 0.00484478 | 0.03037306 | Peptococcaceae        | EasyDNA vs InnuPURE       |
| 103.008126 | 1.51734838 | 0.45684108 | 3.32139215 | 0.0008957  | 0.03090151 | Enterococcaceae       | InnuPURE vs MagNAPure     |
| 639.445335 | -0.9363952 | 0.33454193 | -2.7990367 | 0.00512553 | 0.03114536 | Marinilabiaceae       | QIAStool vs MagNAPure     |
| 719.094782 | -0.9343259 | 0.33484933 | -2.7902876 | 0.00526612 | 0.03114536 | Streptococcaceae      | QIAStool vs MagNAPure     |
| 4.06716246 | 2.44686122 | 0.880977   | 2.77744052 | 0.00547889 | 0.03173189 | Elusimicrobiaceae     | QIAStool vs QIAStool+BB   |
| 858.112951 | -1.2104768 | 0.37506448 | -3.2273833 | 0.00124928 | 0.03314836 | Legionellaceae        | InnuPURE vs MagNAPure     |
| 1.55959833 | 3.53407623 | 1.09747746 | 3.22018115 | 0.0012811  | 0.03314836 | Dermatophilaceae      | InnuPURE vs MagNAPure     |
| 3.21882027 | -2.7128444 | 1.06112987 | -2.5565621 | 0.01057122 | 0.03325529 | Geobacteraceae        | EasyDNA vs QIAStool+BB    |
| 12.9936921 | -1.8610075 | 0.71942811 | -2.5867873 | 0.00968754 | 0.03378824 | Hyphomonadaceae       | EasyDNA vs FastDNA        |
| 49.8040986 | 1.33489132 | 0.52490846 | 2.54309356 | 0.01098758 | 0.03385969 | Actinomycetaceae      | EasyDNA vs QIAStool+BB    |
| 164.684355 | 1.20633872 | 0.46822066 | 2.57643208 | 0.00998258 | 0.03389918 | Clostridiaceae        | EasyDNA vs PowerSoil.HMP  |
| 2.61442095 | -2.3742008 | 0.98904022 | -2.4005099 | 0.01637225 | 0.0340039  | Ellin515              | EasyDNA vs MagNAPure      |
| 2750.67146 | 1.37968465 | 0.46764596 | 2.95027598 | 0.0031749  | 0.03433796 | Bacteroidaceae        | FastDNA vs MagNAPure      |
| 12.0832988 | 2.21601142 | 0.75663079 | 2.92878833 | 0.00340286 | 0.03433796 | Microthrixaceae       | FastDNA vs MagNAPure      |
| 2750.67146 | 1.02138586 | 0.38739727 | 2.63653347 | 0.00837579 | 0.03446271 | Bacteroidaceae        | EasyDNA vs QIAStool       |
| 2.90378317 | -2.6542909 | 1.00834595 | -2.6323217 | 0.00848035 | 0.03446271 | Shewanellaceae        | EasyDNA vs QIAStool       |
| 2.61442095 | -2.5754714 | 0.93748593 | -2.7472107 | 0.00601045 | 0.03456009 | Ellin515              | QIAStool vs MagNAPure     |
| 1.27584029 | -3.0144798 | 1.10165276 | -2.7363248 | 0.00621297 | 0.03475903 | Methanobacteriaceae   | QIAStool vs MagNAPure     |
| 4.18916425 | 2.38221387 | 0.99895023 | 2.38471727 | 0.01709225 | 0.03480958 | Nocardioidaceae       | EasyDNA vs MagNAPure      |
| 264.350163 | -0.71875   | 0.30189642 | -2.3807835 | 0.01727586 | 0.03480958 | Leptotrichiaceae      | EasyDNA vs MagNAPure      |
| 10.9576795 | -2.197664  | 0.79886476 | -2.7509837 | 0.00594166 | 0.03577349 | Acholeplasmataceae    | EasyDNA vs InnuPURE       |
| 1181.58837 | 2.64574182 | 0.96781367 | 2.73373057 | 0.00626213 | 0.03577349 | Prevotellaceae        | EasyDNA vs InnuPURE       |
| 59.9667273 | -1.4695546 | 0.54001007 | -2.7213466 | 0.00650165 | 0.03577349 | Phyllobacteriaceae    | EasyDNA vs InnuPURE       |
| 1.55959833 | -2.9910789 | 1.10080263 | -2.71718   | 0.00658408 | 0.03577349 | Dermatophilaceae      | EasyDNA vs InnuPURE       |
| 28.0267224 | 1.50756944 | 0.58964909 | 2.55672309 | 0.01056633 | 0.03597584 | Succinivibrionaceae   | EasyDNA vs FastDNA        |
| 616.023371 | -0.9908895 | 0.37159274 | -2.6666009 | 0.00766226 | 0.036041   | Veillonellaceae       | PowerSoil.HMP vs QIAStool |
| 131.739477 | -0.8564683 | 0.33629328 | -2.5467899 | 0.01087189 | 0.03615534 | Hyphomicrobiaceae     | EasyDNA vs FastDNA        |
| 186.231671 | 0.74799507 | 0.28674278 | 2.60859252 | 0.00909154 | 0.03617677 | Rhizobiaceae          | EasyDNA vs QIAStool       |
| 118.339928 | -0.9548824 | 0.33231545 | -2.8734217 | 0.00406052 | 0.03636071 | [Chthoniobacteraceae] | FastDNA vs MagNAPure      |
| 169.692077 | -1.1913895 | 0.4193644  | -2.8409409 | 0.00449807 | 0.03636071 | Pirellulaceae         | FastDNA vs MagNAPure      |
| 182.91656  | -0.9532472 | 0.33627107 | -2.8347584 | 0.00458604 | 0.03636071 | Planctomycetaceae     | FastDNA vs MagNAPure      |
| 91.6048239 | -0.7763827 | 0.32992933 | -2.3531788 | 0.01861368 | 0.03695363 | Halomonadaceae        | EasyDNA vs MagNAPure      |
| 22.1599751 | 1.97579153 | 0.77845518 | 2.53809287 | 0.01114584 | 0.03707698 | Sanguibacteraceae     | EasyDNA vs PowerSoil.HMP  |
| 28.7345598 | -1.2703451 | 0.50442951 | -2.5183798 | 0.01178961 | 0.03804106 | Parachlamydiaceae     | EasyDNA vs FastDNA        |
| 254.528648 | -1.068488  | 0.42623526 | -2.5068033 | 0.01218285 | 0.03804106 | Xanthomonadaceae      | EasyDNA vs FastDNA        |
| 6.92597984 | -2.0759884 | 0.82940286 | -2.5029916 | 0.01231485 | 0.03804106 | [Chromatiaceae]       | EasyDNA vs FastDNA        |
| 4421.89202 | 0.97253378 | 0.38938417 | 2.49762026 | 0.012503   | 0.03804106 | Campylobacteraceae    | EasyDNA vs FastDNA        |
| 993.963868 | -1.2539505 | 0.50404268 | -2.4877864 | 0.01285409 | 0.03829448 | Opiritaceae           | EasyDNA vs FastDNA        |
| 104.663517 | 1.15256553 | 0.42682061 | 2.70035119 | 0.00692663 | 0.03851207 | Rikenellaceae         | QIAStool vs QIAStool+BB   |
| 642.395629 | -0.8728261 | 0.37490681 | -2.3281148 | 0.01990601 | 0.03894653 | Rhodocyclaceae        | EasyDNA vs MagNAPure      |
| 6.92597984 | -1.9641006 | 0.84680666 | -2.3194203 | 0.02037226 | 0.03928935 | [Chromatiaceae]       | EasyDNA vs MagNAPure      |
| 3.5697885  | -2.663582  | 0.99480591 | -2.6774891 | 0.00741763 | 0.03965577 | Beutenbergiaceae      | QIAStool vs QIAStool+BB   |
| 8.22875632 | -2.0849652 | 0.8464636  | -2.4631481 | 0.0137723  | 0.04019264 | Solibacteraceae       | EasyDNA vs FastDNA        |
| 141.200238 | 0.87472846 | 0.33424873 | 2.61699863 | 0.00887067 | 0.04023482 | Chitinophagaceae      | PowerSoil.HMP vs QIAStool |
| 4421.89202 | 1.04015603 | 0.38905723 | 2.67352962 | 0.00750576 | 0.04080907 | Campylobacteraceae    | QIAStool vs MagNAPure     |
| 4.27355164 | -2.3695014 | 0.8889705  | -2.6654444 | 0.00768866 | 0.04080907 | Eubacteriaceae        | QIAStool vs MagNAPure     |
| 28.0267224 | 1.91589962 | 0.72230348 | 2.65248565 | 0.00799015 | 0.04095456 | Succinivibrionaceae   | EasyDNA vs InnuPURE       |
| 639.445335 | -1.1176738 | 0.42467418 | -2.6318384 | 0.00849243 | 0.04095456 | Marinilabiaceae       | EasyDNA vs InnuPURE       |

bioRxiv preprint doi: <https://doi.org/10.1101/064394>; this version posted July 18, 2016. The copyright holder for this preprint (which was not certified by peer review) is the author/funder, who has granted bioRxiv a license to display the preprint in perpetuity. It is made available under aCC-BY 4.0 International license.

|            |            |            |            |            |            |                       |                            |
|------------|------------|------------|------------|------------|------------|-----------------------|----------------------------|
| 224.417038 | -1.3704338 | 0.52104201 | -2.6301791 | 0.00853399 | 0.04095456 | Caulobacteraceae      | EasyDNA vs InnuPURE        |
| 104.663517 | 1.25209331 | 0.47716645 | 2.62401793 | 0.00868992 | 0.04095456 | Rikenellaceae         | EasyDNA vs InnuPURE        |
| 4830.98886 | 0.9966009  | 0.38038735 | 2.61996329 | 0.00879392 | 0.04095456 | Moraxellaceae         | EasyDNA vs InnuPURE        |
| 21.5427213 | 2.3806915  | 0.95400598 | 2.49546812 | 0.01257911 | 0.04100788 | Spirochaetaceae       | EasyDNA vs PowerSoil.HMP   |
| 4.18916425 | 2.4527686  | 0.95878924 | 2.5581937  | 0.01052175 | 0.04101334 | Nocardioidaceae       | EasyDNA vs QIAstool        |
| 3.21882027 | -2.354502  | 1.02533773 | -2.2963185 | 0.02165768 | 0.04118009 | Geobacteraceae        | EasyDNA vs MagNAPure       |
| 3668.6678  | 1.46196977 | 0.53675835 | 2.72370194 | 0.00645547 | 0.04131503 | Lachnospiraceae       | PowerSoil.HMP vs MagNAPure |
| 9.46385082 | -1.9959877 | 0.80350941 | -2.4840875 | 0.01298839 | 0.04151191 | Polyangiaceae         | EasyDNA vs PowerSoil.HMP   |
| 28.7248963 | -1.5390212 | 0.55585699 | -2.7687358 | 0.00562742 | 0.04164294 | Acetobacteraceae      | FastDNA vs MagNAPure       |
| 355.031722 | 1.0232927  | 0.39395485 | 2.59748725 | 0.00939086 | 0.04173716 | [Weeksellaceae]       | FastDNA vs PowerSoil.HMP   |
| 7.76499835 | 2.85424593 | 0.91600206 | 3.11598202 | 0.00183333 | 0.04216669 | Victivallaceae        | InnuPURE vs MagNAPure      |
| 104.663517 | 1.13861777 | 0.41527505 | 2.74184006 | 0.00610961 | 0.04238541 | Rikenellaceae         | FastDNA vs MagNAPure       |
| 4421.89202 | 1.03709142 | 0.39261611 | 2.64148974 | 0.00825423 | 0.042494   | Campylobacteraceae    | QIAstool vs QIAstool+BB    |
| 622.632062 | 0.81772245 | 0.33204467 | 2.4626881  | 0.01378998 | 0.04266148 | Flavobacteriaceae     | EasyDNA vs PowerSoil.HMP   |
| 4.87640195 | 2.6847996  | 1.09159219 | 2.45952621 | 0.01391205 | 0.04266148 | Corynebacteriaceae    | EasyDNA vs PowerSoil.HMP   |
| 3.24919787 | 2.49848134 | 1.01818471 | 2.45385864 | 0.01413325 | 0.04266148 | Leuconostocaceae      | EasyDNA vs PowerSoil.HMP   |
| 28.7345598 | -1.1664509 | 0.51264479 | -2.275359  | 0.02288441 | 0.04290826 | Parachlamydiaceae     | EasyDNA vs MagNAPure       |
| 377.356263 | -0.5824062 | 0.2219046  | -2.6245793 | 0.00867561 | 0.04489627 | Sphingobacteriaceae   | QIAstool vs MagNAPure      |
| 2.31382502 | -2.5964006 | 1.07577379 | -2.4135191 | 0.0157993  | 0.045186   | Nocardiaceae          | EasyDNA vs FastDNA         |
| 719.094782 | -1.0989013 | 0.39008341 | -2.8170931 | 0.00484605 | 0.04537662 | Streptococcaceae      | QIAstool+BB vs MagNAPure   |
| 642.395629 | -0.8990233 | 0.37439073 | -2.4012969 | 0.01633708 | 0.04580788 | Rhodocyclaceae        | EasyDNA vs FastDNA         |
| 28.0267224 | 2.05253499 | 0.73852611 | 2.77923143 | 0.00544877 | 0.04586337 | Succinivibrionaceae   | QIAstool+BB vs MagNAPure   |
| 2750.67146 | 1.29995626 | 0.47394333 | 2.74285169 | 0.00609082 | 0.04586337 | Bacteroidaceae        | QIAstool+BB vs MagNAPure   |
| 355.031722 | -1.1521059 | 0.42121139 | -2.7352202 | 0.00623386 | 0.04586337 | [Weeksellaceae]       | QIAstool+BB vs MagNAPure   |
| 141.200238 | -0.9400847 | 0.36121392 | -2.6025706 | 0.00925278 | 0.04593342 | Chitinophagaceae      | QIAstool vs QIAstool+BB    |
| 164.684355 | 1.34712441 | 0.50064185 | 2.69079464 | 0.00712821 | 0.04654299 | Clostridiaceae        | FastDNA vs MagNAPure       |
| 59.9667273 | -1.7611005 | 0.48922251 | -3.5997946 | 0.00031847 | 0.04757822 | Phyllobacteriaceae    | FastDNA vs QIAstool+BB     |
| 118.159531 | -1.5582244 | 0.44756329 | -3.4815733 | 0.00049848 | 0.04757822 | Rhodobacteraceae      | FastDNA vs QIAstool+BB     |
| 858.112951 | -1.1709513 | 0.34503626 | -3.393705  | 0.00068954 | 0.04757822 | Legionellaceae        | FastDNA vs QIAstool+BB     |
| 44.0121162 | -1.2198065 | 0.54714401 | -2.2294067 | 0.02578686 | 0.04768803 | Microbacteriaceae     | EasyDNA vs MagNAPure       |
| 1756.14884 | -1.401038  | 0.46013475 | -3.0448428 | 0.00232802 | 0.04819001 | Neisseriaceae         | InnuPURE vs MagNAPure      |
| 1756.14884 | -1.1234205 | 0.43466028 | -2.5845943 | 0.00974937 | 0.04839863 | Neisseriaceae         | InnuPURE vs QIAstool       |
| 8.97993102 | -1.6808038 | 0.75875734 | -2.215206  | 0.02674593 | 0.04879324 | Sediment-4            | EasyDNA vs MagNAPure       |
| 3668.6678  | 1.90277585 | 0.63250342 | 3.00832499 | 0.00262692 | 0.04943387 | Lachnospiraceae       | InnuPURE vs MagNAPure      |
| 164.684355 | 1.08879511 | 0.4606952  | 2.36337412 | 0.01810938 | 0.04980079 | Clostridiaceae        | EasyDNA vs FastDNA         |
| 79.5100271 | -0.9798214 | 0.380222   | -2.5769718 | 0.00996701 | 0.05032123 | Bdellovibrionaceae    | QIAstool vs MagNAPure      |
| 186.231671 | -0.7151168 | 0.30408292 | -2.3517165 | 0.01868701 | 0.05041968 | Rhizobiaceae          | EasyDNA vs FastDNA         |
| 44.0121162 | -1.4843431 | 0.56162354 | -2.6429504 | 0.00821871 | 0.05068203 | Microbacteriaceae     | FastDNA vs MagNAPure       |
| 7.94601326 | 2.35096963 | 0.93228322 | 2.52173329 | 0.01167782 | 0.0511408  | Micrococcaceae        | PowerSoil.HMP vs QIAstool  |
| 333.941631 | 0.99974328 | 0.39058752 | 2.55958841 | 0.01047962 | 0.05164955 | Porphyromonadaceae    | QIAstool vs MagNAPure      |
| 19.2945448 | -1.6538315 | 0.65473079 | -2.5259718 | 0.01153788 | 0.05224094 | BA008                 | EasyDNA vs InnuPURE        |
| 169.692077 | 1.21462904 | 0.47776311 | 2.5423249  | 0.01101178 | 0.05253157 | Pirellulaceae         | InnuPURE vs QIAstool       |
| 28.0267224 | -1.7810983 | 0.703404   | -2.5321129 | 0.01133775 | 0.05253157 | Succinivibrionaceae   | InnuPURE vs QIAstool       |
| 118.339928 | 0.77103841 | 0.32521728 | 2.37084086 | 0.01774767 | 0.05259764 | [Chthoniobacteraceae] | EasyDNA vs PowerSoil.HMP   |
| 22.2584553 | 1.82334122 | 0.76805203 | 2.37398139 | 0.01759744 | 0.05314426 | S24-7                 | EasyDNA vs QIAstool+BB     |
| 3.24919787 | 2.62550795 | 1.04618943 | 2.50959136 | 0.01208709 | 0.05324855 | Leuconostocaceae      | EasyDNA vs InnuPURE        |
| 243.261282 | -0.6779435 | 0.28737692 | -2.3590743 | 0.01832059 | 0.053326   | GZKB119               | EasyDNA vs PowerSoil.HMP   |
| 70.3986464 | 1.1324594  | 0.45348268 | 2.49724953 | 0.01251608 | 0.05368742 | Desulfovibrionaceae   | EasyDNA vs InnuPURE        |
| 7.94601326 | 1.90646899 | 0.81181724 | 2.34839678 | 0.01885442 | 0.05391704 | Micrococcaceae        | EasyDNA vs PowerSoil.HMP   |
| 129.664767 | -1.213787  | 0.48816066 | -2.4864499 | 0.01290247 | 0.05392572 | Sphingomonadaceae     | EasyDNA vs InnuPURE        |
| 12.0832988 | 2.17200442 | 0.8174185  | 2.65715106 | 0.00788041 | 0.05411217 | Microthrixaceae       | QIAstool+BB vs MagNAPure   |
| 28.0267224 | 1.75955604 | 0.67705141 | 2.59885144 | 0.00935362 | 0.05464486 | Succinivibrionaceae   | FastDNA vs MagNAPure       |
| 622.632062 | -0.7523083 | 0.32535862 | -2.3122433 | 0.02076428 | 0.05498688 | Flavobacteriaceae     | EasyDNA vs FastDNA         |
| 579.211848 | 0.70977486 | 0.28578343 | 2.48361094 | 0.01300578 | 0.05505781 | Cryomorpaceae         | PowerSoil.HMP vs QIAstool  |
| 11.2601759 | 2.2792279  | 0.96857952 | 2.35316549 | 0.01861435 | 0.05511307 | Peptococcaceae        | EasyDNA vs QIAstool+BB     |
| 22.9873604 | -2.4720555 | 0.97855392 | -2.5262333 | 0.01152929 | 0.05526107 | Staphylococcaceae     | QIAstool vs QIAstool+BB    |
| 310.195483 | 1.0118008  | 0.40293184 | 2.51109669 | 0.01203567 | 0.05576528 | Aeromonadaceae        | QIAstool vs QIAstool+BB    |
| 6.96503794 | 1.90349744 | 0.77276169 | 2.46323991 | 0.01376878 | 0.05640756 | Piscirickettsiaceae   | PowerSoil.HMP vs QIAstool  |
| 224.417038 | -0.9883822 | 0.43171742 | -2.2894192 | 0.02205501 | 0.05734302 | Caulobacteraceae      | EasyDNA vs FastDNA         |
| 2.31382502 | -2.7483795 | 1.10394795 | -2.4895916 | 0.012789   | 0.05734421 | Nocardiaceae          | QIAstool vs QIAstool+BB    |
| 182.91656  | -0.6936928 | 0.32325492 | -2.145962  | 0.03187601 | 0.05737304 | Planctomycetaceae     | EasyDNA vs MagNAPure       |
| 3.14112548 | -2.3181345 | 1.08289035 | -2.1406919 | 0.0322989  | 0.05737304 | OM60                  | EasyDNA vs MagNAPure       |
| 186.231671 | -0.9118034 | 0.37170792 | -2.4530104 | 0.01416662 | 0.05772899 | Rhizobiaceae          | EasyDNA vs InnuPURE        |
| 5.49329045 | -1.8319005 | 0.72941169 | -2.5114767 | 0.01202272 | 0.05787682 | Cyclobacteriaceae     | QIAstool vs MagNAPure      |
| 8.97993102 | -2.0613208 | 0.84378326 | -2.4429505 | 0.01456773 | 0.05791562 | Sediment-4            | EasyDNA vs InnuPURE        |

bioRxiv preprint doi: <https://doi.org/10.1101/064394>; this version posted July 18, 2016. The copyright holder for this preprint (which was not certified by peer review) is the author/funder, who has granted bioRxiv a license to display the preprint in perpetuity. It is made available under aCC-BY 4.0 International license.

|            |            |            |            |            |            |                       |                              |
|------------|------------|------------|------------|------------|------------|-----------------------|------------------------------|
| 12.2684488 | -1.5691396 | 0.64325243 | -2.4393838 | 0.01471233 | 0.05838958 | Synergistaceae        | PowerSoil.HMP vs QIAStool    |
| 104.663517 | 0.87151266 | 0.3830252  | 2.27534024 | 0.02288553 | 0.05843983 | Rikenellaceae         | EasyDNA vs FastDNA           |
| 127.559639 | -0.9708623 | 0.3795923  | -2.5576449 | 0.01053836 | 0.05848792 | Bradyrhizobiaceae     | FastDNA vs MagNAPure         |
| 11.4855136 | 1.65096216 | 0.68095654 | 2.42447508 | 0.01533054 | 0.05899933 | Gemmatimonadaceae     | PowerSoil.HMP vs QIAStool    |
| 4830.98886 | 0.64823777 | 0.30574015 | 2.12022453 | 0.03398711 | 0.0595878  | Moraxellaceae         | EasyDNA vs MagNAPure         |
| 4234.46977 | 0.80709372 | 0.3244551  | 2.48753594 | 0.01286315 | 0.06051525 | Ruminococcaceae       | QIAStool vs MagNAPure        |
| 6.96503794 | 1.86675561 | 0.74910667 | 2.49197568 | 0.01270347 | 0.06055322 | Piscirickettsiaceae   | FastDNA vs QIAStool          |
| 377.356263 | -0.5435773 | 0.23659302 | -2.2975206 | 0.02158909 | 0.06067279 | Sphingobacteriaceae   | EasyDNA vs PowerSoil.HMP     |
| 579.211848 | 0.87084781 | 0.35361388 | 2.46270821 | 0.01378921 | 0.06068046 | Cryomorphaceae        | InnuPURE vs QIAStool         |
| 50.9419349 | 1.38093288 | 0.56180151 | 2.45804409 | 0.0139696  | 0.06068046 | Desulfobulbaceae      | InnuPURE vs QIAStool         |
| 6.92597984 | -1.9786325 | 0.86497437 | -2.2875042 | 0.02216641 | 0.06123941 | [Chromatiaceae]       | EasyDNA vs PowerSoil.HMP     |
| 16.3205056 | -1.7055823 | 0.7409508  | -2.3018834 | 0.02134175 | 0.06197316 | Methylophilaceae      | EasyDNA vs QIAStool+BB       |
| 113.494552 | -0.8384629 | 0.34080263 | -2.4602596 | 0.01388365 | 0.06234019 | Alcaligenaceae        | FastDNA vs QIAStool          |
| 70.3986464 | -0.8486684 | 0.34519175 | -2.4585418 | 0.01395025 | 0.06234019 | Desulfovibrionaceae   | FastDNA vs QIAStool          |
| 355.031722 | -1.0110411 | 0.39463636 | -2.5619562 | 0.01040844 | 0.06245066 | [Weeksellaceae]       | PowerSoil.HMP vs MagNAPure   |
| 47.3908296 | -0.9325292 | 0.38114769 | -2.4466348 | 0.01441969 | 0.06248531 | Christensenellaceae   | FastDNA vs QIAStool          |
| 104.663517 | -1.1350299 | 0.46606219 | -2.4353614 | 0.01487692 | 0.06266339 | Rikenellaceae         | InnuPURE vs QIAStool         |
| 4.18916425 | 2.29762813 | 1.0113383  | 2.27186899 | 0.02309442 | 0.06273985 | Nocardiodaceae        | EasyDNA vs PowerSoil.HMP     |
| 28.0267224 | -1.3727681 | 0.56486719 | -2.4302494 | 0.01508844 | 0.06346019 | Succinivibrionaceae   | FastDNA vs QIAStool          |
| 264.350163 | 0.8838018  | 0.36532112 | 2.41924641 | 0.0155527  | 0.0635831  | Leptotrichiaceae      | InnuPURE vs QIAStool         |
| 113.494552 | -1.0371853 | 0.43307898 | -2.3949102 | 0.01662443 | 0.06456144 | Alcaligenaceae        | InnuPURE vs QIAStool         |
| 33.4444509 | 2.01392801 | 0.8425903  | 2.39016283 | 0.0168409  | 0.06456144 | Coriobacteriaceae     | InnuPURE vs QIAStool         |
| 3.5697885  | 2.44429648 | 1.0258444  | 2.38271659 | 0.01718542 | 0.06456144 | Beutenbergiaceae      | InnuPURE vs QIAStool         |
| 103.008126 | 1.10013504 | 0.42775185 | 2.57190011 | 0.01011421 | 0.06511021 | Enterococcaceae       | QIAStool+BB vs MagNAPure     |
| 649.223144 | 0.86594468 | 0.34641928 | 2.49970117 | 0.01242981 | 0.06570043 | Bifidobacteriaceae    | FastDNA vs MagNAPure         |
| 164.684355 | 1.13212163 | 0.49900063 | 2.26877795 | 0.02328183 | 0.06633126 | Clostridiaceae        | EasyDNA vs QIAStool+BB       |
| 28.7248963 | 1.22866154 | 0.51896204 | 2.36753646 | 0.01790696 | 0.06688775 | Acetobacteraceae      | PowerSoil.HMP vs QIAStool    |
| 186.231671 | -0.6985777 | 0.3119467  | -2.2394135 | 0.02512902 | 0.06714804 | Rhizobiaceae          | EasyDNA vs PowerSoil.HMP     |
| 3.21882027 | -2.2403395 | 1.01657284 | -2.203816  | 0.02753729 | 0.06722862 | Geobacteraceae        | EasyDNA vs FastDNA           |
| 243.261282 | -0.6192531 | 0.28126021 | -2.2017089 | 0.02768588 | 0.06722862 | GZKB119               | EasyDNA vs FastDNA           |
| 4.87640195 | 2.37711291 | 1.0817303  | 2.19750978 | 0.02798406 | 0.06722862 | Corynebacteriaceae    | EasyDNA vs FastDNA           |
| 377.356263 | -0.5086707 | 0.23180568 | -2.194384  | 0.02820781 | 0.06722862 | Sphingobacteriaceae   | EasyDNA vs FastDNA           |
| 4.27355164 | 2.11193339 | 0.88047945 | 2.39861747 | 0.0164571  | 0.067239   | Eubacteriaceae        | FastDNA vs QIAStool          |
| 264.350163 | -0.7890883 | 0.32627137 | -2.4185032 | 0.01558451 | 0.06769521 | Leptotrichiaceae      | QIAStool vs QIAStool+BB      |
| 17.3475351 | -1.9832942 | 0.83527701 | -2.3744149 | 0.01757679 | 0.06821467 | Isosphaeraceae        | EasyDNA vs InnuPURE          |
| 1181.58837 | 1.95342448 | 0.88069728 | 2.21804306 | 0.0265519  | 0.06980579 | Prevotellaceae        | EasyDNA vs PowerSoil.HMP     |
| 19.2945448 | -1.2707305 | 0.53094712 | -2.3933277 | 0.01669632 | 0.07032693 | BA008                 | QIAStool vs QIAStool+BB      |
| 3.24919787 | 2.02439771 | 0.98885767 | 2.04720839 | 0.04063763 | 0.07033436 | Leuconostocaceae      | EasyDNA vs MagNAPure         |
| 70.3986464 | 0.99071862 | 0.39671413 | 2.49731114 | 0.01251391 | 0.07066679 | Desulfovibrionaceae   | PowerSoil.HMP vs MagNAPure   |
| 22.1599751 | 1.53415787 | 0.75524233 | 2.03134519 | 0.04221999 | 0.07214808 | Sanguibacteraceae     | EasyDNA vs MagNAPure         |
| 79.5100271 | 0.88963046 | 0.37786776 | 2.35434341 | 0.01855546 | 0.0724779  | Bdellovibrionaceae    | FastDNA vs QIAStool          |
| 5.49329045 | 1.69380301 | 0.72064323 | 2.3504044  | 0.01875302 | 0.0724779  | Cyclobacteriaceae     | FastDNA vs QIAStool          |
| 4.81963649 | -2.3118932 | 0.98963119 | -2.336116  | 0.0194852  | 0.07386249 | auto67_4W             | EasyDNA vs InnuPURE          |
| 2.55199853 | -2.2827904 | 1.04339628 | -2.187846  | 0.02868082 | 0.07420014 | Holophagaceae         | EasyDNA vs PowerSoil.HMP     |
| 182.91656  | 0.73524789 | 0.33701129 | 2.18167136 | 0.0291338  | 0.07420014 | Planctomycetaceae     | EasyDNA vs PowerSoil.HMP     |
| 22.9873604 | 2.14709978 | 0.91924374 | 2.33572414 | 0.01950562 | 0.07451148 | Staphylococcaceae     | EasyDNA vs QIAStool          |
| 642.395629 | -0.8615187 | 0.3894487  | -2.2121495 | 0.02695634 | 0.07537791 | Rhodocyclaceae        | EasyDNA vs QIAStool+BB       |
| 1.01494259 | -2.6305311 | 1.10333506 | -2.3841635 | 0.017118   | 0.07685828 | Gemmataceae           | QIAStool vs MagNAPure        |
| 310.195483 | 0.8934204  | 0.37551544 | 2.37918422 | 0.017351   | 0.07685828 | Aeromonadaceae        | QIAStool vs MagNAPure        |
| 254.528648 | -0.9770092 | 0.41101457 | -2.3770671 | 0.01745091 | 0.07685828 | Xanthomonadaceae      | QIAStool vs MagNAPure        |
| 4.06716246 | -1.8067423 | 0.77930346 | -2.3184066 | 0.02042724 | 0.07687091 | Elusimicrobiaceae     | FastDNA vs QIAStool          |
| 19.2945448 | -1.1273417 | 0.47588079 | -2.3689582 | 0.01783827 | 0.07692754 | BA008                 | QIAStool vs MagNAPure        |
| 4.81963649 | -2.1101927 | 0.9610752  | -2.1956582 | 0.02811642 | 0.07719234 | auto67_4W             | EasyDNA vs QIAStool+BB       |
| 2.3093169  | -2.3470892 | 1.01440126 | -2.313768  | 0.02068045 | 0.07745031 | Myxococcaceae         | EasyDNA vs QIAStool          |
| 22.5747955 | 1.12730926 | 0.52924208 | 2.13004465 | 0.03316793 | 0.07775432 | Peptostreptococcaceae | EasyDNA vs FastDNA           |
| 736.495903 | 2.47243917 | 0.73392038 | 3.36881115 | 0.00075493 | 0.07813539 | Enterobacteriaceae    | PowerSoil.HMP vs QIAStool+BB |
| 22.9873604 | 1.9190924  | 0.96704297 | 1.98449547 | 0.04720063 | 0.07965107 | Staphylococcaceae     | EasyDNA vs MagNAPure         |
| 164.684355 | 1.22958079 | 0.50750114 | 2.42281388 | 0.01540081 | 0.07974548 | Clostridiaceae        | PowerSoil.HMP vs MagNAPure   |
| 4234.46977 | 0.850399   | 0.35438523 | 2.39964574 | 0.01641095 | 0.07974548 | Ruminococcaceae       | PowerSoil.HMP vs MagNAPure   |
| 141.200238 | 0.87189043 | 0.36402356 | 2.39514836 | 0.01661364 | 0.07974548 | Chitinophagaceae      | PowerSoil.HMP vs MagNAPure   |
| 649.223144 | -0.8825037 | 0.37134215 | -2.3765246 | 0.0174766  | 0.07989301 | Bifidobacteriaceae    | PowerSoil.HMP vs MagNAPure   |
| 377.356263 | -0.4611657 | 0.23319393 | -1.9776057 | 0.0479732  | 0.07995534 | Sphingobacteriaceae   | EasyDNA vs MagNAPure         |
| 13.1651756 | -1.4992527 | 0.69891407 | -2.1451174 | 0.03194346 | 0.08010438 | Helicobacteraceae     | EasyDNA vs PowerSoil.HMP     |
| 182.91656  | 1.18518163 | 0.41749716 | 2.83877771 | 0.00452867 | 0.08094996 | Planctomycetaceae     | InnuPURE vs PowerSoil.HMP    |
| 1.55959833 | 3.06644109 | 1.09689413 | 2.79556704 | 0.00518088 | 0.08231836 | Dermatophilaceae      | InnuPURE vs PowerSoil.HMP    |



bioRxiv preprint doi: <https://doi.org/10.1101/064394>; this version posted July 18, 2016. The copyright holder for this preprint (which was not certified by peer review) is the author/funder, who has granted bioRxiv a license to display the preprint in perpetuity. It is made available under aCC-BY 4.0 International license.

|            |            |            |            |            |            |                     |                              |
|------------|------------|------------|------------|------------|------------|---------------------|------------------------------|
| 131.739477 | -0.797345  | 0.33199055 | -2.4017101 | 0.01631864 | 0.08233494 | Hyphomicrobiaceae   | FastDNA vs MagNAPure         |
| 131.739477 | -0.9313915 | 0.40909714 | -2.2767002 | 0.02280414 | 0.08447896 | Hyphomicrobiaceae   | EasyDNA vs InnuPURE          |
| 13.1651756 | -1.4567213 | 0.64093998 | -2.272789  | 0.0230389  | 0.08462364 | Helicobacteraceae   | EasyDNA vs QIAStool          |
| 579.211848 | -0.6602391 | 0.2839074  | -2.3255439 | 0.0200429  | 0.08467101 | Cryomorpaceae       | QIAStool vs MagNAPure        |
| 92.6279814 | -0.9949071 | 0.43808997 | -2.2710109 | 0.02314632 | 0.08486984 | Oxalobacteraceae    | FastDNA vs QIAStool          |
| 29.0135086 | -1.2323803 | 0.54478605 | -2.2621363 | 0.02368898 | 0.08536974 | Alteromonadaceae    | EasyDNA vs QIAStool          |
| 243.261282 | -0.6671317 | 0.31081555 | -2.1463909 | 0.0318418  | 0.08585914 | GZKB119             | EasyDNA vs QIAStool+BB       |
| 38.1375375 | 1.08211604 | 0.55767402 | 1.94040963 | 0.05232993 | 0.08615293 | Procabacteriaceae   | EasyDNA vs MagNAPure         |
| 505.493872 | -1.0047589 | 0.43784747 | -2.2947692 | 0.02174636 | 0.08647001 | Erysipelotrichaceae | QIAStool vs QIAStool+BB      |
| 4.18916425 | -2.3294501 | 1.0153187  | -2.2943043 | 0.02177303 | 0.08647001 | Nocardioidaceae     | QIAStool vs QIAStool+BB      |
| 11.4855136 | -1.3573909 | 0.70420385 | -1.927554  | 0.05391063 | 0.08768596 | Gemmatimonadaceae   | EasyDNA vs MagNAPure         |
| 5.49329045 | -1.5087589 | 0.78541121 | -1.9209795 | 0.05473429 | 0.08796582 | Cyclobacteriaceae   | EasyDNA vs MagNAPure         |
| 3.07801265 | 2.12104453 | 0.94429648 | 2.24616376 | 0.02469352 | 0.08827934 | Caldilineaceae      | FastDNA vs QIAStool          |
| 719.094782 | 0.74746237 | 0.33440796 | 2.23518117 | 0.02540546 | 0.08860928 | Streptococcaceae    | FastDNA vs QIAStool          |
| 254.528648 | 0.93025684 | 0.41369801 | 2.24863746 | 0.02453557 | 0.08902907 | Xanthomonadaceae    | PowerSoil.HMP vs QIAStool    |
| 20.0435737 | -1.0503917 | 0.50791832 | -2.0680327 | 0.03863694 | 0.08911424 | Saprosiraceae       | EasyDNA vs FastDNA           |
| 164.684355 | 1.30379789 | 0.53572935 | 2.43368761 | 0.01494589 | 0.0905545  | Clostridiaceae      | QIAStool+BB vs MagNAPure     |
| 141.200238 | 0.93724671 | 0.38880135 | 2.41060559 | 0.01592606 | 0.09113246 | Chitinophagaceae    | QIAStool+BB vs MagNAPure     |
| 377.356263 | 0.62154676 | 0.27788464 | 2.23670791 | 0.02530544 | 0.09256462 | Sphingobacteriaceae | InnuPURE vs QIAStool         |
| 33.4444509 | -1.6904111 | 0.74230936 | -2.2772326 | 0.02277234 | 0.09427748 | Coriobacteriaceae   | QIAStool vs MagNAPure        |
| 105.619852 | -1.021215  | 0.44996553 | -2.2695406 | 0.02323547 | 0.09430867 | Nitrosomonadaceae   | QIAStool vs MagNAPure        |
| 22.1599751 | 1.78724592 | 0.80863491 | 2.21020129 | 0.0270912  | 0.09439858 | Sanguibacteraceae   | PowerSoil.HMP vs QIAStool    |
| 4.81963649 | -1.8045008 | 0.81885869 | -2.2036779 | 0.027547   | 0.09439858 | auto67_4W           | PowerSoil.HMP vs QIAStool    |
| 50.9419349 | 1.03667507 | 0.47253405 | 2.1938632  | 0.02824525 | 0.09439858 | Desulfobulbaceae    | PowerSoil.HMP vs QIAStool    |
| 8.22875632 | -1.847976  | 0.8213212  | -2.2500041 | 0.02444869 | 0.0943991  | Solibacteraceae     | QIAStool vs QIAStool+BB      |
| 29.0135086 | -1.1098265 | 0.58897604 | -1.8843321 | 0.05952006 | 0.09453186 | Alteromonadaceae    | EasyDNA vs MagNAPure         |
| 91.6048239 | -0.7732133 | 0.36814481 | -2.1002967 | 0.03570275 | 0.09458097 | Halomonadaceae      | EasyDNA vs QIAStool+BB       |
| 2.3093169  | -2.2044833 | 1.06566745 | -2.0686409 | 0.0385798  | 0.09503659 | Myxococcaceae       | EasyDNA vs PowerSoil.HMP     |
| 642.395629 | -0.7773137 | 0.37669477 | -2.0635108 | 0.03906412 | 0.09503659 | Rhodocyclaceae      | EasyDNA vs PowerSoil.HMP     |
| 118.159531 | -1.6497585 | 0.49812382 | -3.3119446 | 0.0009265  | 0.09589264 | Rhodobacteraceae    | FastDNA vs InnuPURE          |
| 49.8040986 | -1.915968  | 0.59985447 | -3.1940546 | 0.0014029  | 0.0967998  | Actinomycetaceae    | PowerSoil.HMP vs QIAStool+BB |
| 31.145957  | -2.1008028 | 0.92480483 | -2.2716174 | 0.02310963 | 0.0973037  | Aerococcaceae       | FastDNA vs PowerSoil.HMP     |
| 15.0781299 | 1.10535598 | 0.54633858 | 2.02320688 | 0.04305182 | 0.0977208  | [Odoribacteraceae]  | EasyDNA vs FastDNA           |
| 44.0121162 | -1.4733537 | 0.62305494 | -2.3647251 | 0.01804346 | 0.09781453 | Microbacteriaceae   | QIAStool+BB vs MagNAPure     |
| 1756.14884 | -1.2328734 | 0.46055978 | -2.6769019 | 0.00743064 | 0.09793244 | Neisseriaceae       | InnuPURE vs PowerSoil.HMP    |
| 243.261282 | -0.9574556 | 0.36120868 | -2.6506993 | 0.00803253 | 0.09793244 | GZKB119             | InnuPURE vs PowerSoil.HMP    |
| 44.0121162 | 1.80866043 | 0.68432745 | 2.64297515 | 0.00821811 | 0.09793244 | Microbacteriaceae   | InnuPURE vs PowerSoil.HMP    |
| 2.61442095 | 2.04322522 | 0.93447232 | 2.18650159 | 0.02877893 | 0.0979854  | Ellin515            | FastDNA vs QIAStool          |
| 10.9576795 | -1.3578423 | 0.72891946 | -1.8628152 | 0.06248827 | 0.09809204 | Acholeplasmataceae  | EasyDNA vs MagNAPure         |
| 593.953594 | -0.6205976 | 0.28170633 | -2.2029949 | 0.0275951  | 0.09841013 | Cytophagaceae       | EasyDNA vs InnuPURE          |
| 28.7345598 | -1.3134923 | 0.59690916 | -2.2004895 | 0.02777218 | 0.09841013 | Parachlamydiaceae   | EasyDNA vs InnuPURE          |
| 22.2584553 | 1.27850913 | 0.68878738 | 1.85617385 | 0.06342878 | 0.09842397 | S24-7               | EasyDNA vs MagNAPure         |
| 44.0121162 | 1.16764997 | 0.53725954 | 2.17334431 | 0.02975441 | 0.09856449 | Microbacteriaceae   | FastDNA vs QIAStool          |
| 3.5697885  | 2.04025878 | 0.94204076 | 2.1657861  | 0.03032754 | 0.09856449 | Beutenbergiaceae    | FastDNA vs QIAStool          |
| 38.1375375 | 1.28724283 | 0.57931343 | 2.22201449 | 0.02628233 | 0.09873631 | Procabacteriaceae   | QIAStool vs QIAStool+BB      |
| 283.625111 | 1.51356979 | 0.66399228 | 2.27949907 | 0.02263742 | 0.09878145 | Lactobacillaceae    | PowerSoil.HMP vs MagNAPure   |
| 70.3986464 | 0.85713572 | 0.41436171 | 2.06856886 | 0.03858656 | 0.09879332 | Desulfovibrionaceae | EasyDNA vs QIAStool+BB       |
| 4.87640195 | 2.25110021 | 1.09119838 | 2.06296146 | 0.03911629 | 0.09879332 | Corynebacteriaceae  | EasyDNA vs QIAStool+BB       |
| 1.41904526 | 2.24885942 | 1.09088645 | 2.06149725 | 0.03925563 | 0.09879332 | Dehalobacteriaceae  | EasyDNA vs QIAStool+BB       |
| 4.46443875 | 1.94043662 | 0.89629733 | 2.16494746 | 0.03039171 | 0.09896787 | Xanthobacteraceae   | PowerSoil.HMP vs QIAStool    |
| 28.7248963 | -1.2327152 | 0.56097099 | -2.1974669 | 0.02798712 | 0.09899147 | Acetobacteraceae    | EasyDNA vs QIAStool          |
| 38.1375375 | -1.3782365 | 0.62635739 | -2.2003995 | 0.02777856 | 0.09900564 | Procabacteriaceae   | InnuPURE vs QIAStool         |
| 7.94601326 | 2.49871504 | 0.90484448 | 2.76148565 | 0.0057539  | 0.09925485 | Micrococcaceae      | InnuPURE vs MagNAPure        |
| 13.1651756 | -1.6658237 | 0.76085582 | -2.1894078 | 0.02856721 | 0.09927107 | Helicobacteraceae   | InnuPURE vs QIAStool         |
| 224.417038 | -1.0205732 | 0.44198438 | -2.3090707 | 0.02093966 | 0.09943231 | Caulobacteraceae    | FastDNA vs MagNAPure         |
| 1756.14884 | -0.8783179 | 0.38202572 | -2.2991067 | 0.02149888 | 0.09943231 | Neisseriaceae       | FastDNA vs MagNAPure         |
| 49.8040986 | 1.32588889 | 0.5667839  | 2.33931996 | 0.01931888 | 0.09949224 | Actinomycetaceae    | QIAStool+BB vs MagNAPure     |
| 1756.14884 | -0.7194269 | 0.35366435 | -2.034208  | 0.04193062 | 0.09951465 | Neisseriaceae       | EasyDNA vs PowerSoil.HMP     |
| 10.9576795 | -1.5130076 | 0.74448962 | -2.0322749 | 0.04212583 | 0.09951465 | Acholeplasmataceae  | EasyDNA vs PowerSoil.HMP     |
| 1.41904526 | 2.33278776 | 1.06856001 | 2.18311347 | 0.02902745 | 0.09977434 | Dehalobacteriaceae  | EasyDNA vs InnuPURE          |
| 4.87640195 | 2.35164946 | 1.07956479 | 2.17833102 | 0.0293814  | 0.09977434 | Corynebacteriaceae  | EasyDNA vs InnuPURE          |
| 15.0781299 | 1.47004964 | 0.68024796 | 2.16104968 | 0.0306915  | 0.09985342 | [Odoribacteraceae]  | EasyDNA vs InnuPURE          |
| 60.913589  | -0.9475891 | 0.43964149 | -2.1553677 | 0.03113307 | 0.09985342 | SB-1                | EasyDNA vs InnuPURE          |
| 1.54406709 | -2.3845863 | 1.10706543 | -2.1539706 | 0.03124248 | 0.09985342 | Mycobacteriaceae    | EasyDNA vs InnuPURE          |
